# Supplementary material for: Formation of a C–C double bond from two aliphatic carbons. Multiple C–H activations in an iridium pincer complex
Source: PubMed Central journal article supplement (PMC5496475; doi:10.1039/c4sc03839h), 2015-01-26
Supplement: SC-006-C4SC03839H-s001.pdf [file SC-006-C4SC03839H-s001.pdf]

Electronic Supporting Information for

**Formation of a C–C double bond from two aliphatic carbons. Multiple  
C–H activations in an iridium pincer complex**

Alexey V. Polukeev, Rocío Marcos, Mårten S. G. Ahlquist  
and Ola F. Wendt\*

*Centre for Analysis and Synthesis, Department of Chemistry, Lund University, P.O.  
Box 124, 221 00 Lund, Sweden, and Division of Theoretical Chemistry & Biology,  
School of Biotechnology, KTH Royal Institute of Technology, Stockholm 106 91,  
Sweden.*

\*correspondence to: [ola.wendt@chem.lu.se](mailto:ola.wendt@chem.lu.se)

## Table of contents

|                                                      |     |
|------------------------------------------------------|-----|
| 1. Experimental part                                 | S2  |
| 2. Computational part                                | S12 |
| Summary of additional computational results          | S12 |
| Calculated energies for all the species              | S29 |
| Cartesian coordinates for all the species calculated | S32 |
| 3. NMR Spectra of 3, 5, 6, 7, and 21                 | S66 |
| 4. References                                        | S72 |

## 1. Experimental part

**General considerations.** All manipulations were conducted under an inert gas atmosphere using standard Schlenk, high vacuum line and glovebox techniques unless otherwise stated. All solvents were distilled under vacuum from Na/benzophenone. Hydrocarbon deuterated solvents were distilled under vacuum from Na/benzophenone, CD<sub>2</sub>Cl<sub>2</sub> was distilled under vacuum from calcium hydride. NMR spectra were recorded on a Varian Unity INOVA 500 MHz instrument. <sup>1</sup>H and <sup>13</sup>C NMR chemical shifts are reported in parts per million and referenced to the signals of deuterated solvents. <sup>31</sup>P{<sup>1</sup>H} NMR chemical shifts are reported relative to external 85% solution of phosphoric acid. Systems of two coupled nuclei are treated as AB for  $\Delta\nu/J < 4$  and as AX for  $\Delta\nu/J \geq 4$ . In some <sup>31</sup>P{<sup>1</sup>H} and <sup>13</sup>C{<sup>1</sup>H} NMR spectra decoupling of high-field hydride ligands was incomplete or totally absent; in the latter case coupling constants are indicated in the text. Assignments of signals were confirmed using COSY, TOCSY, NOESY, <sup>1</sup>H-<sup>13</sup>C HSQC, <sup>1</sup>H-<sup>13</sup>C and <sup>1</sup>H-<sup>31</sup>P HMBC spectra. When multiplets cannot be resolved in complex <sup>1</sup>H spectra due to overlap with other resonances, the center of the signal according to the 2D spectrum is reported. IR spectra were recorded on a Bruker Alpha spectrometer. Elemental analyses were performed by H. Kolbe Microanalytisches Laboratorium, Mülheim an der Ruhr, Germany. Despite several attempts, satisfactory elemental analysis for **3** was not obtained, presumably due to decomposition; nevertheless, the compound is pure as indicated by NMR spectra.

**Synthesis of hydrido-phenyl complex 2.** A Straus flask was charged with (PCyP)IrHCl (**1**) (0.025 g, 0.040 mmol) and <sup>t</sup>BuONa (0.0057 g, 0.060 mmol) inside a nitrogen atmosphere glovebox, and 5 ml of C<sub>6</sub>H<sub>6</sub> were vacuum-transferred to this mixture followed by refilling with Ar. After heating the flask on an oil bath for 15 h at 65 °C, complex **2** is formed almost quantitatively. This compound is extremely unstable and readily reacts with traces of oxygen, nitrogen and moisture, as well as traces of impurities in commercial solvents, in particular with those in mesitylene-*d*<sub>12</sub>.

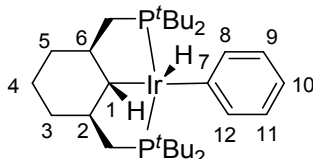

<sup>1</sup>H NMR (500 MHz, methylcyclohexane-*d*<sub>14</sub>):  $\delta$  7.2 and 6.9 (very br, overlapping, Ar-H), 2.37-2.32 (m, 2H, -CH<sub>A</sub>H<sub>B</sub>-P), 2.16-2.12 (m, 2H, 3-H<sub>A</sub> + 5-H<sub>A</sub>), 2.92-1.87 (m, 1H, 4-H<sub>A</sub>),

1.68 (t,  $^3J_{\text{HH}} = 10.3$  Hz, 1-H), 1.63-1.56 (overlapping m, 2-H + 6-H and  $-\text{CH}_A\text{H}_B\text{-P}$ ), 1.28 (overlapping, 4- $\text{H}_B$ ), 1.17 (vt,  $|^3J_{\text{PH}} + ^5J_{\text{PH}}| = 12.4$  Hz, 18H, 2  $\text{tBu}$ ), 1.05 (vt,  $|^3J_{\text{PH}} + ^5J_{\text{PH}}| = 12.3$  Hz, 18H, 2  $\text{tBu}$ ), 0.99-0.91 (m, 2H, 3- $\text{H}_B + 5\text{-H}_B$ ), -47.8 (very br, Ir-H).

$^1\text{H}$  NMR (500 MHz, methylcyclohexane- $d_{14}$ ,  $-40$  °C, selected signals):  $\delta$  7.46 (d,  $^3J_{\text{HH}} = 7.3$  Hz, 1H, 12-H), 7.43 (d,  $^3J_{\text{HH}} = 7.3$  Hz, 1H, 8-H), 6.89 (apparent dt,  $^3J_{\text{HH}} = 7.3$  Hz,  $^4J_{\text{HH}} = 1.6$  Hz, 1H, 11-H), 6.67 (apparent dt,  $^3J_{\text{HH}} = 7.3$  Hz,  $^4J_{\text{HH}} = 1.6$  Hz, 1H, 9-H), 6.52 (apparent t,  $^3J_{\text{HH}} = 7.3$  Hz, 1H, 10-H), -48.22 (br t,  $^2J_{\text{PH}} = 12.3$  Hz, 1H, Ir-H).  $^{31}\text{P}\{^1\text{H}\}$  NMR (202 MHz, methylcyclohexane- $d_{14}$ ,  $-40$  °C):  $\delta$  63.1 (s).

**Synthesis of isomeric hydrido-phenyl carbonyl complexes 3.** To a degassed solution of complex **2** in  $\text{C}_6\text{H}_6$ , prepared as described previously from complex **1** (0.025 g, 0.040 mmol) and  $\text{tBuONa}$  (0.0057 g, 0.060 mmol), 1 atm of CO was added, and the solution was stirred for 30 min, accompanied with a color change from red to pale yellow. After this, 5 ml of degassed water was added, the mixture was stirred for 10 min, the organic phase was decanted and passed through a thin layer of Celite; the Celite was washed with small portion of benzene. Evaporation of the volatiles gave **3** in ca. 95% purity according to NMR, further purification could be achieved by flash chromatography on basic alumina using  $\text{C}_6\text{H}_6$  as eluent. **3** is obtained as white powder; yield 0.024 g, 86%.

Characterization of complex **3-syn**:

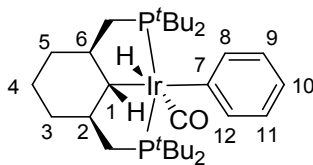

$^1\text{H}$  NMR (500 MHz,  $\text{C}_6\text{D}_6$ ):  $\delta$  8.30 (br, 2H, 8-H and 12-H), 7.10 (br m, 2H, 9-H + 11-H), 7.03 (br t,  $^3J_{\text{HH}} = 7.1$  Hz, 1H, 10-H), 2.20 (dd(vt),  $^2J_{\text{HH}} = 13.6$  Hz,  $^3J_{\text{HH}} = 4.1$  Hz,  $|^2J_{\text{PH}} + ^4J_{\text{PH}}| = 7.0$  Hz, 2H,  $\text{CH}_A\text{H}_B\text{-P}$ ), 2.08-1.99 (m, 3H, 3- $\text{H}_A + 5\text{-H}_A$  and 4- $\text{H}_A$ ), 1.70 (td, 1H,  $^3J_{\text{HH}} = 10.2$  Hz,  $^3J_{\text{H(IHH)}} = 1.6$  Hz, 1-H), 1.66-1.58 (m, 2H, 2-H + 6-H), 1.50 (overlapping, apparent qt,  $J_1 = 13.3$  Hz,  $J_2 = 4.1$  Hz, 1H, 4- $\text{H}_B$ ), 1.44 (overlapping, apparent t(vt),  $^2J_{\text{HH}} = ^3J_{\text{HH}} = 13.6$  Hz,  $|^2J_{\text{PH}} + ^4J_{\text{PH}}| = 7.0$  Hz, 2H,  $\text{CH}_A\text{H}_B\text{-P}$ ), 1.25 (vt,  $|^3J_{\text{PH}} + ^5J_{\text{PH}}| = 12.8$  Hz, 18H, 2  $\text{tBu}$ ), 1.12 (vt,  $|^3J_{\text{PH}} + ^5J_{\text{PH}}| = 13.0$  Hz, 18H, 2  $\text{tBu}$ ), 1.03-0.95 (m, 2H, 3- $\text{H}_B + 5\text{-H}_B$ ), -9.27 (td,  $^2J_{\text{PH}} = 17.0$  Hz,  $^3J_{\text{HH}} = 1.6$  Hz, 1H, Ir-H).  $^{13}\text{C}\{^1\text{H}\}$  NMR (126 MHz,  $\text{C}_6\text{D}_6$ ):  $\delta$  187.88 (m, CO), 149.1 (very br, 8-C and 12-C), 135.43 (t,  $^2J_{\text{PC}} = 7.9$  Hz, 7-C), 127.3 (very br, 9-C and 11-C), 121.01 (t,  $^5J_{\text{PC}} = 0.9$  Hz, 10-C), 51.19 (vt,  $|^2J_{\text{PC}} + ^3J_{\text{PC}}| = 11.0$  Hz, 2-C and 6-C), 39.96 (vt,  $|^1J_{\text{PC}} + ^3J_{\text{PC}}| = 26.0$  Hz,  $\text{CH}_2\text{-P}$ ), 37.24 (vt,  $|^1J_{\text{PC}} + ^3J_{\text{PC}}| = 20.0$  Hz,  $\text{C}(\text{CH}_3)_3$ ), 36.45 (vt,  $|^1J_{\text{PC}} + ^3J_{\text{PC}}| = 25.4$  Hz,  $\text{C}(\text{CH}_3)_3$ ), 35.16 (s, 1-C), 34.42 (vt,  $|^3J_{\text{PC}} + ^4J_{\text{PC}}| = 17.8$  Hz, 3-C and 5-C), 31.38 (vt,  $|^2J_{\text{PC}} + ^4J_{\text{PC}}| = 3.6$  Hz,  $\text{C}(\text{CH}_3)_3$ ), 30.79 (vt,  $|^2J_{\text{PC}} + ^4J_{\text{PC}}| = 4.4$  Hz,  $\text{C}(\text{CH}_3)_3$ ), 28.08 (t,  $^4J_{\text{PC}} = 1.6$  Hz, 4-C).  $^{31}\text{P}$  NMR (202 MHz,  $\text{C}_6\text{D}_6$ ):  $\delta$  48.05 (br d). IR (hexane),  $\text{cm}^{-1}$ : 2124 (w, Ir-H), 1951  $\text{cm}^{-1}$  (s,  $\nu_{\text{CO}}$ ).

Characterization of complex **3-anti**:

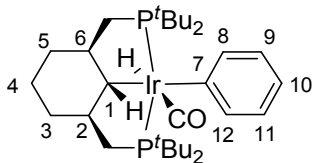

$^1\text{H}$  NMR (500 MHz,  $\text{C}_6\text{D}_6$ ):  $\delta$  8.39 (d,  $^3J_{\text{HH}} = 7.1$  Hz, 1H, 12-H), 8.21 (d,  $^3J_{\text{HH}} = 6.6$  Hz, 1H, 8-H), 2.03 (overlapping,  $\text{CH}_2\text{-P}$ ), 1.74 (overlapping, 2-H + 6-H), 1.28 (overlapping,

1-H), 1.20 (vt,  $|^3J_{PH} + ^5J_{PH}| = 13.0$  Hz, 18H, 2  $t$ Bu), 1.10 (overlapping, vt,  $|^3J_{PH} + ^5J_{PH}| = 12.6$  Hz, 2  $t$ Bu), 0.89-0.81 (m, 2H, 3- $H_B$  + 5- $H_B$ ), -8.76 (td,  $^2J_{PH} = 19.0$  Hz,  $^3J_{HH} = 2.3$  Hz, 1H, Ir-H).  $^{13}C\{^1H\}$  NMR (126 MHz,  $C_6D_6$ ):  $\delta$  188.6 (m, CO), 150.12 (s, 12-C), 147.90 (s, 8-C), 136.34 (t,  $^2J_{PC} = 7.4$  Hz, 7-C), 126.29 (9-C or 11-C), 120.88 (t,  $^5J_{PC} = 0.9$  Hz, 10-C), 53.02 (vt,  $|^2J_{PC} + ^3J_{PC}| = 13.0$  Hz, 2-C and 6-C), 37.88 (vt,  $|^1J_{PC} + ^3J_{PC}| = 19.2$  Hz,  $C(CH_3)_3$ ), 37.57 (vt,  $|^1J_{PC} + ^3J_{PC}| = 25.6$  Hz,  $CH_2$ -P), 36.33 (overlapping, vt,  $|^1J_{PC} + ^3J_{PC}| = 26.6$  Hz,  $C(CH_3)_3$ ), ca. 34.49 (overlapping, 3-C and 5-C), 30.26 (vt,  $|^2J_{PC} + ^4J_{PC}| = 4.8$  Hz,  $C(CH_3)_3$ ), 30.79 (br,  $C(CH_3)_3$ ), 27.49 (t,  $^4J_{PC} = 1.8$  Hz, 4-C).  $^{31}P\{^1H\}$  NMR (202 MHz,  $C_6D_6$ ):  $\delta$  49.11 (br d). IR (hexane),  $cm^{-1}$ : 2199 (w, Ir-H), 1966  $cm^{-1}$  (s,  $\nu_{CO}$ ).

**Synthesis of isomeric hydrido-phenyl carbonyl complexes 3 (*syn* and *anti*), labeled with  $^{13}CO$ .** Starting from complex **1** (0.015 g, 0.024 mmol),  $t$ BuONa (0.0034 g, 0.035 mmol) and  $^{13}CO$ , complex **3- $^{13}CO$**  (0.014 g, 84%) was prepared as described previously. **3- $^{13}CO$ -*syn***, selected signals:  $^1H$  NMR (500 MHz,  $C_6D_6$ ):  $\delta$  -9.26 (dtd,  $^2J_{CH} = 42.9$  Hz,  $^2J_{PH} = 17.0$  Hz,  $^3J_{HH} = 1.6$  Hz, 1H, Ir-H).  $^{31}P\{^1H\}$  NMR (202 MHz,  $C_6D_6$ ):  $\delta$  48.06 (m).  $^{13}C$  NMR (126 MHz,  $C_6D_6$ )  $\delta$  187.89 (dtd,  $^2J_{CH} = 42.9$  Hz,  $^2J_{PC} = 5.7$  Hz,  $^3J_{CH} = 3.3$  Hz, CO). IR (hexane),  $cm^{-1}$ : 2117 (w, Ir-H), 1909  $cm^{-1}$  (s,  $\nu_{CO}$ ). Calculated from  $\nu_{12CO}$ : 1908  $cm^{-1}$ . **3- $^{13}CO$ -*anti***, selected signals:  $^1H$  NMR (500 MHz,  $C_6D_6$ ):  $\delta$  -8.76 (dtd,  $^2J_{CH} = 42.5$  Hz,  $^2J_{PH} = 19.0$  Hz,  $^3J_{HH} = 2.3$  Hz, 1H, Ir-H).  $^{31}P\{^1H\}$  NMR (202 MHz,  $C_6D_6$ ):  $\delta$  49.11 (m).  $^{13}C$  NMR (126 MHz,  $C_6D_6$ )  $\delta$  188.64 (dtd,  $^2J_{CH} = 42.5$  Hz,  $^2J_{PC} = 6.2$  Hz,  $^3J_{CH} = 1.1$  Hz, CO). IR (hexane),  $cm^{-1}$ : 2196 (w, Ir-H), 1925  $cm^{-1}$  (s,  $\nu_{CO}$ ). Calculated from  $\nu_{12CO}$ : 1922  $cm^{-1}$ .

**Synthesis of isomeric hydrido-phenyl carbonyl complexes 3-(D, $C_6D_5$ ) (*syn* and *anti*), labeled with deuterium.** Starting from complex **1** (0.015 g, 0.024 mmol),  $t$ BuONa (0.0034 g, 0.035 mmol) and 1 ml of  $C_6D_6$ , complex **3-(D, $C_6D_5$ )** (0.014 g, 83%) was prepared as described previously. **3-(D, $C_6D_5$ )-*syn***, selected signals:  $^{31}P\{^1H\}$  NMR (162 MHz,  $C_6D_6$ ):  $\delta$  48.0 (br). IR (hexane),  $cm^{-1}$ : 1970  $cm^{-1}$  (s,  $\nu_{CO}$ ). **3-(D, $C_6D_5$ )-*anti***, selected signals:  $^{31}P\{^1H\}$  NMR (162 MHz,  $C_6D_6$ ):  $\delta$  49.0 (br). IR (hexane),  $cm^{-1}$ : 1983  $cm^{-1}$  (s,  $\nu_{CO}$ ). An additional medium-intense band at 1991  $cm^{-1}$  was also observed, presumably from decomposition product.

**Synthesis of C-C coupling product 4.** A Straus flask was charged with (PCyP)IrHCl (**1**) (0.050 g, 0.080 mmol) and  $t$ BuONa (0.012 g, 0.125 mmol) inside a nitrogen atmosphere glovebox, and 15 ml of  $C_6H_6$  was vacuum-transferred to this mixture. The flask was refilled with Ar followed by addition of *tert*-butylethylene (0.05 ml, 0.388 mmol). Then the reaction mixture was heated on an oil bath for 18 h at 120  $^{\circ}C$ , allowed to reach room temperature, and 10 ml of degassed water was added. The mixture was stirred for 10 min, the organic phase was decanted and passed through a thin layer of Celite; the Celite was washed with a small portion of benzene. The volatiles were evaporated and the residue was dried in vacuum to give **4** as red-orange powder in quantitative yield.

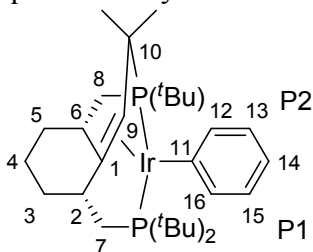

Anal. Calc. for C<sub>30</sub>H<sub>51</sub>IrP<sub>2</sub>: C, 54.11; H, 7.72. Found C, 54.46, H, 7.66.

<sup>1</sup>H NMR (500 MHz, C<sub>6</sub>D<sub>6</sub>): δ 7.78 (slightly br d, <sup>3</sup>J<sub>HH</sub> = 7.5 Hz, 2H, 12-H + 16-H), 7.36 (apparent t, <sup>3</sup>J<sub>H(12+16)H(13+15)}</sub> = <sup>3</sup>J<sub>H(13+15)H14}</sub> = 7.5 Hz, 2H, 13-H + 15-H), 6.90 (slightly br t, <sup>3</sup>J<sub>HH</sub> = 7.5 Hz, 1H, 14-H) 2.00 (apparent tdd, <sup>2</sup>J<sub>HH</sub> = <sup>2</sup>J<sub>P2H</sub> = 12.7 Hz, <sup>3</sup>J<sub>HH</sub> = 8.2 Hz, <sup>2</sup>J<sub>P1H</sub> = 4.4 Hz, 1H, 8-H<sub>A</sub>), 1.95 (d, <sup>2</sup>J<sub>P2H</sub> = 20.5 Hz, 1H, 9-H), 1.93-1.84 (m, 3H, 3-H<sub>A</sub> + 5H<sub>A</sub> + 7H<sub>A</sub>), 1.90 (d, <sup>3</sup>J<sub>PH</sub> = 13.0 Hz, 3H, CH<sub>3</sub>), 1.79 (apparent d of quintets, <sup>2</sup>J<sub>HH</sub> = 13.1 Hz, <sup>3</sup>J<sub>HH</sub> = 3.9 Hz, 1H, 4-H<sub>A</sub>), 1.71-1.60 (m, 2H, 5-H<sub>B</sub> + 7H<sub>B</sub>), 1.54-1.48 (m, 1H, 3-H<sub>B</sub>), 1.45-1.25 (overlapping m, 2-H + 4-H<sub>B</sub> + 8-H<sub>B</sub> + 6-H), 1.29 (d, <sup>3</sup>J<sub>P1H</sub> = 11.9 Hz, 9H, <sup>t</sup>Bu at P1) overlapping with 1.27 (d, <sup>3</sup>J<sub>P1H</sub> = 12.5 Hz, 9H, <sup>t</sup>Bu at P1), 0.91 (d, 3H, <sup>3</sup>J<sub>P2H</sub> = 9.7 Hz, CH<sub>3</sub>), 0.85 (d, 9H, <sup>3</sup>J<sub>P2H</sub> = 13.5 Hz, <sup>t</sup>Bu at P2).

<sup>1</sup>H NMR (500 MHz, toluene-*d*<sub>8</sub>, -95 °C, selected signals) 8.00 (slightly br d, <sup>3</sup>J<sub>HH</sub> = 7.3 Hz, 1H, 12-H), 7.66 (slightly br d, <sup>3</sup>J<sub>HH</sub> = 7.3 Hz, 1H, 16-H), 7.41 (two overlapping triplets, 2H, 15-H + 13-H), 6.91 (overlapping, 1H, 14-H).

<sup>13</sup>C{<sup>1</sup>H} NMR (126 MHz, C<sub>6</sub>D<sub>6</sub>): δ 173.69 (apparent t, <sup>2</sup>J<sub>P1C</sub> = <sup>2</sup>J<sub>P2C</sub> = 8.6 Hz, 11-C), 138.40 (apparent br d, <sup>3</sup>J<sub>PC</sub> = 2.7 Hz, 12-C + 16-C), 126.49 (apparent t, <sup>4</sup>J<sub>PC</sub> = 1.0 Hz, 13-C + 15-C), 120.30-120.27 (m, 14-C), 76.59 (dd, <sup>2</sup>J<sub>P2C</sub> = 13.1 Hz, <sup>2</sup>J<sub>P1C</sub> = 4.8 Hz, 1-C), 49.79 (dd, <sup>1</sup>J<sub>P2C</sub> = 22.7 Hz, <sup>3</sup>J<sub>P1C</sub> = 1.5 Hz, 10-C), 49.48 (dd, <sup>2</sup>J<sub>P2C</sub> = 12.3 Hz, <sup>2</sup>J<sub>P1C</sub> = 1.3 Hz, 9-C), 39.83 (dd, <sup>2</sup>J<sub>P1C</sub> = 7.2 Hz, <sup>4</sup>J<sub>P2C</sub> = 1.8 Hz, 2-C), 37.12 (dd, <sup>1</sup>J<sub>P1C</sub> = 17.8 Hz, <sup>3</sup>J<sub>P2C</sub> = 3.2 Hz, C(CH<sub>3</sub>)<sub>3</sub> at P1), 35.76 (d, <sup>3</sup>J<sub>P2C</sub> = 5.1 Hz, 5-C), 35.58 (dd, <sup>1</sup>J<sub>P1C</sub> = 13.4 Hz, <sup>3</sup>J<sub>P2C</sub> = 4.1 Hz, C(CH<sub>3</sub>)<sub>3</sub> at P1), 34.95 (d, <sup>2</sup>J<sub>P2C</sub> = 1.9 Hz, 6-C), 34.30 (d, <sup>1</sup>J<sub>P1C</sub> = 19.7 Hz, 7-C), 32.44 (d, <sup>3</sup>J<sub>P1C</sub> = 2.2 Hz, 3-C), 32.05 (dd, <sup>2</sup>J<sub>P1C</sub> = 5.3 Hz, <sup>4</sup>J<sub>P2C</sub> = 1.0 Hz, C(CH<sub>3</sub>)<sub>3</sub> at P1), 31.74 (dd, <sup>2</sup>J<sub>P2C</sub> = 9.4 Hz, <sup>4</sup>J<sub>P1C</sub> = 3.7 Hz, C(CH<sub>3</sub>)<sub>3</sub> at P2), 30.59 (dd, <sup>2</sup>J<sub>P1C</sub> = 4.2 Hz, <sup>4</sup>J<sub>P2C</sub> = 0.9 Hz, C(CH<sub>3</sub>)<sub>3</sub> at P1), 29.46 (d, <sup>2</sup>J<sub>P2C</sub> = 4.9 Hz, CH<sub>3</sub>), 28.12 (dd, <sup>1</sup>J<sub>P2C</sub> = 18.6 Hz, <sup>3</sup>J<sub>P1C</sub> = 1.4 Hz, 8-C), 27.50 (dd, <sup>2</sup>J<sub>P2C</sub> = 3.6 Hz, <sup>4</sup>J<sub>P1C</sub> = 1.3 Hz, C(CH<sub>3</sub>)<sub>3</sub> at P2), 25.30 (d, <sup>4</sup>J<sub>P2C</sub> = 1.5 Hz, 4-C), 22.58 (dd, <sup>2</sup>J<sub>P2C</sub> = 3.5 Hz, <sup>4</sup>J<sub>P1C</sub> = 1.5 Hz, CH<sub>3</sub>). <sup>31</sup>P{<sup>1</sup>H} NMR (202 MHz, C<sub>6</sub>D<sub>6</sub>): δ 66.36 (d, <sup>2</sup>J<sub>P1P2}</sub> = 350.3 Hz, P1), 18.63 (d, <sup>2</sup>J<sub>P1P2}</sub> = 350.3 Hz, P2).

**Hydrogenation of 4. Synthesis of complexes 5 and 6.** A J. Young NMR tube was charged with complex 4 (0.023 g, 0.035 mmol) inside a nitrogen atmosphere glovebox, followed by vacuum-transfer of 0.7 ml of C<sub>6</sub>D<sub>6</sub>. The tube was refilled with 1 atm of H<sub>2</sub> and 93:7 mixture of compounds 5 and 6 was simultaneously formed according to NMR spectroscopy.

Characterization of complex 5:

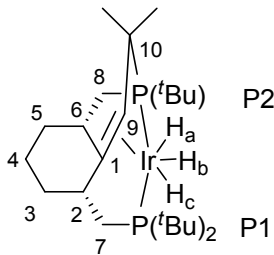

<sup>1</sup>H NMR (500 MHz, C<sub>6</sub>D<sub>6</sub>): δ 2.51 (br dd, <sup>2</sup>J<sub>P2H</sub> = 21.7 Hz, <sup>2</sup>J<sub>P1H</sub> = 3.4 Hz, 1H, 9-H), 2.37-2.31 (overlapping, m, 1H, 6-H), 2.32-2.24 (overlapping, m, 1H, 8-H<sub>A</sub>), 2.17-2.08 (m, 1H, 2-H), 2.05 (d, <sup>3</sup>J<sub>P2H</sub> = 13.1 Hz, Me), 1.93 (apparent qd, *J*<sub>1</sub> = 12.0 Hz, *J*<sub>2</sub> = 3.8 Hz, 1H, 5-H<sub>A</sub>), 1.87-1.73 (m, 3H, 5-H<sub>B</sub> and 4-H<sub>A</sub> and 3-H<sub>A</sub>), 1.62-1.59 (m, 2H, 7-H<sub>A</sub> + 7-H<sub>B</sub>), 1.48-1.39 (m, 4-H<sub>B</sub>), 1.36-1.31 (overlapping, m, 3-H<sub>B</sub>), 1.33 (overlapping, d, <sup>2</sup>J<sub>P1H</sub> = 12.0 Hz, <sup>t</sup>Bu at P1), 1.32 (overlapping, d, <sup>2</sup>J<sub>P1H</sub> = 12.7 Hz, <sup>t</sup>Bu at P1), 0.96 (d, <sup>2</sup>J<sub>P2H</sub> = 10.8 Hz, Me), 0.92 (d, <sup>2</sup>J<sub>P2H</sub> = 14.1 Hz, <sup>t</sup>Bu at P2), -9.60 (dd of apparent quintets, <sup>2</sup>J<sub>P1H</sub> = 13.8 Hz,

$^2J_{\text{P2H}} = 6.4$  Hz,  $^2J_{\text{HaHb}} \approx ^2J_{\text{HcHb}} \approx ^3J_{9\text{-HHb}} \approx ^4J_{6\text{-HHb}} \approx 1.4$  Hz, 1H, H<sub>b</sub>), -9.68 (m,  $^2J_{\text{PH}} = 13.8$  Hz,  $^2J_{\text{PH}} = 13.0$  Hz,  $^2J_{\text{HcHa}} = 10.7$  Hz, 1H, H<sub>a</sub>), -12.24 (apparent br dt,  $^2J_{\text{PH}} = 11.0$  Hz,  $^2J_{\text{PH}} = 10.7$  Hz,  $^2J_{\text{HbHa}} = 10.7$  Hz, 1H, H<sub>c</sub>).  $^{13}\text{C}\{^1\text{H}\}$  NMR (126 MHz, C<sub>6</sub>D<sub>6</sub>):  $\delta$  81.26 (m, 1-C),  $^2J_{\text{P2C}} = 14.6$  Hz, 1-C), 50.83 (d,  $^1J_{\text{P2C}} = 27.3$  Hz, 10-C), 46.11 (br d,  $^2J_{\text{P2C}} = 14.6$  Hz, 9-C), 42.03 (dd,  $^2J_{\text{P1C}} = 6.3$  Hz,  $^3J_{\text{P2C}} = 3.0$  Hz, 2-C), 38.32 (d,  $^3J_{\text{P2C}} = 5.4$  Hz, 5-C), 36.77 (m,  $^2J_{\text{P2C}} = 0.7$  Hz, 6-C), 35.83 (d,  $^1J_{\text{P2C}} = 19.9$  Hz, 8-C), 35.39 (dd,  $^1J_{\text{P1C}} = 22.7$  Hz,  $^3J_{\text{P2C}} = 4.9$  Hz, C(CH<sub>3</sub>)<sub>3</sub> at P1), 35.21 (d,  $^1J_{\text{P1C}} = 17.7$  Hz, 7-C), 34.09 (d,  $^3J_{\text{P1C}} = 1.6$  Hz, 3-C), 32.08 (dd,  $^1J_{\text{P1C}} = 5.2$  Hz,  $^3J_{\text{P2C}} = 1.1$  Hz, C(CH<sub>3</sub>)<sub>3</sub> at P1), 31.93 (d,  $^1J_{\text{P2C}} = 2.0$  Hz, CH<sub>3</sub>), 31.82 (dd,  $^1J_{\text{P1C}} = 15.6$  Hz,  $^3J_{\text{P2C}} = 4.5$  Hz, C(CH<sub>3</sub>)<sub>3</sub> at P1), 29.54 (br d,  $^3J_{\text{P1C}} = 3.4$  Hz, C(CH<sub>3</sub>)<sub>3</sub> at P1), 26.92 (dd,  $^1J_{\text{P2C}} = 9.1$  Hz,  $^3J_{\text{P1C}} = 6.6$  Hz, C(CH<sub>3</sub>)<sub>3</sub> at P1), 26.72 (dd,  $^1J_{\text{P2C}} = 5.2$  Hz,  $^3J_{\text{P1C}} = 1.4$  Hz, C(CH<sub>3</sub>)<sub>3</sub> at P2), 25.85 (d,  $^4J_{\text{P2C}} = 1.6$  Hz, 4-C), 24.85 (dd,  $^2J_{\text{P2C}} = 3.5$  Hz,  $^4J_{\text{P1C}} = 1.6$  Hz, CH<sub>3</sub>).  $^{31}\text{P}\{^1\text{H}\}$  NMR (202 MHz, C<sub>6</sub>D<sub>6</sub>):  $\delta$  75.65 (m,  $^2J_{\text{P1P2}} = 344.0$  Hz, P1), 7.23 (m,  $^2J_{\text{P1P2}} = 344.0$  Hz, P2).

Characterization of complex **6**:

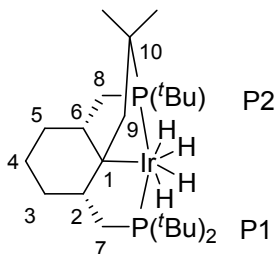

$^1\text{H}$  NMR (500 MHz, C<sub>6</sub>D<sub>6</sub>):  $\delta$  2.57-2.50 (overlapping, m, 8-H<sub>A</sub>), 2.33 (7-H<sub>A</sub>), 2.22 (9-H<sub>A</sub>), 2.14 (9-H<sub>B</sub>), 2.01 (2-H), 1.98 (7-H<sub>B</sub>), 1.79 (3-H<sub>A</sub>), 1.77 (5-H<sub>A</sub>), 1.53 ( $^3J_{\text{P2H}} = 14.1$  Hz, CH<sub>3</sub>), 1.49 (5-H<sub>B</sub>), 1.44 (8-H<sub>B</sub>), 1.42 (3-H<sub>A</sub>), 1.28 (d,  $^3J_{\text{P1H}} = 12.3$  Hz, 9H, <sup>t</sup>Bu at P1), 1.28 (overlapping, CH<sub>3</sub>) 1.23 (d,  $^3J_{\text{P1H}} = 12.2$  Hz, <sup>t</sup>Bu at P1), 1.09 (d,  $^3J_{\text{P2H}} = 13.1$  Hz, 9H, <sup>t</sup>Bu at P2) 0.97 (6-H), -10.07 (apparent t,  $^2J_{\text{PH(avg)}} = 9.5$  Hz, 4H, Ir-H).  $^{13}\text{C}\{^1\text{H}\}$  NMR (126 MHz, C<sub>6</sub>D<sub>6</sub>):  $\delta$  73.93 (d,  $^2J_{\text{P2C}} = 7.9$  Hz, 9-C), 54.05 (d,  $^2J_{\text{P2C}} = 10.1$  Hz, 1-C), 47.55 (dd,  $^2J_{\text{P1C}} = 8.1$  Hz,  $^3J_{\text{P2C}} = 5.9$  Hz, 2-C), 45.79 (d,  $^2J_{\text{P2C}} = 3.2$  Hz, 6-C), 43.56 (d,  $^1J_{\text{P2C}} = 27.0$  Hz, 10-C), 43.43 (d,  $^1J_{\text{P1C}} = 24.2$  Hz, 7-C), 39.08 (d,  $^1J_{\text{P2C}} = 31.4$  Hz, 8-C), 33.51 (dd,  $^1J_{\text{P1C}} = 17.7$  Hz,  $^3J_{\text{P2C}} = 4.2$  Hz, C(CH<sub>3</sub>)<sub>3</sub> at P1), 31.77 (d,  $^1J_{\text{P1C}} = 4.3$  Hz, C(CH<sub>3</sub>)<sub>3</sub> at P1), 30.83 (d,  $^3J_{\text{P1C}} = 5.8$  Hz, 3-C), 30.60 (d,  $^2J_{\text{P2C}} = 6.5$  Hz, CH<sub>3</sub>), 30.39 (d,  $^2J_{\text{P1C}} = 3.7$  Hz, C(CH<sub>3</sub>)<sub>3</sub> at P1), 29.92 (dd,  $^2J_{\text{P1C}} = 4.7$  Hz,  $^4J_{\text{P2C}} = 1.3$  Hz, C(CH<sub>3</sub>)<sub>3</sub> at P1), 28.56 (dd,  $^1J_{\text{P2C}} = 10.8$  Hz,  $^3J_{\text{P1C}} = 7.1$  Hz, C(CH<sub>3</sub>)<sub>3</sub> at P2), 28.28 (dd,  $^2J_{\text{P2C}} = 5.1$  Hz,  $^4J_{\text{P1C}} = 1.7$  Hz, C(CH<sub>3</sub>)<sub>3</sub> at P2), 23.35 (dd,  $^2J_{\text{P2C}} = 3.1$  Hz,  $^4J_{\text{P1C}} = 2.2$  Hz, CH<sub>3</sub>), 19.99 (d,  $^3J_{\text{P2C}} = 15.8$  Hz, 5-C), 19.08 (d,  $^4J_{\text{P2C}} = 1.9$  Hz, 4-C).  $^{31}\text{P}\{^1\text{H}\}$  NMR (202 MHz, C<sub>6</sub>D<sub>6</sub>):  $\delta$  69.77 (m,  $^2J_{\text{P1P2}} = 313.0$  Hz, P1), 61.41 (m,  $^2J_{\text{P1P2}} = 313.0$  Hz, P2).

#### Hydrogenation of **4** with cleavage of the C–C bond. Synthesis of complex **7**. A

Straus flask was charged with complex **4** (0.015 g, 0.023 mmol) inside a nitrogen atmosphere glovebox, followed by vacuum-transfer of 5 ml of benzene. The flask was cooled to -196 °C, refilled with 1 atm of H<sub>2</sub> and heated on an oil bath for 24 h at 140 °C. Evaporation of the volatiles in vacuum afforded **7** as white powder in quantitative yield.

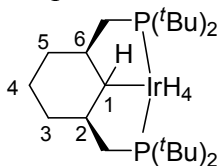

$^1\text{H}$  NMR (500 MHz,  $\text{C}_6\text{D}_6$ )  $\delta$  2.42 (br t,  $^3J_{\text{HH}} = 10.4$  Hz, 1H, 1-H), 2.12-2.04 (m, 5H,  $\text{CH}_A\text{H}_B\text{-P} + 3\text{-H}_A$  and  $5\text{-H}_A + 4\text{-H}_A$ ), 1.86-1.78 (m, 2H, 2-H + 6-H), 1.62-1.53 (m, 1H, 4- $\text{H}_B$ ), 1.35 (apparent t(vt),  $^2J_{\text{HH}} = ^3J_{\text{HH}} = 13.5$  Hz,  $|^2J_{\text{PH}} + ^4J_{\text{PH}}| = 7.8$  Hz, 2H,  $\text{CH}_A\text{H}_B\text{-P}$ ), 1.27 (vt,  $|^3J_{\text{PH}} + ^5J_{\text{PH}}| = 12.6$  Hz, 18H, 2  $^t\text{Bu}$ ), 1.23 (vt,  $|^3J_{\text{PH}} + ^5J_{\text{PH}}| = 12.6$  Hz, 18H, 2  $^t\text{Bu}$ ), 1.07-0.99 (m, 2H, 3- $\text{H}_B$  and 5- $\text{H}_B$ ), -10.11 (td,  $^2J_{\text{PH}} = 10.5$  Hz,  $^3J_{\text{HH}} = 2.2$  Hz, 4H, Ir-H).  $^{13}\text{C}\{^1\text{H}\}$  NMR (126 MHz,  $\text{C}_6\text{D}_6$ )  $\delta$  55.35 (vt,  $|^2J_{\text{PC}} + ^3J_{\text{PC}}| = 14.9$  Hz, 2-C and 6-C), 37.68 (vt,  $|^1J_{\text{PC}} + ^3J_{\text{PC}}| = 25.3$  Hz,  $\text{CH}_2\text{-P}$ ), 34.73 (vt,  $|^3J_{\text{PC}} + ^4J_{\text{PC}}| = 18.3$  Hz, 3-C and 5-C) overlapping with 34.73 (s, 1-C), 32.48 (vt,  $|^1J_{\text{PC}} + ^3J_{\text{PC}}| = 22.6$  Hz,  $\text{C}(\text{CH}_3)_3$ ), 32.02 (vt,  $|^1J_{\text{PC}} + ^3J_{\text{PC}}| = 24.3$  Hz,  $\text{C}(\text{CH}_3)_3$ ), 30.06 (br s,  $\text{C}(\text{CH}_3)_3$ ), 29.89 (vt,  $|^2J_{\text{PC}} + ^4J_{\text{PC}}| = 5.7$  Hz,  $\text{C}(\text{CH}_3)_3$ ), 28.00 (t,  $^4J_{\text{PC}} = 1.6$  Hz, 4-C).  $^{31}\text{P}\{^1\text{H}\}$  NMR (202 MHz,  $\text{C}_6\text{D}_6$ )  $\delta$  71.73 (s). IR (hexane,  $\text{cm}^{-1}$ ): 2092 (m), 2060 (m), 1940 (vs).

**Aromatization of the cyclohexane-based pincer ligand.** A Straus flask was charged with PCyP ligand (0.085 g, 0.212 mmol),  $[\text{Ir}(\text{COD})\text{Cl}]_2$  (0.071 g, 0.106 mmol) and 4 ml of toluene as well as 0.1 ml of *tert*-butylethylene inside a nitrogen atmosphere glovebox. The flask was sealed, fully immersed into an oil bath and heated at 220 °C for 48 h. The resulting solution was filtered through a thin layer of Celite and evaporated. The residue was dissolved in hexane, partially evaporated, and kept in the freezer (-20 °C) overnight. The mother liquor was decanted and the residue was washed with a small amount of cold hexane to give  $[\text{2,6-}(^t\text{Bu}_2\text{PCH}_2)_2\text{C}_6\text{H}_3]\text{IrHCl}$  (**19**) as a red powder (0.105 g, 80%). NMR spectra are consistent with the literature data<sup>1</sup>.

**Comparison of the aromatization of the cyclohexane-based pincer ligand with and without hydrogen acceptor.** Two Straus flasks were charged with  $(\text{PCyP})\text{IrHCl}$  (**1**) (0.015 g, 0.024 mmol) and 5 ml of toluene inside a nitrogen atmosphere glovebox. To one of them, 0.1 ml of *tert*-butylethylene was added. The flasks were sealed, fully immersed into the same oil bath and heated at 220 °C for specified times (note: the reaction is quite sensitive to the temperature gradients in the oil bath and to the heat flow, therefore the times may differ somewhat from the ones stated below). According to NMR monitoring, in the flask with *tert*-butylethylene, aromatization was complete within 48 h, while the flask without hydrogen acceptor contained ca. 55% **18**, 25% **1**, 10% of **19** and 10% of **21** (average from three experiments). Further heating, if the flask is not opened, does not result in any significant changes; if the flask is opened and purged with Ar several times the reaction slowly goes to completion. Therefore, for NMR monitoring of the acceptorless experiments, the flasks were not used further after being opened.

**Synthesis of carbene complex 16 and mono-dehydrogenated isomeric complexes 17.** Complex **1** (100 mg, 0.16 mmol) was placed into a Schlenk flask and heated in an oil bath for 9 h at 200 °C while passing a slow stream of argon above the flask. Periodically, the flask was removed from the oil bath and the solid which sublimed above the oil level was returned to the bottom of the flask. While several solution and solid-state techniques for thermolysis of **1** were tried, this was found to produce the best yields of compounds **16** and **17**. A mixture containing 43% of starting material, 5% of **16**, 47% of **17** (28% of one isomer and 19% of another isomer), as well as 4% of **18** and 1% of **19** was formed, which was analyzed by NMR. Despite a number of tries, including solution and solid-state thermolysis of **1** under various conditions, we were unable to obtain complex **16** in a high yield and isolate it from the other products and so far **16** and

**17** were characterized *in situ*. Attempts to isolate **16** and **17** by chromatography failed due to the instability of the compounds.

Characterization of complex **16**:

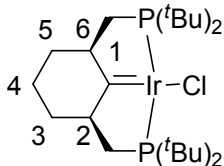

$^1\text{H}$  NMR (500 MHz,  $\text{CD}_2\text{Cl}_2$ ): selected signals:  $\delta$  2.29 ( $\text{CH}_2\text{-P}$ ), 2.02 (3-H and 5-H), 1.57 (4- $\text{H}_\text{A}$ ), 1.47 (vt,  $|^3J_{\text{PH}} + ^5J_{\text{PH}}| = 13.0$  Hz, 2  $\text{'Bu}$ ), 1.46 (4- $\text{H}_\text{B}$ ), -4.02 (m, 2H, 2-H + 6-H).  $^{13}\text{C}\{^1\text{H}\}$  NMR (126 MHz,  $\text{CD}_2\text{Cl}_2$ ):  $\delta$  246.93 (s, 1-C), 75.03 (vt,  $|^2J_{\text{PC}} + ^3J_{\text{PC}}| = 20.8$  Hz, 2-C + 6-C), 30.63 (overlapping,  $\text{CH}_2\text{-P}$ ) 30.52 (vt,  $|^2J_{\text{PC}} + ^4J_{\text{PC}}| = 5.8$  Hz,  $\text{C}(\text{CH}_3)_3$ ), 29.93 (3-C + 5-C), 26.63 (t,  $^4J_{\text{PC}} = 1.9$  Hz, 4-C).  $^{31}\text{P}\{^1\text{H}\}$  NMR (202 MHz,  $\text{CD}_2\text{Cl}_2$ ):  $\delta$  66.67 (s, 2P).

Characterization of isomeric compounds **17**:

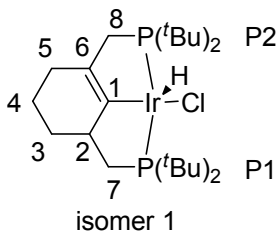

$^1\text{H}$  NMR (500 MHz,  $\text{C}_6\text{D}_6$ ):  $\delta$  2.52 (overlapping, 8- $\text{H}_\text{A}$ ), 2.51 (overlapping, 2-H), 2.25 (overlapping, 3- $\text{H}_\text{A}$  + 3- $\text{H}_\text{B}$ ), 2.23 (overlapping, 8- $\text{H}_\text{B}$ ), 2.11 (overlapping, 5- $\text{H}_\text{A}$ ), 2.02 (overlapping, 7- $\text{H}_\text{A}$ ), 1.91 (m, 1H, overlapping 4-H and 4-H'), 1.65 (m, 1H, overlapping 4-H and 4-H'), 1.37-1.25 (overlapping, 4  $\text{'Bu}$ ), 1.24 (overlapping, 7- $\text{H}_\text{B}$ ), 1.13 (dt,  $^2J_{\text{HH}} = 13.6$  Hz,  $^3J_{\text{HH}} = 6.9$  Hz, 1H, 5- $\text{H}_\text{B}$ ), -41.25 (apparent t,  $^2J_{\text{P1H}} = ^2J_{\text{P2H}} = 13.2$  Hz, 1H, Ir-H).  $^{13}\text{C}\{^1\text{H}\}$  NMR (126 MHz,  $\text{C}_6\text{D}_6$ ):  $\delta$  138.01 (dd,  $^2J_{\text{P2C}} = 10.7$  Hz,  $^3J_{\text{P1C}} = 5.1$  Hz, 6-C), 137.52 (dd,  $^2J_{\text{CH}} = 6.3$  Hz,  $^2J_{\text{P2C}} = 1.4$  Hz, 1-C), 49.26 (dd,  $^2J_{\text{P1C}} = 8.4$  Hz,  $^3J_{\text{P2C}} = 3.5$  Hz, 2-C), 38.08 (d,  $^1J_{\text{P2C}} = 25.9$  Hz, 8-C), 37.67-37.43 (overlapping, 3  $\text{C}(\text{CH}_3)_3$  and  $\text{C}(\text{CH}_3)_3$  from isomer 2), 34.8 (overlapping, 5-C), 34.29 (overlapping,  $\text{C}(\text{CH}_3)_3$ ), 32.42 (dd,  $^1J_{\text{P1C}} = 16.3$  Hz,  $^3J_{\text{P2C}} = 0.8$  Hz, 7-C), 30.87 (dd,  $^2J_{\text{PC}} = 3.7$  Hz,  $^4J_{\text{PC}} = 1.3$  Hz,  $\text{C}(\text{CH}_3)_3$ ), 30.47 (dd,  $^2J_{\text{PC}} = 3.5$  Hz,  $^4J_{\text{PC}} = 1.3$  Hz,  $\text{C}(\text{CH}_3)_3$ ), 30.39 (d,  $^3J_{\text{P1C}} = 13.4$  Hz, 3-C), 30.02 (dd,  $^2J_{\text{PC}} = 3.5$  Hz,  $^4J_{\text{PC}} = 1.4$  Hz,  $\text{C}(\text{CH}_3)_3$ ), 29.85 (dd,  $^2J_{\text{PC}} = 3.3$  Hz,  $^4J_{\text{PC}} = 1.5$  Hz,  $\text{C}(\text{CH}_3)_3$ ), 24.75-24.68 (m, overlapping 4-C and 4-C').  $^{31}\text{P}\{^1\text{H}\}$  NMR (202 MHz,  $\text{C}_6\text{D}_6$ ):  $\delta$  67.65, 64.87 (AB part of ABX,  $^2J_{\text{P1P2}} = 336.8$  Hz,  $^2J_{\text{P1H}} = ^2J_{\text{P2H}} = 13.2$  Hz).

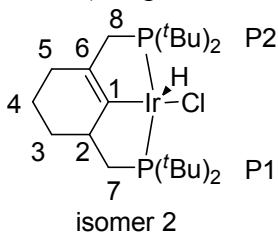

$^1\text{H}$  NMR (500 MHz,  $\text{C}_6\text{D}_6$ ):  $\delta$  2.67 (m,  $^2J_{\text{HH}} = 17.2$  Hz, 2H, 8- $\text{H}_\text{A}$ ), 2.54 (overlapping, 3- $\text{H}_\text{A}$ ), 2.35 (apparent ddt,  $^2J_{\text{HH}} = 17.2$  Hz,  $^2J_{\text{P2H}} = 10.1$  Hz,  $^4J_{\text{HH}} = ^4J_{\text{P1H}} = 2.3$  Hz, 8- $\text{H}_\text{B}$ ), 2.13 (overlapping, 3- $\text{H}_\text{B}$ ), 1.99 (overlapping, 7- $\text{H}_\text{A}$ ), 1.94 (overlapping, 5- $\text{H}_\text{A}$ ), 1.91



(overlapping, 4-H and 4-H'), 1.65 (m, 1H, overlapping 4-H and 4-H'), 1.41 (d,  $^3J_{\text{PH}} = 12.4$  Hz, 'Bu), 1.38 (overlapping, 7-H<sub>B</sub>), 1.31 (overlapping, 5-H<sub>B</sub>), 1.30-1.23 (overlapping, 2 'Bu), 1.20 (d,  $^3J_{\text{PH}} = 12.2$  Hz, 'Bu), -44.63 (apparent,  $^2J_{\text{PIH}} = ^2J_{\text{P2H}} = 12.2$  Hz, 1H, Ir-H).  $^{13}\text{C}\{^1\text{H}\}$  NMR (126 MHz, C<sub>6</sub>D<sub>6</sub>):  $\delta$  143.35 (d,  $^2J_{\text{CH}} = 3.6$  Hz, 1-C), 139.43 (dd,  $^2J_{\text{P2C}} = 12.0$  Hz,  $^3J_{\text{P1C}} = 5.3$  Hz, 6-C), 52.44 (dd,  $^2J_{\text{P1C}} = 9.1$  Hz,  $^3J_{\text{P2C}} = 3.9$  Hz, 2-C), 37.99 (d,  $^2J_{\text{P2C}} = 25.8$  Hz, 8-C), 37.67-37.43 (overlapping, C(CH<sub>3</sub>)<sub>3</sub> and 3 C(CH<sub>3</sub>)<sub>3</sub> from isomer 1), 36.31 (dd,  $^1J_{\text{PC}} = 16.1$  Hz,  $^3J_{\text{PC}} = 4.7$  Hz, C(CH<sub>3</sub>)<sub>3</sub>), 35.24 (dd,  $^1J_{\text{PC}} = 16.6$  Hz,  $^3J_{\text{PC}} = 3.9$  Hz, C(CH<sub>3</sub>)<sub>3</sub>), 34.5 (overlapping, 5-C), 32.65 (d,  $^2J_{\text{P1C}} = 16.3$  Hz, 7-C), 30.18 (d,  $^3J_{\text{P1C}} = 14.2$  Hz, 3-C), 29.48 (overlapping, dd,  $^2J_{\text{PC}} = 3.6$  Hz,  $^4J_{\text{PC}} = 1.7$  Hz, C(CH<sub>3</sub>)<sub>3</sub>), 29.11 (m, overlapping 2 C(CH<sub>3</sub>)<sub>3</sub>), 28.80 (dd,  $^2J_{\text{PC}} = 3.7$  Hz,  $^4J_{\text{PC}} = 1.4$  Hz, C(CH<sub>3</sub>)<sub>3</sub>), 24.75-24.68 (m, overlapping 4-C and 4-C').  $^{31}\text{P}\{^1\text{H}\}$  NMR (202 MHz, C<sub>6</sub>D<sub>6</sub>):  $\delta$  66.60, 62.96 (AB part of ABX,  $^2J_{\text{P1P2}} = 335.0$  Hz,  $J_{\text{PH}}$  not completely resolved due to broadening of signals).

**Hydrogenation of 16, 17 and 18.** A solution of complex **1** (0.015 g, 0.024 mmol) in 5 ml of toluene in a sealed Straus flask was heated for 2 h at 205 °C, and a mixture of **1**, **16**, **17**, and **18** was formed according to NMR. The solution was degassed, cooled to -196 °C and the flask was refilled with H<sub>2</sub>. Upon heating the solution for 6 h at 155 °C, a clean and quantitative conversion to **1** was observed.

**Attempted hydrogenation of 19.** A degassed solution of benzene-based complex **19** (0.015 g, 0.024 mmol) in 5 ml of toluene in a sealed Straus flask was cooled to -196 °C and the flask was refilled with H<sub>2</sub>. After this, the flask was fully immersed into an oil bath and heated; at temperatures up to 215 °C, no formation of hydrogenated products was observed.

**Synthesis of diene complex 18 and C-C coupling product 21.** A Straus flask was charged with PCyP ligand (0.150 g, 0.374 mmol), [Ir(COD)Cl]<sub>2</sub> (0.126 g, 0.188 mmol) and 6 ml of toluene as well as 0.1 ml of *tert*-butylethylene inside a nitrogen atmosphere glovebox. The flask was sealed, fully immersed into an oil bath and heated at 210 °C for 32 h. According to NMR, at that moment the reaction mixture contained 75% of **18** and 12% of **21**, and small amounts of **1** and **19** as well as traces of **16** and **17**. The volatiles were removed in vacuum and the residue was chromatographed under inert atmosphere on alumina, which was preliminary heated for 2 h at ca. 150 °C under vacuum. Dry and degassed benzene-hexane 1:1 mixture was used as eluent. As far as color changes are difficult to distinguish and target compounds rapidly decompose on TLC plates, NMR monitoring was required. Compounds **21** and **1** were eluted first, together with some amount of **18**. These fractions were evaporated, the residue was dissolved in a minimum amount of hexane at 120 °C into a Straus flask and the flask was allowed to reach ambient temperature. Relatively large, yellow crystals of **21** were formed which could be readily separated from the rest of solid material. Yield: 0.013 g, 6%. The middle fractions contained complex **18** in an up to 90% purity, while complex **16** eluted the last. Those middle fractions were evaporated and subjected to another chromatography on silica, which was preliminary heated for 2 h at ca. 150 °C under vacuum. Dry and degassed benzene was used as eluent. Complex **19** was eluting first together with **18**, while the next colored fractions contained pure **18**. After evaporating the volatiles and drying in vacuum complex **18** was obtained as a red-orange powder. Yield: 0.036 g, 15%.

Characterization of complex **18**:

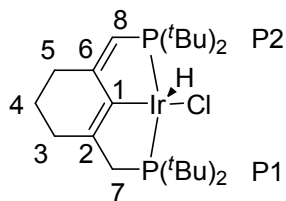

Anal. Calc. for  $C_{24}H_{46}ClIrP_2$ : C, 46.18; H, 7.43. Found C, 46.09, H, 7.47.  $^1H$  NMR (500 MHz,  $C_6D_6$ ):  $\delta$  5.61 (br d,  $^2J_{P_2H} = 8.0$  Hz, 1H, 8-H), 2.66-2.61 (m, 1H, 5- $H_A$ ), 2.54-2.44 (m, 3H, 5- $H_B$  and 7- $H_A$  + 7- $H_B$ ), 2.28 (apparent dt,  $^2J_{HH} = 17.1$  Hz,  $^3J_{HH} = 5.4$  Hz, 1H, 3- $H_A$ ), 2.15 (overlapping apparent dt,  $^2J_{HH} = 17.1$  Hz,  $^3J_{HH} = 6.3$  Hz, 1H, 3- $H_B$ ), 1.74-1.61 (m, 2H, 4- $H_A$  + 4- $H_B$ ), 1.37-1.32 (m, 27H, 3 tBu), 1.25 (d,  $^2J_{PH} = 12.9$  Hz, 9H, tBu), -43.30 (apparent t,  $^2J_{P_1H} = ^2J_{P_2H} = 12.7$  Hz, 1H, Ir-H).  $^{13}C\{^1H\}$  NMR (126 MHz,  $C_6D_6$ ):  $\delta$  171.37 (dd,  $^2J_{P_2C} = 20.1$  Hz,  $^3J_{P_1C} = 4.0$  Hz, 6-C), 147.99 (dd,  $^2J_{P_1C} = 12.1$  Hz,  $^3J_{P_2C} = 4.3$  Hz, 2-C), 134.89 (ddd,  $^2J_{CH} = 6.3$  Hz,  $^2J_{P_2C} = 2.4$  Hz,  $^2J_{P_1C} = 0.8$  Hz, 1-C), 117.40 (d,  $^1J_{P_2C} = 44.4$  Hz, 8-C), 38.63 (dd,  $^1J_{PC} = 20.1$  Hz,  $^3J_{PC} = 3.3$  Hz,  $C(CH_3)_3$ ), 38.43 (d,  $^1J_{P_1C} = 26.7$  Hz, 7-C), 37.10 (dd,  $^1J_{PC} = 15.3$  Hz,  $^3J_{PC} = 3.9$  Hz,  $C(CH_3)_3$ ), 34.62 (dd,  $^1J_{P_1C} = 17.0$  Hz,  $^3J_{P_2C} = 3.5$  Hz,  $C(CH_3)_3$  at P1), 34.44 (dd,  $^1J_{PC} = 21.1$  Hz,  $^3J_{PC} = 4.5$  Hz,  $C(CH_3)_3$ ), 30.37 (d,  $^3J_{P_2C} = 17.1$  Hz, 5-C), 30.29 (d,  $^3J_{P_1C} = 14.2$  Hz, 3-C), 29.95 (dd,  $^2J_{PC} = 3.8$  Hz,  $^4J_{PC} = 1.4$  Hz,  $C(CH_3)_3$ ), 29.48 (m, 2  $C(CH_3)_3$  at P2), 29.36 (dd,  $^2J_{P_1C} = 3.8$  Hz,  $^4J_{P_2C} = 1.4$  Hz,  $C(CH_3)_3$  at P1), 24.75 (d,  $^4J_{P_2C} = 1.0$  Hz, 4-C).  $^{31}P\{^1H\}$  NMR (202 MHz,  $C_6D_6$ ):  $\delta$  67.73 (dd,  $^2J_{P_1P_2} = 334.3$ ,  $^2J_{P_1H} = 12.7$  Hz, P1), 60.33 (dd,  $^2J_{P_21} = 334.3$ ,  $^2J_{P_1H} = 12.7$  Hz, P2).

Characterization of complex **21**:

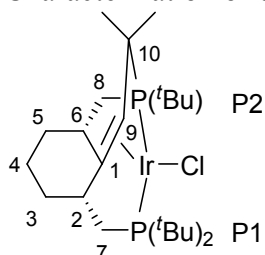

$^1H$  NMR (500 MHz,  $C_6D_6$ ):  $\delta$  2.00 (apparent tdd,  $^2J_{HH} = ^2J_{P_2H} = 13.4$  Hz,  $^3J_{HH} = 8.4$  Hz,  $^4J_{P_1H} = 5.0$  Hz, 1H, 8- $H_A$ ), 1.92-1.83 (m, 2H, 3- $H_A$  + 5- $H_A$ ), 1.88 (d,  $^3J_{P_2H} = 12.8$  Hz, 3H,  $CH_3$ ), 1.72 (apparent d of quintets,  $^2J_{HH} = 13.2$  Hz,  $^3J_{HH} = 3.4$  Hz, 1H, 4- $H_A$ ), 1.64-1.59 (m, 1H, 5- $H_B$ ), 1.52 (overlapping, d,  $^3J_{PH} = 22$  Hz, 1H, 9-H), 1.52 (d,  $^3J_{P_1H} = 12.6$  Hz, 9H, tBu at P1), 1.51-1.46 (overlapping, m, 1H, 7- $H_A$ ), 1.43-1.30 (m, 4H, 3- $H_B$  + 4- $H_B$  + 7- $H_B$  + 8- $H_B$ ), 1.37 (d,  $^3J_{P_1H} = 11.8$  Hz, 9H, tBu at P1), 1.22-1.06 (m, 2H, 2-H + 6-H), 1.13 (d,  $^3J_{P_2H} = 13.9$  Hz, 9H, tBu at P2), 0.84 (d,  $^3J_{P_2H} = 10.0$  Hz, 3H,  $CH_3$ ).  $^{13}C\{^1H\}$  NMR (126 MHz,  $C_6D_6$ ):  $\delta$  63.60 (dd,  $^2J_{P_2C} = 11.9$  Hz,  $^2J_{P_1C} = 5.0$  Hz, 1-C), 50.14 (dd,  $^1J_{P_2C} = 23.6$  Hz,  $^3J_{P_1C} = 1.3$  Hz, 10-C), 41.05 (dd,  $^2J_{P_1C} = 7.5$  Hz,  $^3J_{P_2C} = 2.0$  Hz, 2-C), 36.37-36.31 (m, overlapping 5-C + 6-C), 35.89 (dd,  $^1J_{P_1C} = 19.1$  Hz,  $^3J_{P_2C} = 3.3$  Hz,  $C(CH_3)_3$  at P1), 35.28 (dd,  $^2J_{P_2C} = 13.7$  Hz,  $^2J_{P_1C} = 1.4$  Hz, 9-C), 34.91 (dd,  $^1J_{P_1C} = 12.0$  Hz,  $^3J_{P_2C} = 4.7$  Hz,  $C(CH_3)_3$  at P1), 33.88 (s, 3-C), 33.14 (dd,  $^2J_{P_1C} = 4.9$  Hz,  $^4J_{P_2C} = 1.2$  Hz,  $C(CH_3)_3$  at P1), 32.55 (dd,  $^1J_{P_2C} = 10.0$  Hz,  $^3J_{P_1C} = 3.4$  Hz,  $C(CH_3)_3$  at P2), 29.69 (dd,  $^2J_{P_1C} = 3.4$  Hz,  $^4J_{P_1C} = 1.1$  Hz,  $C(CH_3)_3$  at P1), 29.44 (d,  $^2J_{P_2C} = 4.6$  Hz,  $CH_3$ ), 28.72 (dd,  $^1J_{P_1C} = 19.5$  Hz,  $^3J_{P_2C} = 1.5$  Hz, 7-C), 27.49 (dd,  $^1J_{P_2C} = ca. 18$  Hz,  $^3J_{P_1C} = 1.0$  Hz, 8-C, overlapping with tBu), 27.40 (dd,  $^2J_{P_2C} = 3.8$  Hz,  $^4J_{P_1C} = 1.4$  Hz,  $C(CH_3)_3$  at P2), 26.72 (d,

$^3J_{\text{P1C}} = 1.5$  Hz, 4-C), 21.40 (dd,  $^2J_{\text{P2C}} = 3.6$  Hz,  $^4J_{\text{P1C}} = 1.0$  Hz, CH<sub>3</sub>).  $^{31}\text{P}\{^1\text{H}\}$  NMR (202 MHz, C<sub>6</sub>D<sub>6</sub>):  $\delta$  66.28 (d,  $^2J_{\text{P1P2}} = 370.0$  Hz), 23.74 (d,  $^2J_{\text{P1P2}} = 370.0$  Hz).

**Crystallography.** Intensity data were collected at 293 K with an Oxford Diffraction Xcalibur 3 system using  $\omega$ -scans and Mo-K $\alpha$  ( $\lambda = 0.71073$  Å). CCD data were extracted and integrated using CrysAlis RED<sup>2</sup>. The structures were solved using direct methods and refined by full-matrix least-squares calculations on  $F^2$  using SHELXTL 5.1<sup>3</sup>. Non-H atoms were refined with anisotropic displacement parameters. Hydrogen atoms were constrained to parent sites, using a riding model.

**Table 1.** Crystal data collection and refinement details for compounds **3-anti**, **4** and **21**.

|                                          | <b>3-anti</b>                                     | <b>4</b>                                         | <b>21</b>                                          |
|------------------------------------------|---------------------------------------------------|--------------------------------------------------|----------------------------------------------------|
| formula                                  | C <sub>31</sub> H <sub>55</sub> IrOP <sub>2</sub> | C <sub>30</sub> H <sub>51</sub> IrP <sub>2</sub> | C <sub>24</sub> H <sub>46</sub> ClIrP <sub>2</sub> |
| Fw                                       | 697.89                                            | 665.85                                           | 624.20                                             |
| crystal system                           | monoclinic                                        | triclinic                                        | monoclinic                                         |
| space group                              | P2 <sub>1</sub> /c                                | P-1                                              | P2 <sub>1</sub> /c                                 |
| color                                    | colorless                                         | red                                              | yellow                                             |
| $a/\text{Å}$                             | 17.0030(5)                                        | 10.264(5)                                        | 11.4108(10)                                        |
| $b/\text{Å}$                             | 20.0591(5)                                        | 16.311(5)                                        | 13.6574(12)                                        |
| $c/\text{Å}$                             | 9.4403(3)                                         | 19.425(5)                                        | 17.7933(15)                                        |
| $\alpha/\text{deg}$                      | 90                                                | 103.753(5)                                       | 90                                                 |
| $\beta/\text{deg}$                       | 102.986(3)                                        | 105.008(5)                                       | 104.097(8)                                         |
| $\gamma/\text{deg}$                      | 90                                                | 93.129(5)                                        | 90                                                 |
| $V/\text{Å}^3$                           | 3137.42(16)                                       | 3027.6(19)                                       | 2689.4(4)                                          |
| temperature, K                           | 293                                               | 293                                              | 293                                                |
| $Z$                                      | 4                                                 | 4                                                | 4                                                  |
| $D_{\text{calcd}}/\text{g cm}^{-3}$      | 1.306                                             | 1.461                                            | 1.542                                              |
| $\mu/\text{mm}^{-1}$                     | 4.379                                             | 4.531                                            | 5.191                                              |
| $\theta/\text{range/deg}$                | 2.46-29.01                                        | 2.54-28.39                                       | 2.44-28.99                                         |
| no. reflns collected                     | 23942                                             | 65691                                            | 30088                                              |
| no. of unique reflns                     | 7396                                              | 14034                                            | 6485                                               |
| $R(F)$ ( $I > 2\sigma(I)$ ) <sup>a</sup> | 0.0572                                            | 0.0350                                           | 0.0260                                             |
| $wR2(F^2)$ (all data) <sup>b</sup>       | 0.1144                                            | 0.0915                                           | 0.0788                                             |
| $S^c$                                    | 1.056                                             | 1.222                                            | 1.269                                              |
| $R_{\text{int}}$                         | 0.0600                                            | 0.0463                                           | 0.0324                                             |

<sup>a</sup>  $R = \sum(|F_o| - |F_c|) / \sum |F_o|$ . <sup>b</sup>  $wR2 = [\sum w(F_o^2 - F_c^2)^2 / \sum (F_o^2)^2]^{1/2}$ . <sup>c</sup>  $S = [\sum w(F_o^2 - F_c^2)^2 / (n-p)]^{1/2}$ .

## 2. Computational part

### Summary of Additional Computational Results

All Density Functional Theory (DFT) calculations were carried out with Jaguar 7.6 program package by Schrödinger LLC<sup>4</sup>. For geometry optimization, solvation energy and frequency calculations, Becke's three-parameter hybrid functional and the LYP correlation functional (B3LYP)<sup>5,6</sup> was used with LACVP\*\* level core potential and basis set, while single point energy corrections were performed with the M06<sup>7</sup>, M06-L<sup>8</sup> or B3LYP-D3<sup>9</sup> functional using the LACV3P\*\*++ basis set which, as suggested by Martin<sup>10</sup>, was augmented with two f-polarization functions on Ir. Frequency calculations at the same level were performed on the optimized geometries to verify that the geometries correspond to minima (no imaginary frequency) or transition states (one imaginary frequency) and to provide the thermochemical data at different temperatures (298 K, 393 K and 413 K), which include entropy contributions. Single-point solvation energies were also calculated using the Poisson-Boltzmann reactive field implemented in Jaguar 7.6 (PBF)<sup>11</sup> with standard parameters for benzene. The Gibbs free energies were defined as following equation:

$$G = E(\text{B3LYP-D3/LACV3P**++2f on Ir}) + G_{\text{solv}} + \text{ZPE} + H_{298} - TS_{298} + 1.9$$

[concentration correction to the free energy of solvation from M(g) → M(aq) to atm(g) → M(aq)].

### Choice of functional: M06, M06-L versus B3LYP-D3

Since DFT studies for iridium complex with PCP pincer ligands with different density functionals have been reported<sup>12</sup>, we carried out comparable calculations using these three functionals (M06, M06-L and B3LYP-D3). In general all the calculations follow the same trend and agree with the experimental data, however the agreement with the experimental observations is a bit larger with the density functional B3LYP-D3. Therefore, we believe that the results from B3LYP-3/ LACV3P\*\*++ method are more reliable.

**Hydrogenation of 4.** DFT calculations on the reaction of complex **4** with dihydrogen confirmed the experimental observation that complexes **5** and **6** are in equilibrium depending on the temperature and hydrogen-pressure used in the reaction (Figure 2). The formation of complex **6** occurs, through H<sub>2</sub>- addition to complex **4** forming the Ir(III) complex **5**. After this, Ir-H insertion into the double bond of the pincer ligand leads to the intermediate **8**. This Ir(III) complex undergoes an oxidative addition to form the experimentally observed Ir(V) complex **6**. The activation energy barrier for this conversion is calculated to be 20.5 kcal/mol *via* **TS8-5**. The calculations showed that complex **6** is more stable than intermediate **8** (under dihydrogen atmosphere). Depending on the choice of functional to calculate the electronic energy, (a) M06, (b) M06-L, or (c) B3LYP-D3, they all favor formation of complex **6** vs complex **8**, however the preference for **6** over **8** is a bit larger with B3LYP-D3 in agreement with the experimental observations. The equilibrium between **5** and **6** appears to be most accurate with B3LYP-D3 followed by M06 and M06-L (Figure S1).

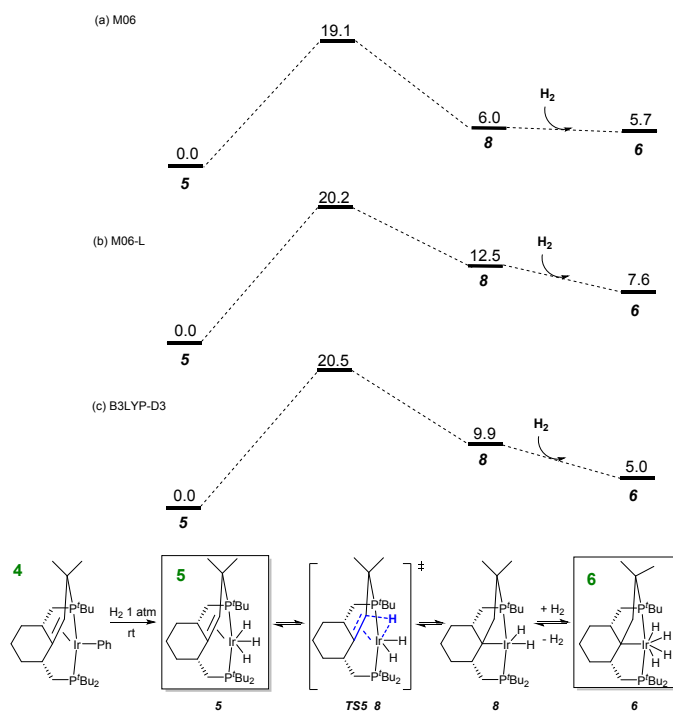

**Figure S1.** Profile of the calculated relative  $G$  (kcal/mol) for the formation of mixture of complexes **5** and **6** from complex **4** at 25 °C (a) M06 functional, (b) M06-L, (c) B3LYP-D3

Different mechanistic scenarios were considered for the formation of complex **7** at the experimental conditions (5 atm of  $H_2$ , 140 °C) (Figure S2). The green and black paths of Figure S2 shows how complex **5**, *via* intermediate **8** undergoes an  $\alpha$ -alkyl elimination to form carbene **9**. The activation barrier is calculated at 31.4 kcal/mol *via* transition state **TS8-9** (See Figure S3 for a more detailed picture of transition states). Complex **9** proceeds through an  $\alpha$ -insertion to form intermediate **10**, which under hydrogen atmosphere conditions undergoes a  $H_2$  addition that finally forms the more stable Ir(V) complex **11**. The transition state **TS9-10** is calculated at 25.8 kcal/mol on the free energy surface. This step is followed by C–H reductive elimination from Ir–C<sub>sp3</sub> and Ir–H, which leads to formation of a new C<sub>sp3</sub>–H bond in the pincer ligand, a phosphorus-bound *tert*-butyl group. The free energy barrier *via* transition state **TS11-12** is calculated to be 11.8 kcal/mol. Finally the process finishes with an oxidative addition of one dihydrogen molecule leading to Ir(V)H<sub>4</sub> complex **7**. The overall activation free energy corresponds to the C–C bond cleavage step (31.4 kcal/mol). Note that the results that are reported here have been calculated at 1 atm of  $H_2$ , and the experimental were carried out at 5 atm. The effect of the pressure can affect the total values around  $\approx 1$  kcal. Other mechanistic proposals are evaluated in Figure S2 for the formation of complex **7**: (a) through complex **22**, and (b) through complex **13**. (A) Carbene **9** can undergo a reductive elimination forming the C–H bond and generating Ir complex **22**. This transition state has a free energy barrier of 41.0 kcal/mol. By comparing with the green  $\alpha$ -insertion pathway, it is clear that this path is essentially impossible under the experimental conditions, and the reaction favorably goes *via* transition state **TS9-10**. (B) Through complex **13** (figure 2b), there are two possible alternative pathways. From

complex **8**, a reductive elimination step can occur to generate intermediate **13** with a plausible free energy barrier for the transition state (23.7 kcal/mol), followed by a C–C oxidative addition that leads to complex **10**. The free energy of the transition state **TS13-10** is 53.6 kcal/mol. Alternatively, from complex **13**, an oxidative addition of a dihydrogen molecule to Ir can occur to form complex **14** which undergoes C–C oxidative addition generating complex **11**. The activation energy barrier for this pathway is even higher at 62.9 kcal/mol *via* **TS14-11**. It can clearly be concluded, similarly to the statement above, that the proposal the green  $\alpha$ -insertion pathway is the most plausible pathway due to the significantly lower free energy barriers, (**TS9-8** : 31.4 kcal/mol) vs (**TS13-10** : 53.6 kcal/mol) and (**TS14-11** : 62.9 kcal/mol).

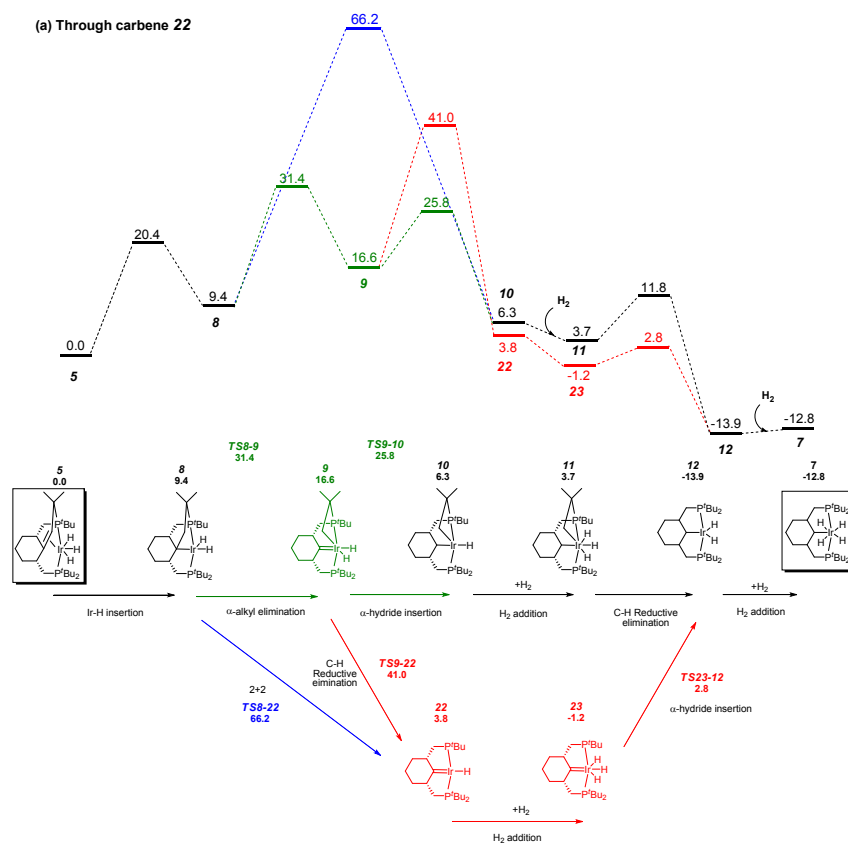

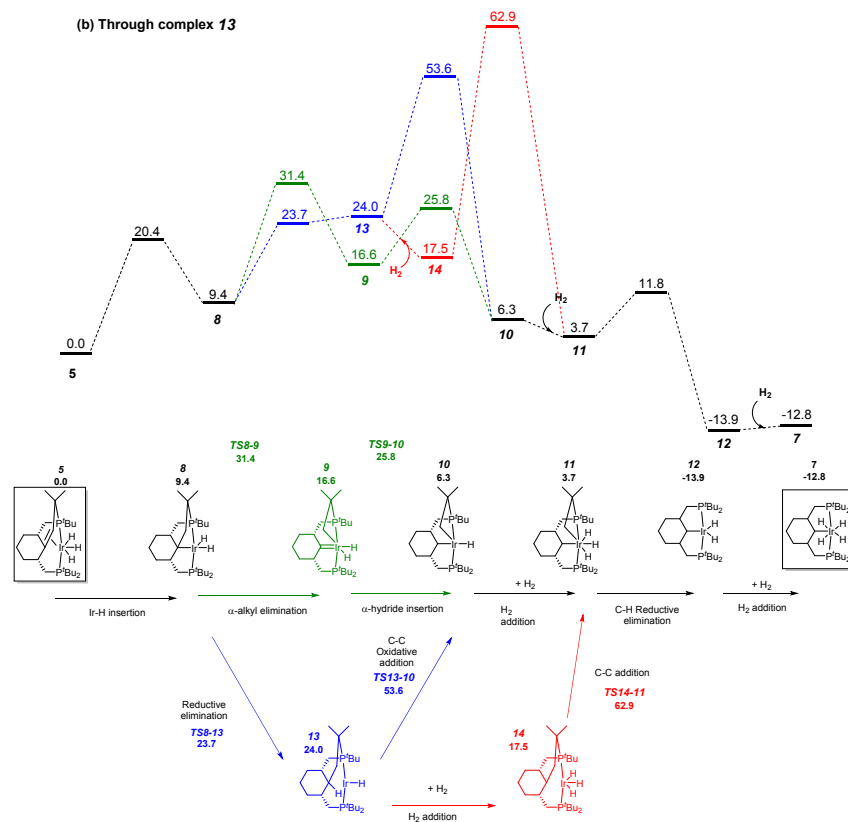

**Figure S2.** Proposed pathways for the formation of complex 7 from complex 5: (a) through carbene 22; (b) through complex 13. The relative Gibbs free energies are given in kcal/mol. In both a) and b) the lowest energy pathway is marked by green and black and involves formation of carbene 9.

**Figure. S3.** Optimized structures for intermediate 9/10 and transition states TS8-9/TS9-10, TS8-13/TS13-10 and TS14-11/TS9-22/TS8-22. Relative energies are given in kcal/mol and distances in Å.

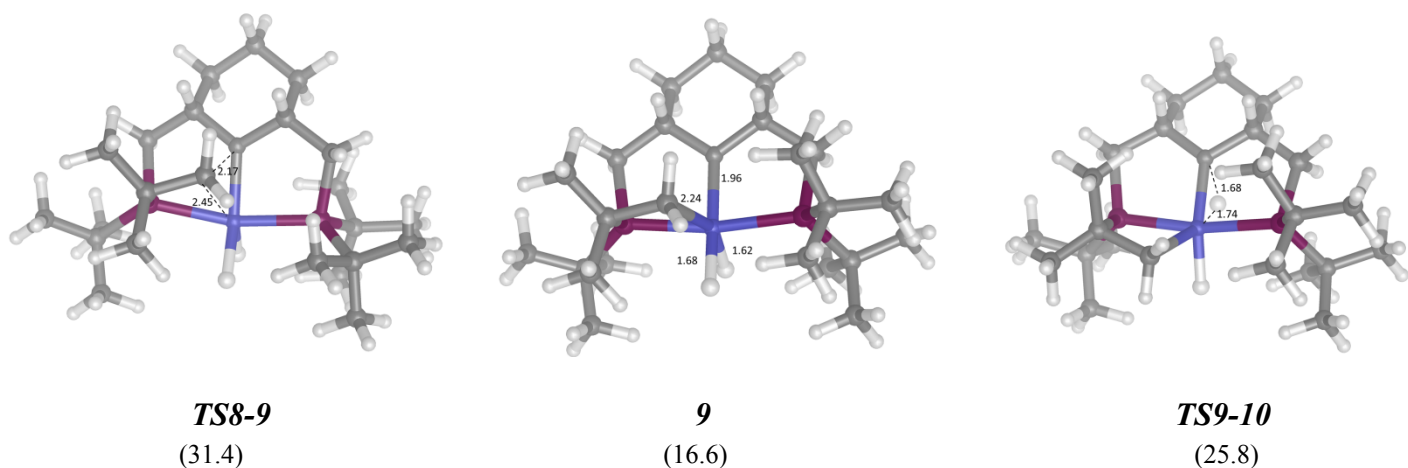

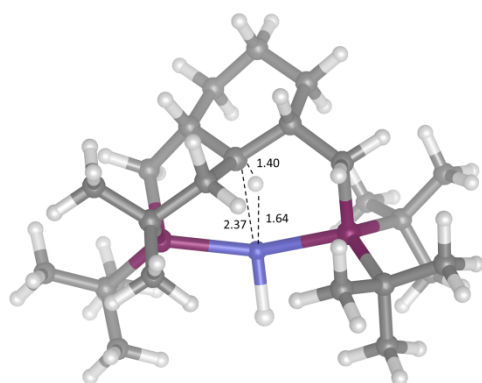

**TS8-13**  
(23.7)

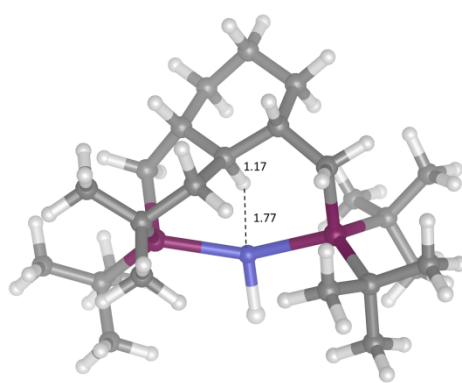

**13**  
(24.0)

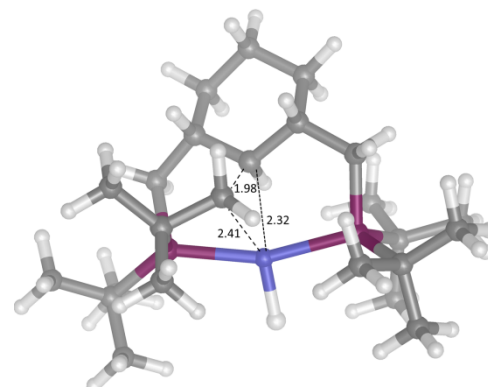

**TS13-10**  
(53.6)

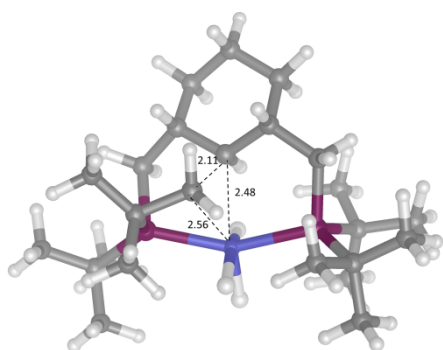

**TS14-11**  
(62.9)

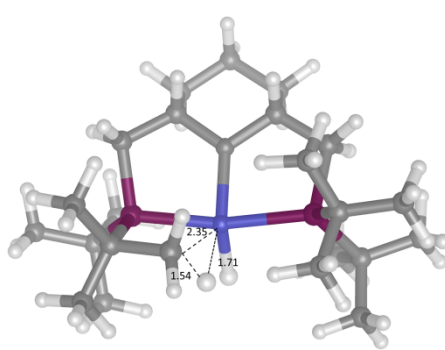

**TS9-22**  
(41.0)

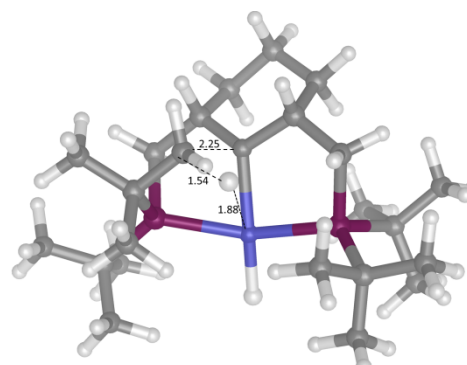

**TS8-22**  
(66.2)

**Carbon-carbon bond formation.** As mentioned, it was found experimentally that the formation of complex **7** is reversible, proceeding in one direction or other depending on the reaction conditions. In the presence of a hydrogen atmosphere, complex **7** is obtained quantitatively, and in the presence of a hydrogen acceptor, such as *tert*-butylethylene, the forward reaction occurs leading to the olefin complex **15** (Figure S7). Complex **12** proceeds through a C–H oxidative addition process forming Ir(V) complex **11**. The free energy barrier via transition state **TS12-11** is calculated to be 25.6 kcal/mol. This step is the only one that is feasible for both conditions (under H<sub>2</sub> and in the presence of *tert*-butylethylene). In the reaction with *tert*-butylethylene, complex **11** goes through reductive elimination followed by  $\alpha$ -elimination forming iridium complex carbene **9**. The activation barrier is calculated at 22.6 kcal/mol via transition state **TS10-9**. Complex **9** via C–C coupling transition state **TS9-8** (28.0 kcal/mol) leads to the formation of intermediate **8**, which proceeds through  $\beta$ -elimination and finally reductive elimination to



generate the more stable complex **15**. The activation barrier is calculated at 17.0 kcal/mol *via* transition state **TS8-5**. In the reaction with *tert*-butylethylene, the overall activation energy barrier corresponds to the C–C bond formation step (**TS9-8**) that is 28.0 kcal/mol. The forward reaction is not possible under hydrogen pressure due to the higher energy barriers. Under hydrogen pressure, the formation of complex **5** needs to cross over a free energy barrier of 45.7 kcal/mol (**TS9-8**), that makes this C–C coupling step unfavorable under these conditions.

Figures S4-S7 list the energy profiles calculated using various functionals ((a) M06 functional, (b) M06-L, (c) B3LYP-D3)

(a) M06

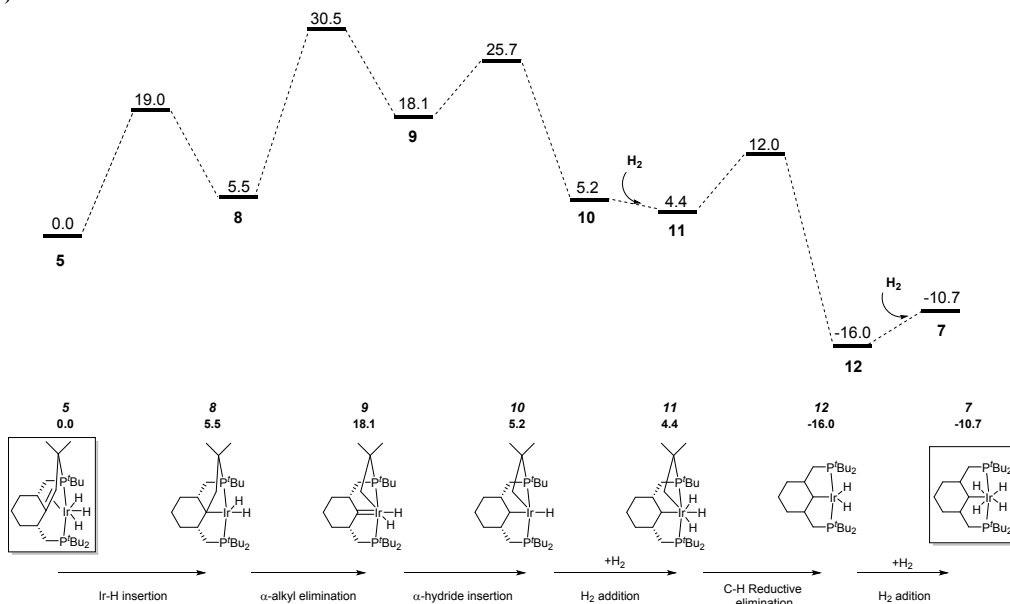

(b) M06-L

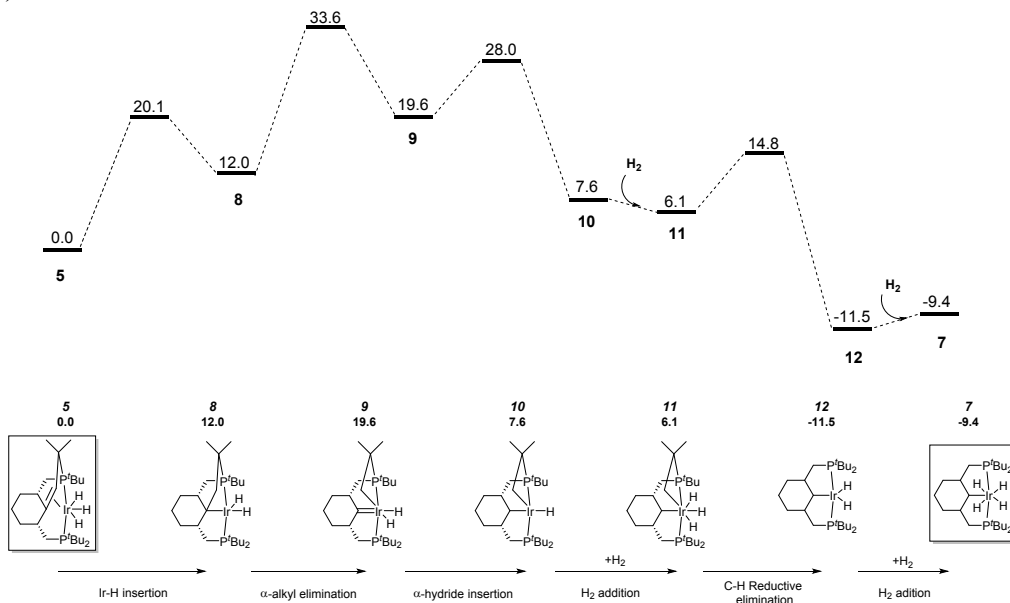

(c) B3LYP-D3

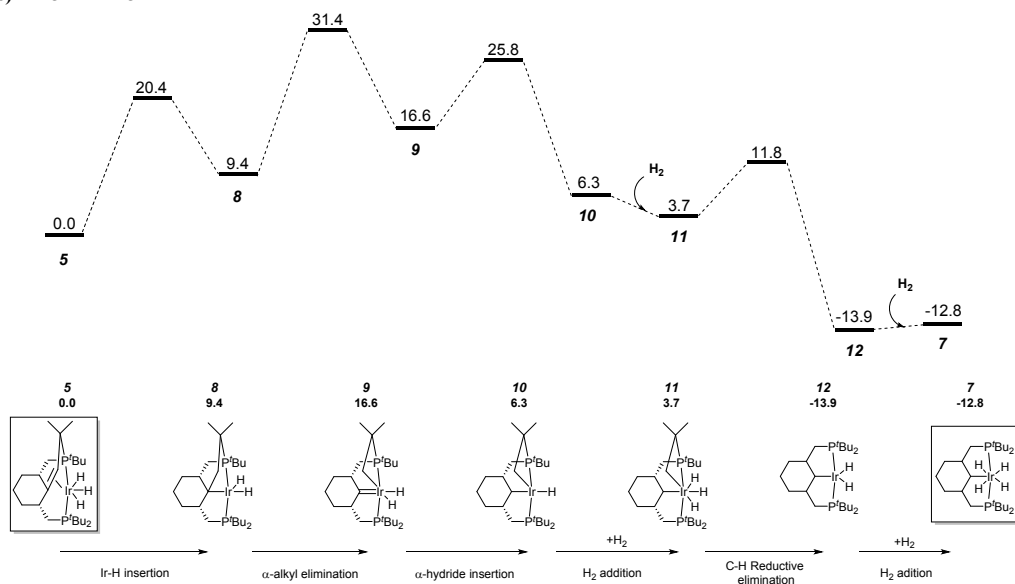

**Figure S4.** Profiles of the calculated relative  $G$  (kcal/mol) for the formation of complex **7** from complex **5** at 140 °C: (a) M06 functional, (b) M06-L, (c) B3LYP-D3.

(a) M06

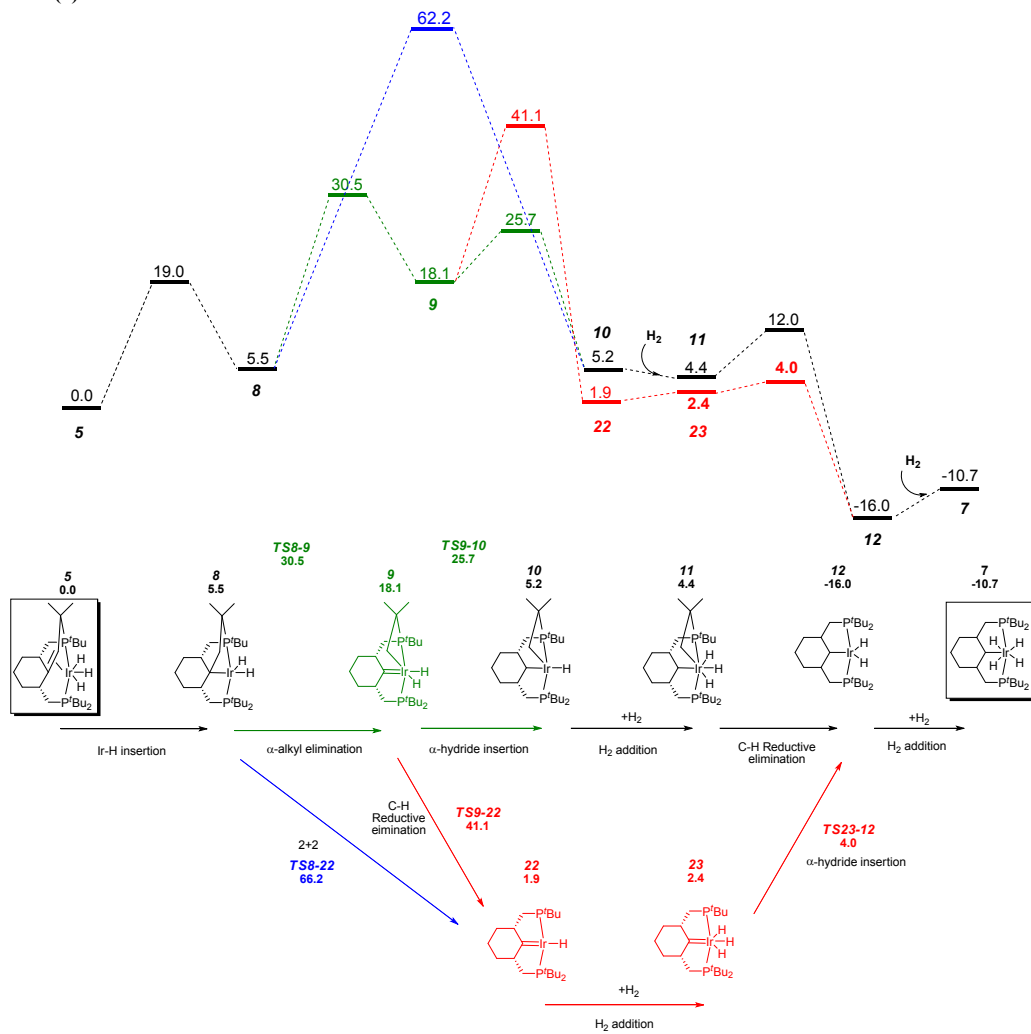

(b) M06-L

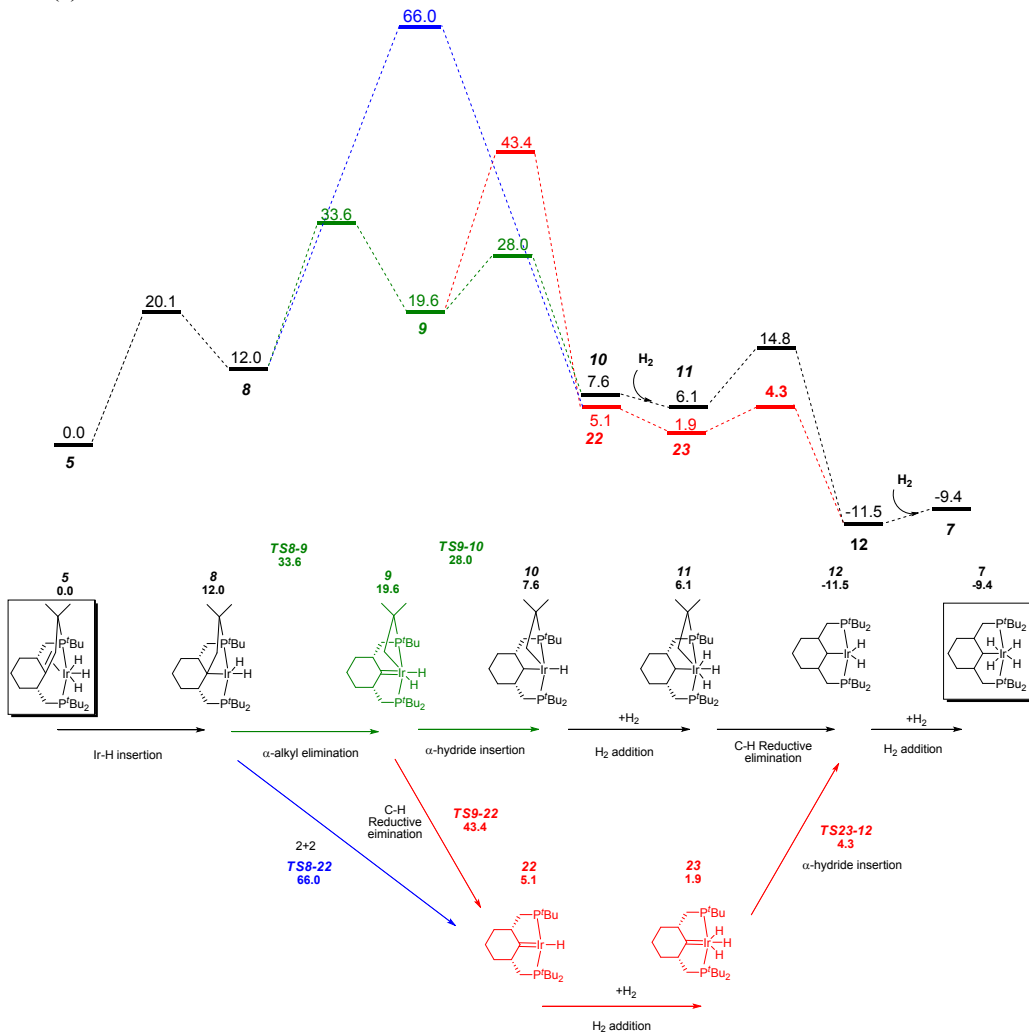

(c) B3LYP-D3

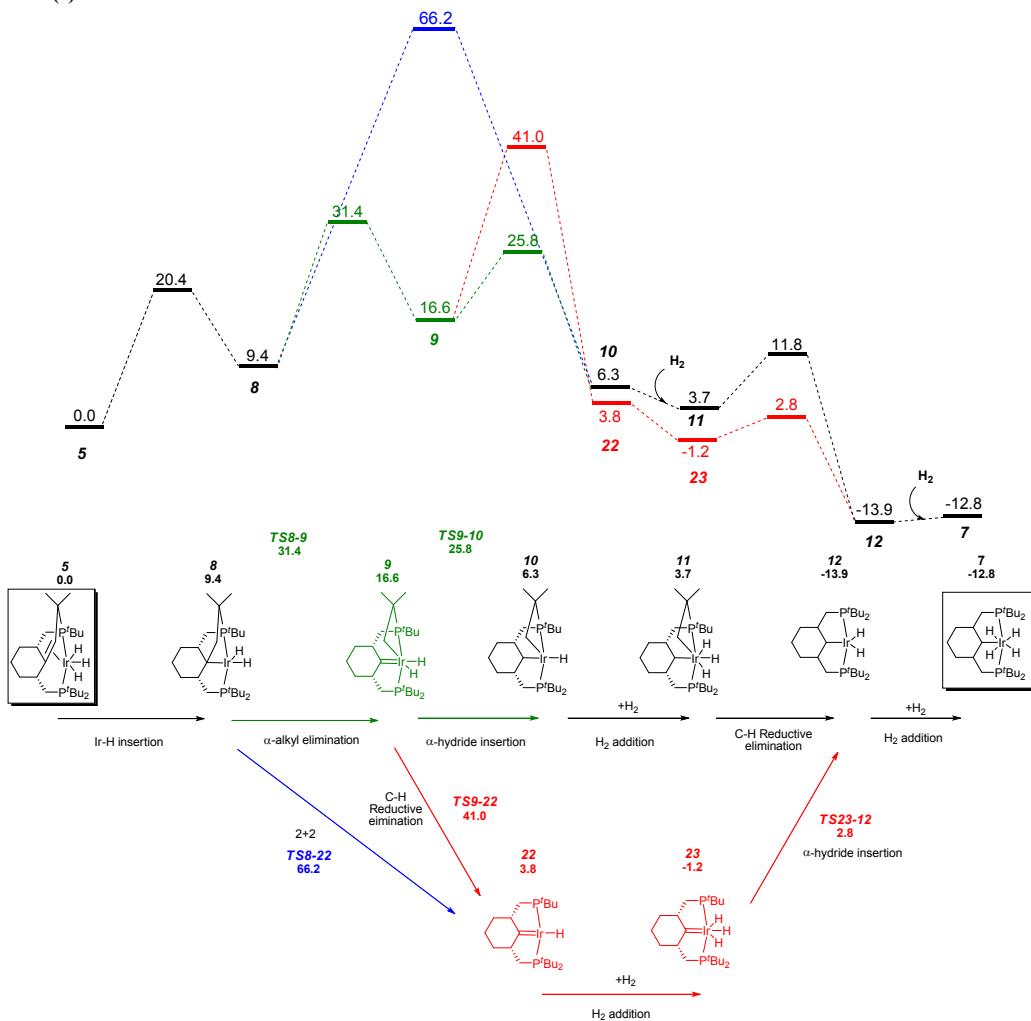

**Figure S5.** Proposed pathways for the formation of complex **7** from complex **5** through carbene **22**; The relative Gibbs free energies are given in kcal/mol at 140 °C : (a) M06 functional, (b) M06-L, (c) B3LYP-D3.

(a) M06

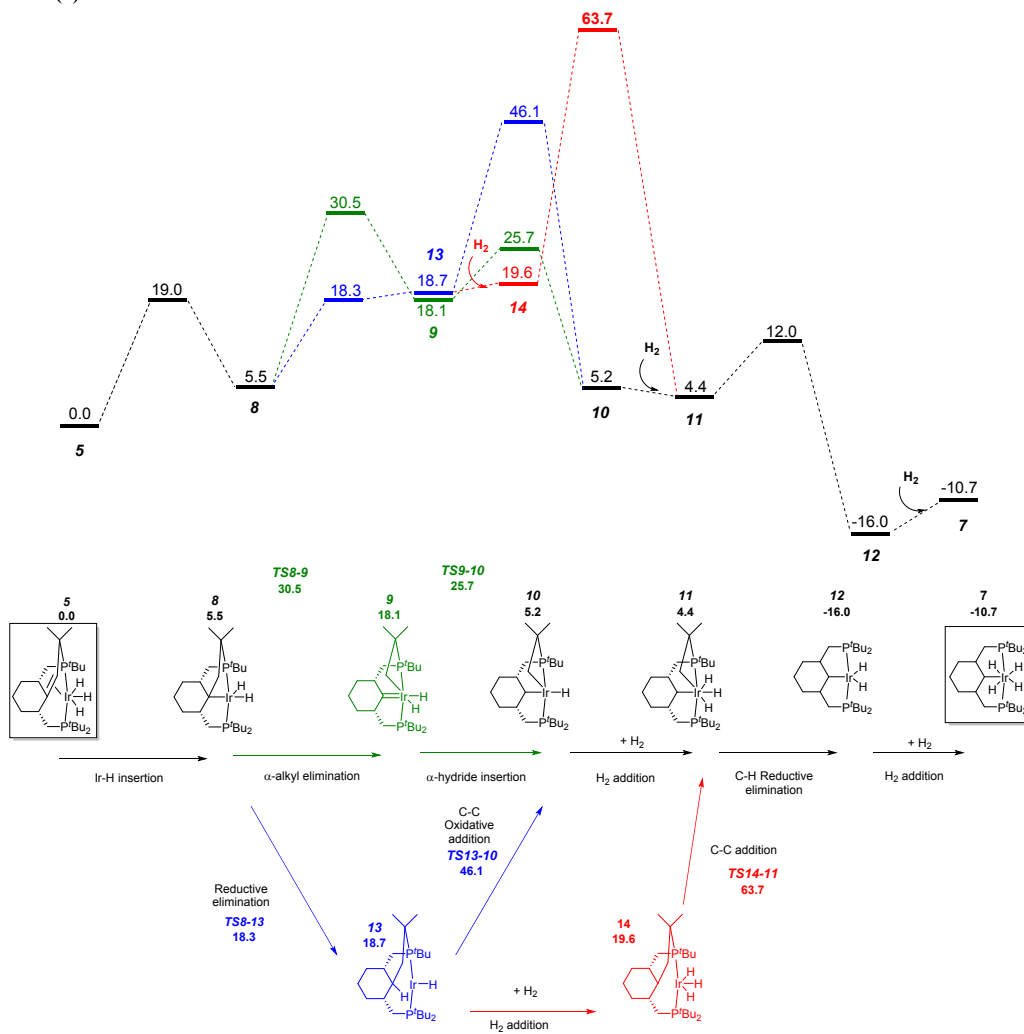

(b) M06-L

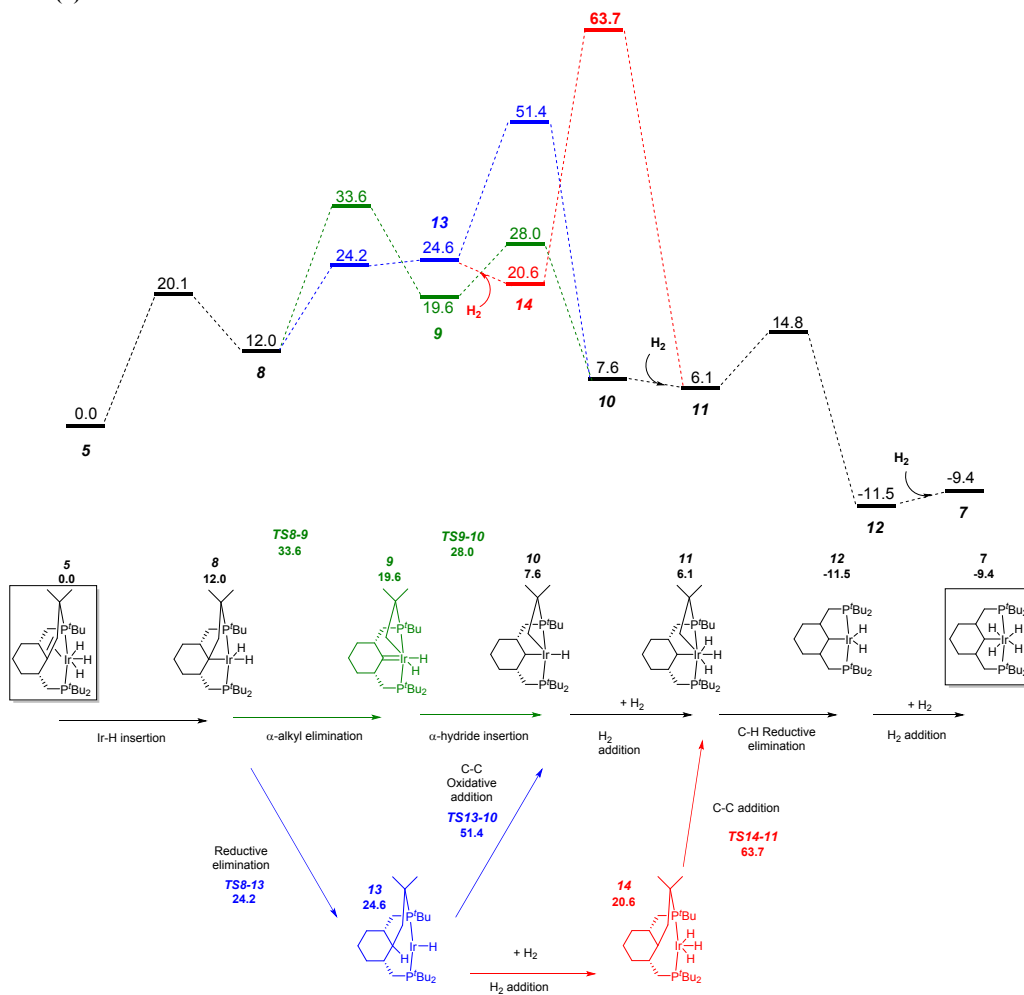

(c) B3LYP-D3

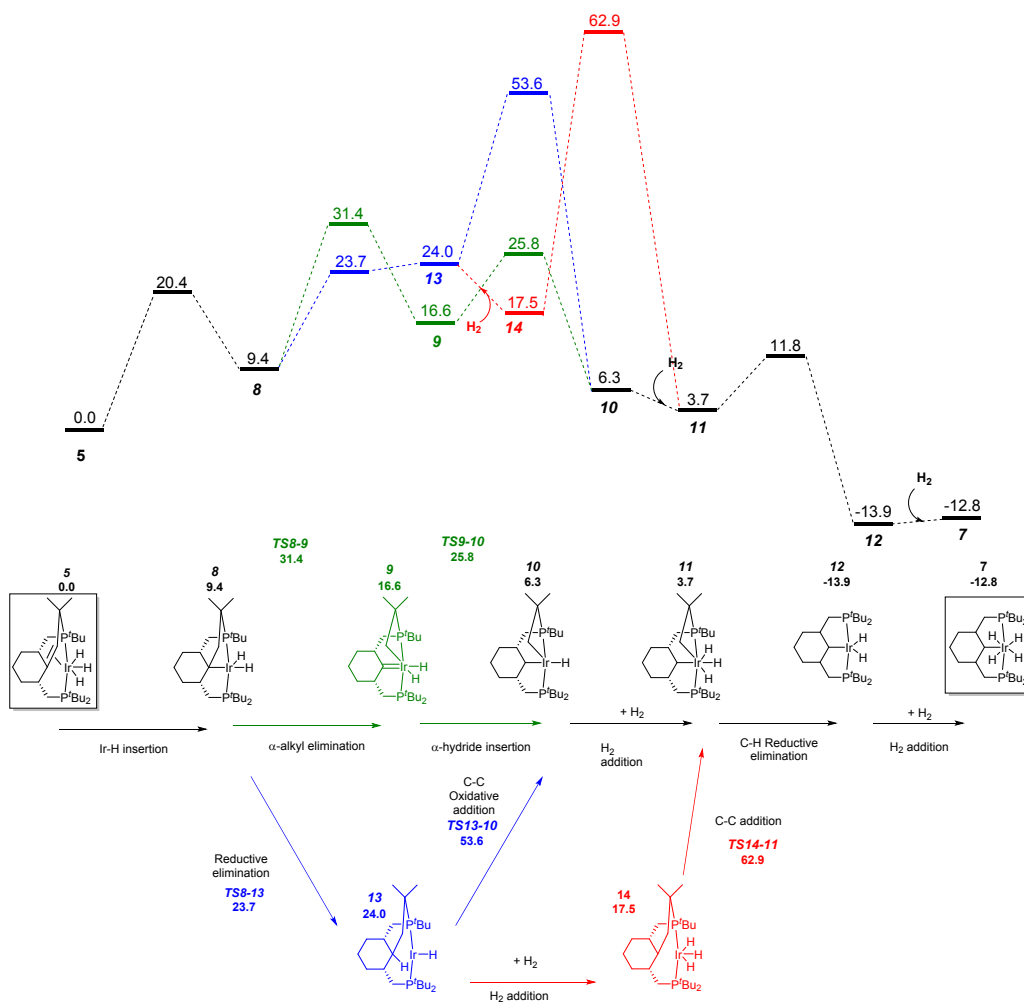

**Figure S6.** Proposed pathways for the formation of complex 7 from complex 5 through complex 13 at 140 °C. The relative Gibbs free energies are given in kcal/mol. : (a) M06 functional, (b) M06-L, (c) B3LYP-D3.



(a) M06

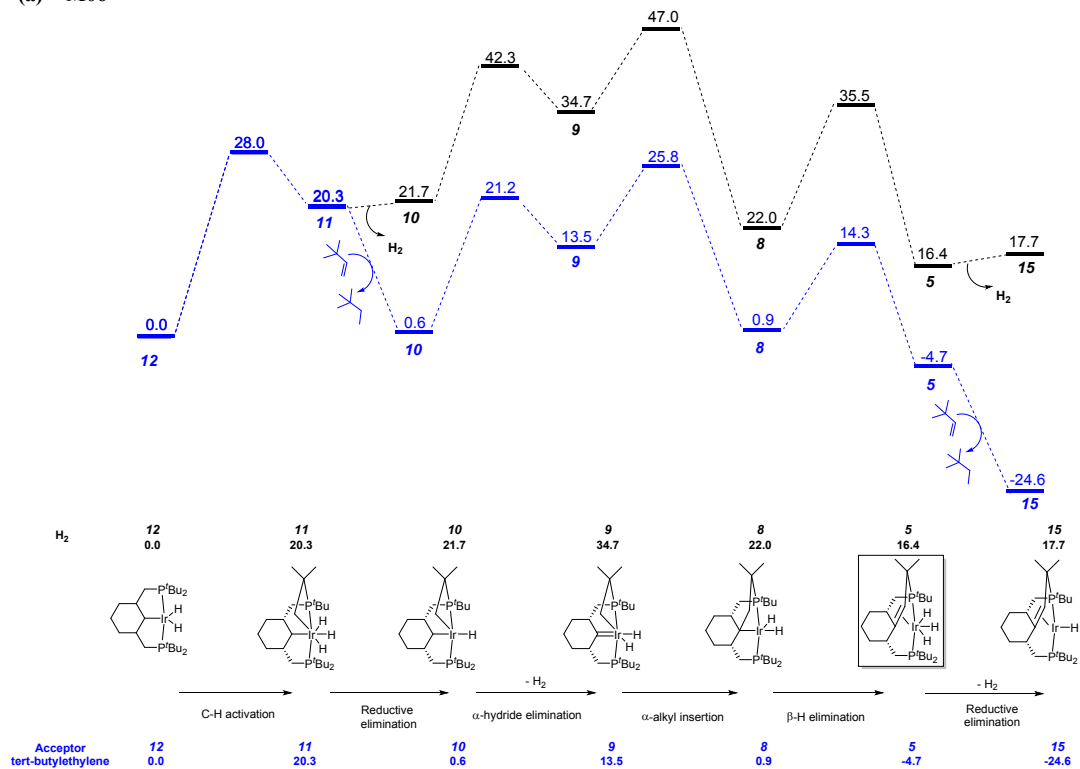

(b) M06-L

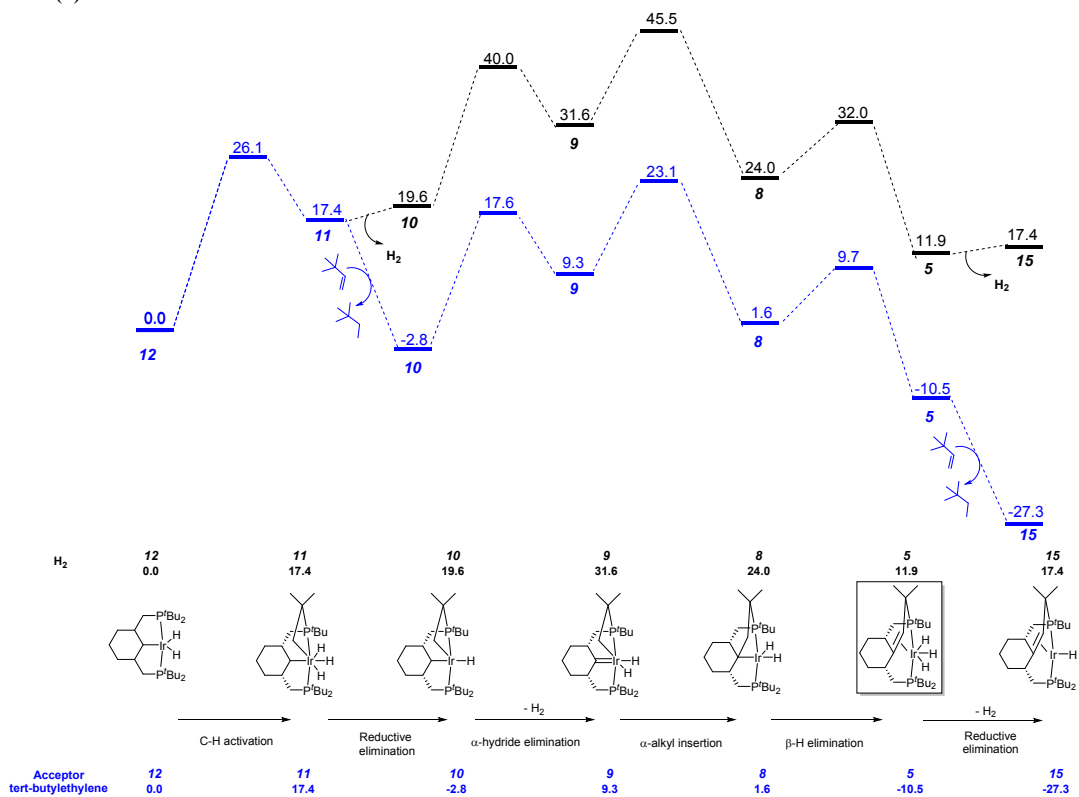

(c) B3LYP-D3

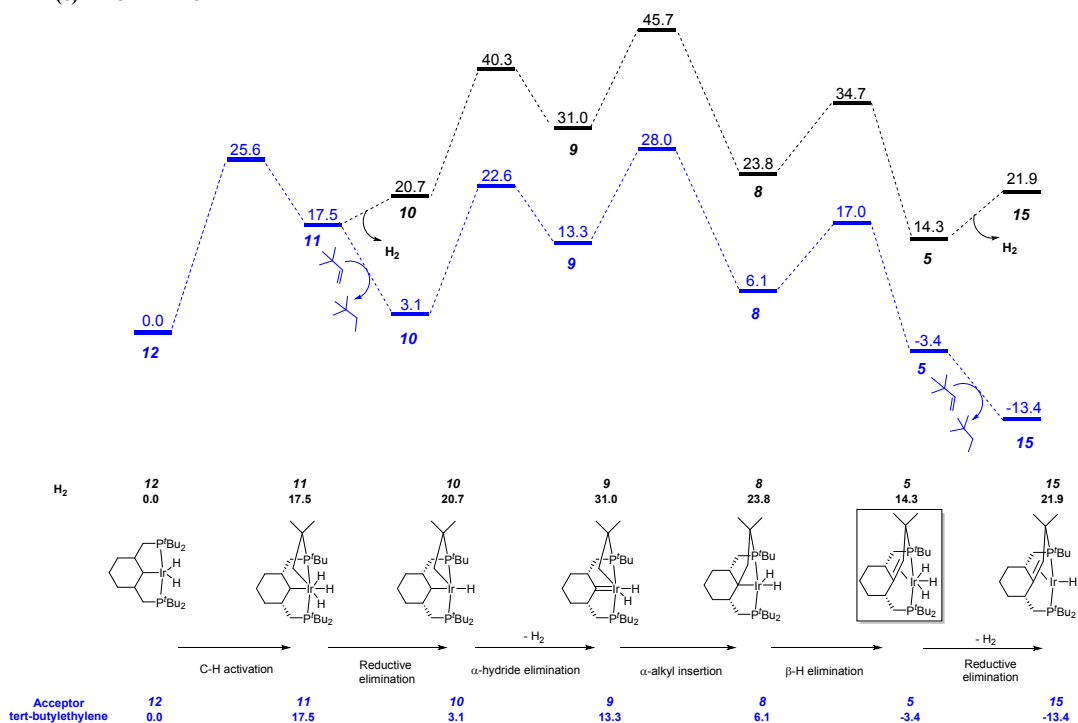

**Figure S7.** Profile of the calculated relative  $G$  (kcal/mol) for the forward reaction from complex **12** at 120 °C: (a) M06 functional, (b) M06-L, (c) B3LYP-D3.

**Reductive elimination of benzene from complex 2.** DFT calculations on the reaction of complex **2** with dihydrogen confirmed the experimental data (Figure 8-9). The formation of complex **12** occurs, through reductive elimination of benzene from complex **2** (detailed calculations were done to both isomers: *syn* and *anti* isomers) forming the Ir(I) complex **24**. ( $TS2-24$  *syn* : 15.1 kcal/mol) and ( $TS2-24$  *anti* : 16.3 kcal/mol). After this,  $H_2$ - addition leads to the experimentally observed intermediate **12**.

It can clearly be concluded, similarly to the statement above, that the DFT calculations agree very well with the experimental data. ( $AG$  experimental : 14.0 kcal/mol) vs ( $AG$  calculated by DFT: *anti*: 16.3 kcal/mol and *syn* : 15.1 kcal/mol).

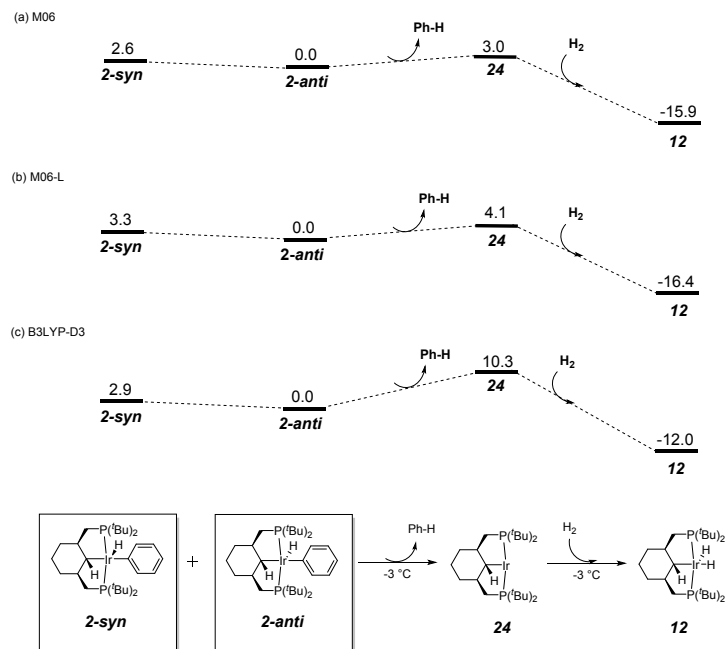

**Figure S8.** Profile of the calculated relative  $G$  (kcal/mol) at  $-3$  °C for the benzene reduction of **2-syn** and **2-anti**. (a) M06 functional, (b) M06-L, (c) B3LYP-D3.

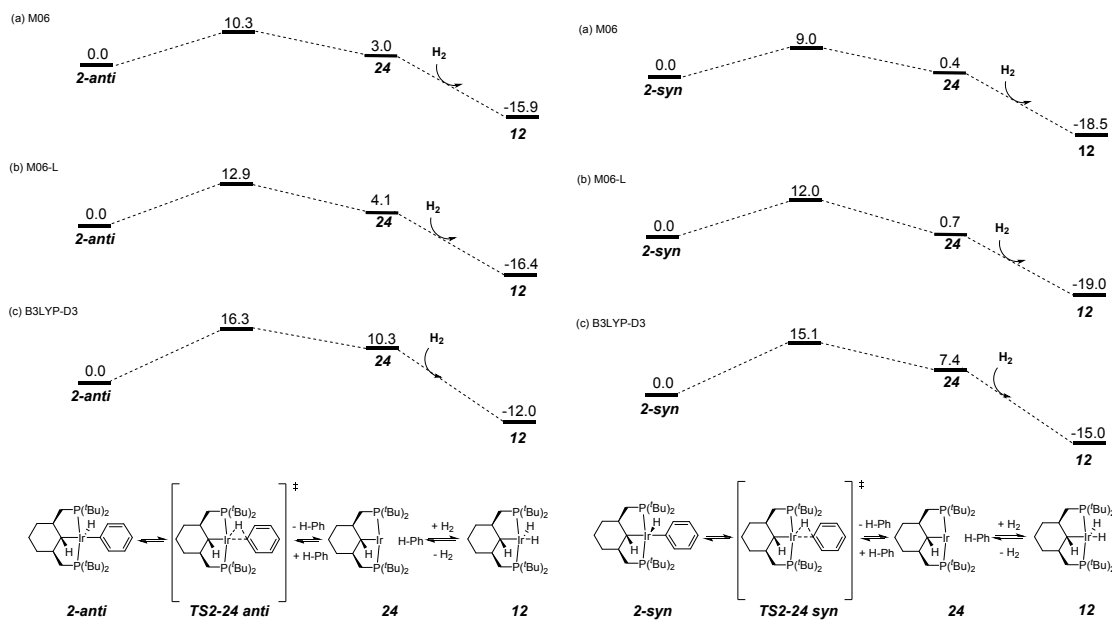

**Figure S9.** Profiles of the calculated relative  $G$  (kcal/mol) at  $-3$  °C for the benzene reduction of **2-syn** and **2-anti**. (a) M06 functional, (b) M06-L, (c) B3LYP-D3.

**NBO studies of carbenes:** With the aim of evaluating the nature of the iridium carbene complexes, NBO calculations<sup>13</sup> were made. The results are given in Table S1. The NBO analysis data exhibit typical scheme for the Fischer complexes; **16** and **22** have a Ir-C<sub>carbene</sub>  $\sigma$  and  $\pi$  bond, while **9** has only  $\sigma$  bond. The Ir-C<sub>carbene</sub>  $\sigma$  bond of complexes **16** and **22** are clearly polarized towards the carbon end (only 40% and 42%, respectively, are at the iridium end) while the  $\pi$  bond is polarized towards the metal moiety (65% and 64%). The NBO bonding pattern suggest that the Ir-C  $\pi$  bond is even more polarized towards the metal moiety because the optimal Lewis structure has a iridium lone-pair  $d(\pi)$  orbital rather than a  $\pi$  bond. The calculated hybridization shows that the  $\sigma$  bond has mainly d character at the iridium end (65%d and 63%d), while the  $\pi$  bond at iridium is purely  $d(\text{Ir})$  (97% and 94%). Note that the  $\sigma$  and  $\pi$  electrons in Schrock complexes are more polarized towards the carbon end. In the case of the carbene **9**, the calculated polarization of the Ir-C<sub>carbene</sub>  $\sigma$  bonds are more equally distributed (57%). The NBO results for the complexes show that the formal charge are between -0.04 and +0.06. This is gratifying, because typically the metal of the Schrock complexes is more positively charged and has a lower 5d population than the Fischer complexes.<sup>14</sup>

As a summary, all the complexes showed very different NBO results from Schrock complexes, and several similarities with Fischer complexes.

**Table S1.** Results of the NBO of the iridium carbene complexes **16**, **22**, **9** using B3LYP/LACVP\*\*

| Carbene   | Atom |      |      |      | Occupational |         | Ir-C bond |       |       |       | Natural Charge |          |         |         |
|-----------|------|------|------|------|--------------|---------|-----------|-------|-------|-------|----------------|----------|---------|---------|
|           | 6s   | 5d   | 6d   | 7p   |              |         | % Ir      | % s   | % p   | % d   | Ir             | Cl       | Pincer  | Cl/H    |
| <b>16</b> | 0.67 | 8.37 | 0.02 | 0.01 | $\sigma$     | 1.91168 | 39.80     | 35.37 | 0.03  | 64.60 | -0.0465        | -0.00591 | +0.6372 | -0.5907 |
|           |      |      |      |      | $\pi$        | 1.93786 | 65.20     | 2.65  | 0.16  | 97.19 |                |          |         |         |
| <b>22</b> | 0.69 | 8.45 | 0.01 | 0.02 | $\sigma$     | 1.88195 | 42.12     | 37.11 | 0.00  | 62.80 | -0.1522        | -0.0479  | +0.4569 | -0.3047 |
|           |      |      |      |      | $\pi$        | 1.92180 | 64.25     | 5.29  | 0.21  | 94.50 |                |          |         |         |
| <b>9</b>  | 0.57 | 8.35 | 0.02 | 0.01 | $\sigma$     | 1.48548 | 57.09     | 2.40  | 30.87 | 66.73 | +0.0600        | -0.14317 | -0.16   | -0.1000 |

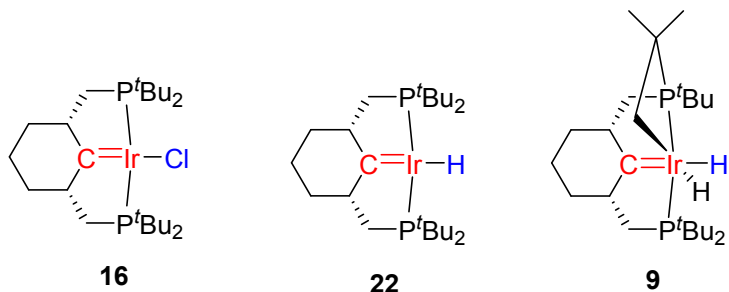

## Calculated energies for all the species in this study

**Table S2.** The calculated energies at B3LYP level with LAVCP\*\* basis set and the single-point energies at M06, M06-L or B3LYP level with LAVC3P\*\*\*++ basis set, respectively at 298K.

| Molecules /complexes      | Energy B3LYP LAVCP** [hartree] | Energy M06 LAVC3P***++ [hartree] | Energy M06-L LAVC3P***++ [hartree] | Energy B3LYP-D3 LAVC3P***++ [hartree] | Zero-pt E [kcal/mol] | Enthalpy [kcal/mol] | Entropy [cal/mol K] | Solvation E [kcal/mol] |
|---------------------------|--------------------------------|----------------------------------|------------------------------------|---------------------------------------|----------------------|---------------------|---------------------|------------------------|
| <b>H<sub>2</sub></b>      | -1.178539                      | -1.17026                         | -1.171479                          | -1.171479                             | 6.384                | 2.074               | 31.132              | 0.000                  |
| <b>tert-butylethylene</b> | -235.860939                    | -235.712436                      | -235.873665                        | -235.93135                            | 103.482              | 5.405               | 82.508              | -0.699                 |
| <b>tert-butylethane</b>   | -237.09896                     | -236.945831                      | -237.110185                        | -237.168529                           | 118.244              | 5.742               | 84.931              | -0.228                 |
| <b>5</b>                  | -1731.570932                   | -1730.990513                     | -1731.701294                       | -1731.96998                           | 429.004              | 21.602              | 195.83              | -2.49                  |
| <b>TS5-8</b>              | -1731.534962                   | -1730.957358                     | -1731.666337                       | -1731.934605                          | 427.881              | 21.561              | 196.449             | -2.88                  |
| <b>8</b>                  | -1731.560583                   | -1730.982919                     | -1731.683353                       | -1731.956145                          | 429.959              | 22.026              | 199.858             | -1.44                  |
| <b>6</b>                  | -1732.759981                   | -1732.174648                     | -1732.883648                       | -1733.16455                           | 441.799              | 21.862              | 197.004             | -1.626                 |
| <b>TS8-9</b>              | -1731.523772                   | -1730.943028                     | -1731.648877                       | -1731.921074                          | 428.996              | 21.664              | 196.747             | -1.472                 |
| <b>9</b>                  | -1731.544441                   | -1730.958649                     | -1731.666998                       | -1731.940567                          | 428.658              | 22.143              | 202.26              | -1.894                 |
| <b>TS9-10</b>             | -1731.52687                    | -1730.944821                     | -1731.652076                       | -1731.92418                           | 427.12               | 22.075              | 202.415             | -1.274                 |
| <b>10</b>                 | -1731.56741                    | -1730.982598                     | -1731.68956                        | -1731.960219                          | 430.381              | 22.076              | 200.763             | -2.081                 |
| <b>11</b>                 | -1732.768286                   | -1732.18266                      | -1732.891975                       | -1733.17253                           | 442.495              | 22.15               | 199.32              | -1.407                 |
| <b>TS11-12</b>            | -1732.753398                   | -1732.16617                      | -1732.873798                       | -1733.155324                          | 441.295              | 22.202              | 202.459             | -1.721                 |
| <b>12</b>                 | -1732.800722                   | -1732.211781                     | -1732.916501                       | -1733.19715                           | 442.902              | 22.971              | 207.492             | -1.422                 |
| <b>7</b>                  | -1733.996059                   | -1733.399765                     | -1734.110979                       | -1734.401325                          | 455.252              | 22.878              | 207.959             | -1.477                 |
| <b>TS8-22</b>             | -1731.461798                   | -1730.885207                     | -1731.589863                       | -1731.858216                          | 427.563              | 22.153              | 202.274             | -2.832                 |
| <b>TS9-22</b>             | -1731.504849                   | -1730.919703                     | -1731.626778                       | -1731.899387                          | 427.391              | 22.16               | 204.714             | -1.083                 |
| <b>22</b>                 | -1731.56987                    | -1730.98283                      | -1731.688508                       | -1731.959252                          | 429.747              | 22.815              | 208.526             | -2.06                  |
| <b>23</b>                 | -1732.775011                   | -1732.179824                     | -1732.892662                       | -1733.174388                          | 441.269              | 22.813              | 206.281             | -1.721                 |
| <b>TS23-12</b>            | -1732.765771                   | -1732.175854                     | -1732.887392                       | -1733.166547                          | 440.307              | 22.561              | 204.709             | -2.043                 |
| <b>TS8-13</b>             | -1731.536566                   | -1730.961347                     | -1731.662704                       | -1731.932235                          | 429.822              | 21.66               | 197.701             | -2.613                 |
| <b>13</b>                 | -1731.539943                   | -1730.963086                     | -1731.664507                       | -1731.934064                          | 432.065              | 21.95               | 200.302             | -2.559                 |
| <b>TS13-10</b>            | -1731.491511                   | -1730.91784                      | -1731.620176                       | -1731.885375                          | 430.187              | 21.912              | 199.651             | -1.908                 |
| <b>14</b>                 | -1732.747008                   | -1732.15687                      | -1732.867267                       | -1733.148915                          | 443.138              | 22.048              | 198.991             | -3.111                 |
| <b>TS14-11</b>            | -1732.673424                   | -1732.08505                      | -1732.796933                       | -1733.075015                          | 441.894              | 21.943              | 198.536             | -2.942                 |
| <b>15</b>                 | -1730.363211                   | -1729.792836                     | -1730.495626                       | -1730.752842                          | 417.617              | 21.616              | 197.585             | -2.544                 |
| <b>Benzene</b>            | -232.253147                    | -232.113806                      | -232.271501                        | -232.316161                           | 63.142               | 3.345               | 69.018              | -1.175                 |
| <b>2-anti</b>             | -1963.840796                   | -1963.130135                     | -1963.990466                       | -1964.314608                          | 494.979              | 26.095              | 229.656             | -2.054                 |
| <b>TS2-24 anti</b>        | -1963.817256                   | -1963.114376                     | -1963.970572                       | -1964.28932                           | 494.702              | 25.79               | 227.948             | -1.537                 |
| <b>2 syn</b>              | -1963.835815                   | -1963.125172                     | -1963.984383                       | -1964.309175                          | 495.293              | 26.114              | 232.496             | -2.085                 |
| <b>TS2-24 syn</b>         | -1963.813798                   | -1963.111213                     | -1963.965537                       | -1964.285431                          | 494.667              | 25.898              | 230.488             | -1.56                  |
| <b>24</b>                 | -1731.580919                   | -1730.996436                     | -1731.697381                       | -1731.966898                          | 432.889              | 22.477              | 205.603             | -0.892                 |

**Table S3.** The calculated energies at B3LYP level with LAVCP\*\* basis set and the single-point energies at M06 , M06-L or B3LYP level with LAVC3P\*\*\*++ basis set, respectively at 270K.

| Molecules /complexes | Energy B3LYP LAVCP** [hartree] | Energy M06 LAVC3P***++ [hartree] | Energy M06-L LAVC3P***++ [hartree] | Energy B3LYP-D3 LAVC3P***++ [hartree] | Zero-pt E [kcal/mol] | Enthalpy [kcal/mol] | Entropy [cal/mol K] | Solvation E [kcal/mol] |
|----------------------|--------------------------------|----------------------------------|------------------------------------|---------------------------------------|----------------------|---------------------|---------------------|------------------------|
| <b>Benzene</b>       | -232.253147                    | -232.113806                      | -232.271501                        | -232.316161                           | 63.142               | 2.836               | 67.225              | -1.175                 |
| <b>2 anti</b>        | -1963.840796                   | -1963.130135                     | -1963.990466                       | -1964.314608                          | 494.979              | 22.126              | 215.756             | -2.054                 |
| <b>TS2-24 anti</b>   | -1963.817256                   | -1963.114376                     | -1963.970572                       | -1964.28932                           | 494.702              | 21.416              | 212.552             | -1.537                 |
| <b>2 syn</b>         | -1963.835815                   | -1963.125172                     | -1963.984383                       | -1964.309175                          | 495.293              | 21.704              | 216.968             | -2.085                 |
| <b>TS2-24 syn</b>    | -1963.813798                   | -1963.111213                     | -1963.965537                       | -1964.285431                          | 494.667              | 21.521              | 215.081             | -1.56                  |
| <b>24</b>            | -1731.580919                   | -1730.996436                     | -1731.697381                       | -1731.966898                          | 432.889              | 18.694              | 192.285             | -0.892                 |
| <b>12</b>            | -1732.800722                   | -1732.211781                     | -1732.916501                       | -1733.19715                           | 442.902              | 19.078              | 193.784             | -1.422                 |

**Table S4.** The calculated energies at B3LYP level with LAVCP\*\* basis set and the single-point energies at M06, M06-L or B3LYP level with LAVC3P\*\*\*++ basis set, respectively at 393K.

| Molecules /complexes      | Energy B3LYP LAVCP** [hartree] | Energy M06 LAVC3P***++ [hartree] | Energy M06-L LAVC3P***++ [hartree] | Energy B3LYP-D3 LAVC3P***++ [hartree] | Zero-pt E [kcal/mol] | Enthalpy [kcal/mol] | Entropy [cal/mol K] | Solvation E [kcal/mol] |
|---------------------------|--------------------------------|----------------------------------|------------------------------------|---------------------------------------|----------------------|---------------------|---------------------|------------------------|
| <b>H<sub>2</sub></b>      | -1.178539                      | -1.17026                         | -1.171479                          | -1.171479                             | 6.384                | 2.733               | 33.053              | 0.000                  |
| <b>tert-butylethylene</b> | -235.860939                    | -235.712436                      | -235.873665                        | -235.93135                            | 103.482              | 8.723               | 92.119              | -0.699                 |
| <b>tert-butylethane</b>   | -237.09896                     | -236.945831                      | -237.110185                        | -237.168529                           | 118.244              | 9.27                | 95.149              | -0.228                 |
| <b>5</b>                  | -1731.570932                   | -1730.990513                     | -1731.701294                       | -1731.96998                           | 429.004              | 36.639              | 239.375             | -2.49                  |
| <b>TS5-8</b>              | -1731.534962                   | -1730.957358                     | -1731.666337                       | -1731.934605                          | 427.881              | 36.473              | 239.63              | -2.88                  |
| <b>8</b>                  | -1731.560583                   | -1730.982919                     | -1731.683353                       | -1731.956145                          | 429.959              | 37.109              | 243.54              | -1.44                  |
| <b>6</b>                  | -1732.759981                   | -1732.174648                     | -1732.883648                       | -1733.16455                           | 441.799              | 37.196              | 241.407             | -1.626                 |
| <b>TS8-9</b>              | -1731.523772                   | -1730.943028                     | -1731.648877                       | -1731.921074                          | 428.996              | 36.63               | 240.087             | -1.472                 |
| <b>9</b>                  | -1731.544441                   | -1730.958649                     | -1731.666998                       | -1731.940567                          | 428.658              | 37.281              | 246.101             | -1.894                 |
| <b>TS9-10</b>             | -1731.52687                    | -1730.944821                     | -1731.652076                       | -1731.92418                           | 427.12               | 37.12               | 245.985             | -1.274                 |
| <b>10</b>                 | -1731.56741                    | -1730.982598                     | -1731.68956                        | -1731.960219                          | 430.381              | 37.138              | 244.384             | -2.081                 |
| <b>11</b>                 | -1732.768286                   | -1732.18266                      | -1732.891975                       | -1733.17253                           | 442.495              | 37.544              | 243.9               | -1.407                 |
| <b>TS11-12</b>            | -1732.753398                   | -1732.16617                      | -1732.873798                       | -1733.155324                          | 441.295              | 37.485              | 246.715             | -1.721                 |
| <b>12</b>                 | -1732.800722                   | -1732.211781                     | -1732.916501                       | -1733.19715                           | 442.902              | 38.477              | 252.404             | -1.422                 |
| <b>7</b>                  | -1733.996059                   | -1733.399765                     | -1734.110979                       | -1734.401325                          | 455.252              | 38.602              | 253.494             | -1.477                 |
| <b>TS8-22</b>             | -1731.461798                   | -1730.885207                     | -1731.589863                       | -1731.858216                          | 427.563              | 37.232              | 245.945             | -2.832                 |
| <b>TS9-22</b>             | -1731.504849                   | -1730.919703                     | -1731.626778                       | -1731.899387                          | 427.391              | 37.218              | 248.323             | -1.083                 |
| <b>22</b>                 | -1731.56987                    | -1730.98283                      | -1731.688508                       | -1731.959252                          | 429.747              | 38.025              | 252.582             | -2.06                  |
| <b>23</b>                 | -1732.775011                   | -1732.179824                     | -1732.892662                       | -1733.174388                          | 441.269              | 38.325              | 251.209             | -1.721                 |
| <b>TS23-12</b>            | -1732.765771                   | -1732.175854                     | -1732.887392                       | -1733.166547                          | 440.307              | 37.937              | 249.24              | -2.043                 |
| <b>TS8-13</b>             | -1731.536566                   | -1730.961347                     | -1731.662704                       | -1731.932235                          | 429.822              | 36.548              | 240.816             | -2.613                 |
| <b>13</b>                 | -1731.539943                   | -1730.963086                     | -1731.664507                       | -1731.934064                          | 432.065              | 36.899              | 243.597             | -2.559                 |
| <b>TS13-10</b>            | -1731.491511                   | -1730.91784                      | -1731.620176                       | -1731.885375                          | 430.187              | 36.862              | 242.948             | -1.908                 |
| <b>14</b>                 | -1732.747008                   | -1732.15687                      | -1732.867267                       | -1733.148915                          | 443.138              | 37.348              | 243.297             | -3.111                 |
| <b>TS14-11</b>            | -1732.673424                   | -1732.08505                      | -1732.796933                       | -1733.075015                          | 441.894              | 37.186              | 242.674             | -2.942                 |
| <b>15</b>                 | -1730.363211                   | -1729.792836                     | -1730.495626                       | -1730.752842                          | 417.617              | 36.361              | 240.289             | -2.544                 |

**Table S5.** The calculated energies at B3LYP level with LAVCP\*\* basis set and the single-point energies at M06, M06-L or B3LYP level with LAVC3P\*\*\*++ basis set, respectively at 413K.

| Molecules /complexes | Energy B3LYP LAVCP** [hartree] | Energy M06 LAVC3P***++ [hartree] | Energy M06-L LAVC3P***++ [hartree] | Energy B3LYP-D3 LAVC3P***++ [hartree] | Zero-pt E [kcal/mol] | Enthalpy [kcal/mol] | Entropy [cal/mol K] | Solvation E [kcal/mol] |
|----------------------|--------------------------------|----------------------------------|------------------------------------|---------------------------------------|----------------------|---------------------|---------------------|------------------------|
| <b>H<sub>2</sub></b> | -1.178539                      | -1.17026                         | -1.171479                          | -1.171479                             | 6.384                | 2.873               | 33.399              | 0.000                  |
| <b>5</b>             | -1731.570932                   | -1730.990513                     | -1731.701294                       | -1731.96998                           | 429.004              | 40.266              | 248.375             | -2.49                  |
| <b>TS5-8</b>         | -1731.534962                   | -1730.957358                     | -1731.666337                       | -1731.934605                          | 427.881              | 40.07               | 248.556             | -2.88                  |
| <b>8</b>             | -1731.560583                   | -1730.982919                     | -1731.683353                       | -1731.956145                          | 429.959              | 40.739              | 252.548             | -1.44                  |
| <b>6</b>             | -1732.759981                   | -1732.174648                     | -1732.883648                       | -1733.16455                           | 441.799              | 40.899              | 250.594             | -1.626                 |
| <b>TS8-9</b>         | -1731.523772                   | -1730.943028                     | -1731.648877                       | -1731.921074                          | 428.996              | 40.237              | 249.036             | -1.472                 |
| <b>9</b>             | -1731.544441                   | -1730.958649                     | -1731.666998                       | -1731.940567                          | 428.658              | 40.926              | 255.145             | -1.894                 |
| <b>TS9-10</b>        | -1731.52687                    | -1730.944821                     | -1731.652076                       | -1731.92418                           | 427.12               | 40.742              | 254.974             | -1.274                 |
| <b>10</b>            | -1731.56741                    | -1730.982598                     | -1731.68956                        | -1731.960219                          | 430.381              | 40.764              | 253.382             | -2.081                 |
| <b>11</b>            | -1732.768286                   | -1732.18266                      | -1732.891975                       | -1733.17253                           | 442.495              | 41.255              | 253.11              | -1.407                 |
| <b>TS11-12</b>       | -1732.753398                   | -1732.16617                      | -1732.873798                       | -1733.155324                          | 441.295              | 41.17               | 255.859             | -1.721                 |
| <b>12</b>            | -1732.800722                   | -1732.211781                     | -1732.916501                       | -1733.19715                           | 442.902              | 42.201              | 261.645             | -1.422                 |
| <b>7</b>             | -1733.996059                   | -1733.399765                     | -1734.110979                       | -1734.401325                          | 455.252              | 42.392              | 262.899             | -1.477                 |
| <b>TS8-22</b>        | -1731.461798                   | -1730.885207                     | -1731.589863                       | -1731.858216                          | 427.563              | 40.859              | 254.944             | -2.832                 |
| <b>TS9-22</b>        | -1731.504849                   | -1730.919703                     | -1731.626778                       | -1731.899387                          | 427.391              | 40.841              | 257.315             | -1.083                 |
| <b>22</b>            | -1731.56987                    | -1730.98283                      | -1731.688508                       | -1731.959252                          | 429.747              | 41.674              | 261.636             | -2.06                  |
| <b>23</b>            | -1732.775011                   | -1732.179824                     | -1732.892662                       | -1733.174388                          | 441.269              | 42.056              | 260.466             | -1.721                 |
| <b>TS23-12</b>       | -1732.765771                   | -1732.175854                     | -1732.887392                       | -1733.166547                          | 440.307              | 41.637              | 258.422             | -2.043                 |
| <b>TS8-13</b>        | -1731.536566                   | -1730.961347                     | -1731.662704                       | -1731.932235                          | 429.822              | 40.137              | 249.72              | -2.613                 |
| <b>13</b>            | -1731.539943                   | -1730.963086                     | -1731.664507                       | -1731.934064                          | 432.065              | 40.499              | 252.53              | -2.559                 |
| <b>TS13-10</b>       | -1731.491511                   | -1730.91784                      | -1731.620176                       | -1731.885375                          | 430.187              | 40.46               | 251.876             | -1.908                 |
| <b>14</b>            | -1732.747008                   | -1732.15687                      | -1732.867267                       | -1733.148915                          | 443.138              | 41.039              | 252.456             | -3.111                 |
| <b>TS14-11</b>       | -1732.673424                   | -1732.08505                      | -1732.796933                       | -1733.075015                          | 441.894              | 40.865              | 251.803             | -2.942                 |
| <b>15</b>            | -1730.363211                   | -1729.792836                     | -1730.495626                       | -1730.752842                          | 417.617              | 39.908              | 249.091             | -2.544                 |

## Cartesian coordinates for all the species calculated at the B3LYP level in this study

|                                  |               |               |               |
|----------------------------------|---------------|---------------|---------------|
| <b>H<sub>2</sub></b>             |               |               |               |
| H1                               | 0.0000000000  | 0.0000000000  | 0.3713943308  |
| H2                               | 0.0000000000  | 0.0000000000  | -0.3713943308 |
| <b><i>tert</i>-butylethylene</b> |               |               |               |
| C1                               | 0.7651332043  | 1.4629448585  | 2.0755962239  |
| C5                               | 2.1720337213  | -0.6276716487 | 2.5465373976  |
| C6                               | 1.8737161275  | 0.6588328547  | 2.7312955801  |
| H7                               | 2.9958532568  | -1.0938586052 | 3.0793806169  |
| H8                               | 2.4811506399  | 1.2336984855  | 3.4337273358  |
| H9                               | 1.6161863896  | -1.2667077283 | 1.8670633433  |
| C9                               | -0.1551669063 | 2.0166033977  | 3.1882470426  |
| H10                              | 0.4100880199  | 2.6210979001  | 3.9065221202  |
| H11                              | -0.9399259677 | 2.6518327877  | 2.7613436302  |
| H12                              | -0.6370699729 | 1.2031764366  | 3.7401934638  |
| C12                              | 1.4082337543  | 2.6487858239  | 1.3197992033  |
| H13                              | 2.0100445438  | 3.2690053963  | 1.9935980291  |
| H14                              | 2.0622926522  | 2.2946138276  | 0.5164009253  |
| H15                              | 0.6374388525  | 3.2890832478  | 0.8754297310  |
| C15                              | -0.0679938108 | 0.6225522603  | 1.0944218345  |
| H16                              | -0.8572566155 | 1.2347114306  | 0.6446452018  |
| H17                              | 0.5507657032  | 0.2267229071  | 0.2824470125  |
| H18                              | -0.5480066504 | -0.2226054603 | 1.5989399605  |
| <b><i>tert</i>-butylethane</b>   |               |               |               |
| C1                               | 0.6637642391  | 1.4119101159  | 2.1641072484  |
| H2                               | 3.0839173806  | -1.0875510878 | 2.9099845115  |
| H3                               | 3.1756859794  | 0.0362835823  | 1.5546185396  |
| C4                               | -0.1358700484 | 2.2936141083  | 3.1440308030  |
| H5                               | 0.5316807531  | 2.9055117029  | 3.7618485735  |
| H6                               | -0.8084165916 | 2.9722554059  | 2.6068570321  |
| H7                               | -0.7472383913 | 1.6825669367  | 3.8182559471  |
| C8                               | 1.4952867036  | 2.3224530231  | 1.2392418046  |
| H9                               | 2.2202670671  | 2.9121923945  | 1.8125208274  |
| H10                              | 2.0486712223  | 1.7475969369  | 0.4896258721  |
| H11                              | 0.8477861987  | 3.0241783299  | 0.7009618534  |
| C12                              | -0.3243733678 | 0.5845025383  | 1.3188777655  |
| H13                              | -1.0202250157 | 1.2403278738  | 0.7830140190  |
| H14                              | 0.1904201093  | -0.0270670927 | 0.5707880810  |
| H15                              | -0.9190998175 | -0.0867154509 | 1.9495838845  |
| C16                              | 1.5865946013  | 0.4837259243  | 2.9989015449  |
| H17                              | 2.2221209591  | 1.1169034980  | 3.6334019014  |
| H18                              | 0.9551937228  | -0.0937441738 | 3.6883361312  |
| C19                              | 2.4814109738  | -0.4879952583 | 2.2192197056  |
| H20                              | 1.8974267830  | -1.1846812233 | 1.6091118995  |
| <b>5</b>                         |               |               |               |
| H1                               | 0.3797773456  | -0.2145413436 | 2.2434129500  |
| Ir2                              | 1.7106691005  | 0.0138979453  | 1.3078018992  |
| P3                               | 1.4573878783  | 2.3378060972  | 1.2610602464  |
| P4                               | 1.7344798985  | -2.1873210583 | 0.5825566212  |
| C5                               | 2.1230422727  | 3.7335390671  | 2.3417822603  |
| C6                               | 1.3460600461  | 3.6813056165  | 3.6744700595  |
| H7                               | 1.4051183101  | 2.6894057820  | 4.1339569555  |
| H8                               | 0.2899746886  | 3.9392575767  | 3.5464809851  |
| H9                               | 1.7801972720  | 4.4049271067  | 4.3752479984  |
| C10                              | 1.9392024386  | 5.1096857074  | 1.6755908948  |
| H11                              | 2.2942325397  | 5.8972699252  | 2.3526534153  |
| H12                              | 0.8891165387  | 5.3220282268  | 1.4489564098  |
| H13                              | 2.5115544005  | 5.1922186895  | 0.7466181062  |
| C14                              | 3.6157193668  | 3.4671335710  | 2.6229891902  |
| H15                              | 4.2232889145  | 3.5334211759  | 1.7164894515  |
| H16                              | 3.7657307331  | 2.4746454031  | 3.0575701878  |
| H17                              | 3.9908029633  | 4.2160564631  | 3.3318113803  |
| C18                              | 1.9451863546  | 2.3345493274  | -0.5650997685 |
| C19                              | 1.2624999322  | 3.3303526881  | -1.5243493322 |
| H20                              | 1.6254012195  | 4.3520626680  | -1.3648575643 |



|     |               |               |               |
|-----|---------------|---------------|---------------|
| H21 | 0.1751716887  | 3.3447525595  | -1.4427001369 |
| H22 | 1.5083154993  | 3.0570532397  | -2.5586467331 |
| C23 | 3.4641911849  | 2.4460969710  | -0.7858567960 |
| H24 | 3.7030613622  | 2.1366400748  | -1.8117270532 |
| H25 | 4.0223567936  | 1.8049926117  | -0.1023801898 |
| H26 | 3.8086008493  | 3.4804805088  | -0.6754259039 |
| C27 | 1.4874501470  | 0.8577306194  | -0.7308347429 |
| H28 | 3.3391505819  | 0.1521649709  | 1.0966073910  |
| H29 | 1.9765895822  | 0.3251186217  | -1.5449056801 |
| H30 | 2.3172604748  | -0.3123052272 | 2.7695269846  |
| C31 | 0.9710151591  | -3.5883079350 | 1.6989607847  |
| C32 | -0.0428195838 | -2.9662284881 | 2.6817238694  |
| H33 | -0.4812804595 | -3.7733587901 | 3.2832931663  |
| H34 | -0.8590295911 | -2.4435985824 | 2.1821791589  |
| H35 | 0.4390253447  | -2.2496840844 | 3.3483779406  |
| C36 | 2.0490875455  | -4.2583995792 | 2.5778227656  |
| H37 | 2.6161869475  | -3.5215313971 | 3.1536679526  |
| H38 | 2.7487195129  | -4.8739157011 | 2.0094118425  |
| H39 | 1.5492244229  | -4.9203576441 | 3.2961285948  |
| C40 | 0.2470063188  | -4.6682885786 | 0.8676510843  |
| H41 | 0.8843042187  | -5.1244264762 | 0.1060694295  |
| H42 | -0.6438977703 | -4.2719556292 | 0.3723510714  |
| H43 | -0.0883399203 | -5.4704358433 | 1.5373744263  |
| C44 | 3.4264345566  | -2.8278862633 | -0.1257875188 |
| C45 | 4.5085108459  | -2.7979876705 | 0.9770321986  |
| H46 | 5.4863865893  | -2.9976589705 | 0.5206149489  |
| H47 | 4.3566420587  | -3.5473755439 | 1.7530140068  |
| H48 | 4.5480029489  | -1.8132528553 | 1.4503135833  |
| C49 | 3.3306580567  | -4.2322597123 | -0.7548136030 |
| H50 | 2.5745096039  | -4.2772740145 | -1.5464028388 |
| H51 | 3.1062698596  | -5.0130485040 | -0.0250017509 |
| H52 | 4.2940299812  | -4.4881642402 | -1.2146286176 |
| C53 | 3.9072158786  | -1.8502227732 | -1.2232976384 |
| H54 | 3.9259469597  | -0.8225069474 | -0.8567723612 |
| H55 | 3.3017134238  | -1.8938252857 | -2.1335393313 |
| H56 | 4.9275432934  | -2.1306212267 | -1.5120113540 |
| C57 | -1.7026853737 | -1.3765249836 | -0.4161461651 |
| C58 | -0.3444825695 | -0.8900275752 | -0.9592495118 |
| C59 | 0.1946895097  | 0.3934477051  | -0.2769021635 |
| C60 | -0.8859088746 | 1.4421897729  | 0.1011120611  |
| C61 | -2.1741908679 | 0.8234864009  | 0.6663485134  |
| C62 | -2.7315433829 | -0.2555075771 | -0.2626835658 |
| H63 | -1.5581763720 | -1.8456885457 | 0.5613902331  |
| H64 | -2.0819145360 | -2.1591516670 | -1.0868281056 |
| H65 | -0.5221461632 | -0.6230373199 | -2.0162798727 |
| H66 | -1.1801904732 | 1.9321387303  | -0.8411141800 |
| H67 | -1.9568421168 | 0.3868313903  | 1.6495982487  |
| H68 | -2.9105698094 | 1.6230864254  | 0.8227369882  |
| H69 | -2.9663519221 | 0.1810885817  | -1.2449998917 |
| H70 | -3.6724962202 | -0.6579642601 | 0.1325223399  |
| C71 | -0.3677415522 | 2.5528862233  | 1.0676503036  |
| H72 | -0.6498409804 | 3.5530301877  | 0.7187991101  |
| H73 | -0.8118746417 | 2.4079763294  | 2.0569825111  |
| C74 | 0.6769139430  | -2.0594333659 | -0.9805651216 |
| H75 | 1.3919643116  | -1.8992487184 | -1.7891198411 |
| H76 | 0.1672837305  | -2.9982876065 | -1.2160057648 |

**TS5-8**

|     |              |               |              |
|-----|--------------|---------------|--------------|
| H1  | 1.1438547849 | -0.3018279151 | 2.6892548517 |
| Ir2 | 1.8073991081 | 0.0194490272  | 1.2595622754 |
| P3  | 1.4302117312 | 2.3309830081  | 1.2963006994 |
| P4  | 1.7270306479 | -2.1963129027 | 0.5977811738 |
| C5  | 2.0675019695 | 3.7347077799  | 2.3862830949 |
| C6  | 1.3479742386 | 3.5936935817  | 3.7454544587 |
| H7  | 1.4845876377 | 2.5932401675  | 4.1683998140 |
| H8  | 0.2741945360 | 3.7907762956  | 3.6662100514 |
| H9  | 1.7661001359 | 4.3200368015  | 4.4530871017 |
| C10 | 1.7801652898 | 5.1199480043  | 1.7783907988 |
| H11 | 2.1150504019 | 5.9030355598  | 2.4708244545 |
| H12 | 0.7120023864 | 5.2785657512  | 1.5971360864 |
| H13 | 2.3119707266 | 5.2692131187  | 0.8336119843 |

|     |               |               |               |
|-----|---------------|---------------|---------------|
| C14 | 3.5822948817  | 3.5450298207  | 2.6043081373  |
| H15 | 4.1523986252  | 3.6929793848  | 1.6830899187  |
| H16 | 3.8046603487  | 2.5428829671  | 2.9820976990  |
| H17 | 3.9386008358  | 4.2801703895  | 3.3368821496  |
| C18 | 1.8420892156  | 2.4359088539  | -0.5559219310 |
| C19 | 1.0653531817  | 3.4174208994  | -1.4513814404 |
| H20 | 1.3855153243  | 4.4488910262  | -1.2702920865 |
| H21 | -0.0156501514 | 3.3750655478  | -1.3236047331 |
| H22 | 1.2806756813  | 3.1930805829  | -2.5043916046 |
| C23 | 3.3447347413  | 2.6609084459  | -0.8179790988 |
| H24 | 3.5783885107  | 2.3982497833  | -1.8581399802 |
| H25 | 3.9762609475  | 2.0535750769  | -0.1665928363 |
| H26 | 3.6142046924  | 3.7139099620  | -0.6851388276 |
| C27 | 1.4714418721  | 0.9328664561  | -0.7883907209 |
| H28 | 2.7248598282  | 0.3644992942  | -0.1404283408 |
| H29 | 1.7949652313  | 0.5541394384  | -1.7661743568 |
| H30 | 3.1552777190  | -0.1167952616 | 2.1741380243  |
| C31 | 0.8503323325  | -3.5134660317 | 1.7265316142  |
| C32 | -0.1593427410 | -2.8025748077 | 2.6530986192  |
| H33 | -0.7193642690 | -3.5668705600 | 3.2076072411  |
| H34 | -0.8752843593 | -2.1809847417 | 2.1157591075  |
| H35 | 0.3507072073  | -2.1538662155 | 3.3665766715  |
| C36 | 1.8543568073  | -4.2185569032 | 2.6637084091  |
| H37 | 2.4491663264  | -3.4985933253 | 3.2326914962  |
| H38 | 2.5302682154  | -4.8980087510 | 2.1408265656  |
| H39 | 1.2892082042  | -4.8207776955 | 3.3863364636  |
| C40 | 0.0960389248  | -4.5756107362 | 0.8979579041  |
| H41 | 0.7354927812  | -5.0918214803 | 0.1778809994  |
| H42 | -0.7488762812 | -4.1460966076 | 0.3531737495  |
| H43 | -0.3111371661 | -5.3351550647 | 1.5775142515  |
| C44 | 3.3985409206  | -2.9590769440 | -0.0434597853 |
| C45 | 4.4460618935  | -2.9542991309 | 1.0923702732  |
| H46 | 5.4251568262  | -3.2213607821 | 0.6745761602  |
| H47 | 4.2278522620  | -3.6699533413 | 1.8843211426  |
| H48 | 4.5217588974  | -1.9594509850 | 1.5396275314  |
| C49 | 3.2404745786  | -4.3750263620 | -0.6328682467 |
| H50 | 2.5114256254  | -4.4011974573 | -1.4502089980 |
| H51 | 2.9431060070  | -5.1157030250 | 0.1124220616  |
| H52 | 4.2023202878  | -4.7041525683 | -1.0473834217 |
| C53 | 3.9759235663  | -2.0505475472 | -1.1535295108 |
| H54 | 4.0912775340  | -1.0217388911 | -0.8063322270 |
| H55 | 3.3790591866  | -2.0509313854 | -2.0701221332 |
| H56 | 4.9695061627  | -2.4277005449 | -1.4245853511 |
| C57 | -1.6817888005 | -1.4010910487 | -0.5481180070 |
| C58 | -0.3029414327 | -0.8787479939 | -1.0046903543 |
| C59 | 0.1987252168  | 0.3766013315  | -0.2420474881 |
| C60 | -0.9020505858 | 1.3936591098  | 0.1506876091  |
| C61 | -2.1723737449 | 0.7135151178  | 0.6845385367  |
| C62 | -2.7174403540 | -0.2987051944 | -0.3237775262 |
| H63 | -1.5710884451 | -1.9568709800 | 0.3873828406  |
| H64 | -2.0410276718 | -2.1233133890 | -1.2936038644 |
| H65 | -0.4287167340 | -0.5928773404 | -2.0667119470 |
| H66 | -1.2253383834 | 1.9313925163  | -0.7572158761 |
| H67 | -1.9368719693 | 0.2070515282  | 1.6302064524  |
| H68 | -2.9221858387 | 1.4842186332  | 0.9083920554  |
| H69 | -2.9449144917 | 0.2100103925  | -1.2724180457 |
| H70 | -3.6601566971 | -0.7340937169 | 0.0305355152  |
| C71 | -0.4098659408 | 2.4609730917  | 1.1774431175  |
| H72 | -0.7570540360 | 3.4673239088  | 0.9133694601  |
| H73 | -0.8079528806 | 2.2218051250  | 2.1686539564  |
| C74 | 0.7271070458  | -2.0443981930 | -1.0045662099 |
| H75 | 1.4815092874  | -1.8535826268 | -1.7707883832 |
| H76 | 0.2429621351  | -2.9834681301 | -1.2911709327 |

8

|     |              |               |              |
|-----|--------------|---------------|--------------|
| C1  | 2.5438256468 | -0.8375143114 | 0.2968702954 |
| Ir2 | 2.8547682475 | -0.8848234107 | 2.5018166995 |
| P3  | 3.1013829263 | 1.3037063946  | 1.8020757546 |
| P4  | 2.8683425489 | -3.1936506651 | 2.3049085897 |
| C5  | 3.3274398883 | 2.8453210745  | 2.8824990015 |
| C6  | 1.9909718590 | 3.0343123721  | 3.6340967017 |

|     |               |               |               |
|-----|---------------|---------------|---------------|
| H7  | 1.6907042436  | 2.1173615389  | 4.1512825900  |
| H8  | 1.1800079890  | 3.3337691142  | 2.9626173915  |
| H9  | 2.1070681980  | 3.8252608408  | 4.3852586302  |
| C10 | 3.6564591137  | 4.1244329186  | 2.0918480600  |
| H11 | 3.6444107938  | 4.9871513785  | 2.7706357296  |
| H12 | 2.9281438954  | 4.3221771501  | 1.2984195370  |
| H13 | 4.6516032668  | 4.0815817141  | 1.6401808046  |
| C14 | 4.4350924377  | 2.5644228469  | 3.9185534265  |
| H15 | 5.4178715410  | 2.4493308610  | 3.4527445115  |
| H16 | 4.2212278615  | 1.6550502998  | 4.4871934540  |
| H17 | 4.4978559569  | 3.4048163751  | 4.6214629246  |
| C18 | 4.4132945380  | 1.0470915705  | 0.4452666549  |
| C19 | 4.4355791094  | 2.1200476878  | -0.6617593177 |
| H20 | 4.7399088144  | 3.1004302817  | -0.2858153567 |
| H21 | 3.4698362948  | 2.2323844971  | -1.1616321329 |
| H22 | 5.1617133341  | 1.8265888097  | -1.4306634151 |
| C23 | 5.8253784744  | 0.9333789734  | 1.0480761570  |
| H24 | 6.5247869929  | 0.5724858940  | 0.2831369676  |
| H25 | 5.8470785279  | 0.2312784495  | 1.8865018824  |
| H26 | 6.2007341103  | 1.9014567693  | 1.3984835198  |
| C27 | 1.3599010394  | -4.2171157140 | 2.9776270408  |
| C28 | 0.1676408344  | -3.2435829409 | 3.1181241064  |
| H29 | -0.6980038903 | -3.7916197011 | 3.5134088946  |
| H30 | -0.1315247919 | -2.7933842596 | 2.1710343719  |
| H31 | 0.4094731176  | -2.4275370424 | 3.8039254446  |
| C32 | 1.6249730139  | -4.7722790423 | 4.3923206593  |
| H33 | 1.9353861048  | -3.9879467283 | 5.0881233462  |
| H34 | 2.3709013785  | -5.5700267836 | 4.4050912361  |
| H35 | 0.6904956182  | -5.1998455183 | 4.7776007547  |
| C36 | 0.9711848397  | -5.3867090645 | 2.0521467191  |
| H37 | 1.7931098506  | -6.0939652472 | 1.9047710485  |
| H38 | 0.6386806598  | -5.0443941493 | 1.0691515230  |
| H39 | 0.1378695174  | -5.9424405720 | 2.5017113407  |
| C40 | 4.5209694657  | -4.0383400152 | 2.8511088631  |
| C41 | 4.7488519138  | -3.8862319120 | 4.3721309178  |
| H42 | 5.7783914465  | -4.1844546676 | 4.6078129230  |
| H43 | 4.0893168511  | -4.5113664469 | 4.9725307304  |
| H44 | 4.6189103599  | -2.8468807318 | 4.6857902269  |
| C45 | 4.5993447839  | -5.5221255431 | 2.4424041276  |
| H46 | 4.4674200845  | -5.6587791632 | 1.3638477697  |
| H47 | 3.8561994994  | -6.1387589598 | 2.9550632254  |
| H48 | 5.5877815413  | -5.9233898350 | 2.7025400464  |
| C49 | 5.6793442737  | -3.2725340029 | 2.1682827656  |
| H50 | 5.6145578597  | -2.2004484293 | 2.3735526225  |
| H51 | 5.7145415873  | -3.4166679079 | 1.0850140974  |
| H52 | 6.6309618638  | -3.6429210310 | 2.5690203148  |
| C53 | 0.7652668775  | -2.5686015799 | -0.5710349166 |
| C54 | 2.2570243072  | -2.2367561210 | -0.3472670272 |
| C55 | 1.5371532176  | 0.2678280243  | -0.1795585704 |
| C56 | 0.0760885832  | -0.1908981209 | -0.2834378026 |
| C57 | -0.0447578746 | -1.4236561423 | -1.1789354525 |
| H58 | 0.3006009101  | -2.8373958344 | 0.3821432664  |
| H59 | 0.7016761730  | -3.4643638810 | -1.2038871548 |
| H60 | 2.7111193895  | -2.2369042073 | -1.3564086644 |
| H61 | -0.3060151103 | -0.4266472456 | 0.7202202828  |
| H62 | -0.5354553667 | 0.6362307195  | -0.6695120934 |
| H63 | 0.3258850318  | -1.1865256324 | -2.1869815977 |
| H64 | -1.0943053317 | -1.7229091045 | -1.2935673849 |
| C65 | 1.6274619737  | 1.5465303268  | 0.7132381226  |
| H66 | 1.6603147140  | 2.4691090526  | 0.1219905761  |
| H67 | 0.7484951503  | 1.6063023286  | 1.3628940114  |
| C68 | 2.9354303028  | -3.4034127977 | 0.4207142518  |
| H69 | 4.0020292079  | -3.4124685628 | 0.1867040120  |
| H70 | 2.5469816081  | -4.3715538489 | 0.0867678740  |
| H71 | 2.3458926510  | -0.7779777133 | 4.0084085646  |
| C72 | 3.9611763911  | -0.3499288934 | -0.1491948344 |
| H73 | 3.9914871115  | -0.2778528276 | -1.2524817202 |
| H74 | 4.7157072067  | -1.0940059019 | 0.1265597800  |
| H75 | 3.9261831038  | -0.8538104466 | 3.6771439900  |
| H76 | 1.8311095458  | 0.5606747845  | -1.2049459077 |

|     |               |               |               |
|-----|---------------|---------------|---------------|
| C1  | 2.6022792844  | -0.7986988002 | 0.2677718995  |
| Ir2 | 2.8741737926  | -0.8699655651 | 2.5115247079  |
| P3  | 3.1154691224  | 1.3162952078  | 1.7734987011  |
| P4  | 2.8670605682  | -3.2020371527 | 2.3213612395  |
| C5  | 3.3442136378  | 2.8243000065  | 2.8961032779  |
| C6  | 2.0361632179  | 2.9559232036  | 3.7072212266  |
| H7  | 1.7793867953  | 2.0170682835  | 4.2067046639  |
| H8  | 1.1917077554  | 3.2543745026  | 3.0777649019  |
| H9  | 2.1650809648  | 3.7279781679  | 4.4756065849  |
| C10 | 3.6063020764  | 4.1346421524  | 2.1311105178  |
| H11 | 3.6019861186  | 4.9747254132  | 2.8376128508  |
| H12 | 2.8389920064  | 4.3375241488  | 1.3768482781  |
| H13 | 4.5817721267  | 4.1322287881  | 1.6366998148  |
| C14 | 4.5051693208  | 2.5435834110  | 3.8721820208  |
| H15 | 5.4666879370  | 2.4603810109  | 3.3576299383  |
| H16 | 4.3378119861  | 1.6175769660  | 4.4289845580  |
| H17 | 4.5830987762  | 3.3694139490  | 4.5905265440  |
| C18 | 4.3735142005  | 1.1548121282  | 0.3465713374  |
| C19 | 4.2742170079  | 2.2651782476  | -0.7230522286 |
| H20 | 4.5284967275  | 3.2509208454  | -0.3253288887 |
| H21 | 3.2847625392  | 2.3290169757  | -1.1820353758 |
| H22 | 4.9864963687  | 2.0476501166  | -1.5286056335 |
| C23 | 5.8278904614  | 1.1152069731  | 0.8494912684  |
| H24 | 6.4881888214  | 0.8042449329  | 0.0300380056  |
| H25 | 5.9561527318  | 0.4066811566  | 1.6711827334  |
| H26 | 6.1701358357  | 2.1017061472  | 1.1827679711  |
| C27 | 1.3292302381  | -4.2225619279 | 2.9456110670  |
| C28 | 0.0942993575  | -3.2987351521 | 3.0215957860  |
| H29 | -0.7660474973 | -3.8970229480 | 3.3483500782  |
| H30 | -0.1654476656 | -2.8394594657 | 2.0684319217  |
| H31 | 0.2496671189  | -2.4907921798 | 3.7383204421  |
| C32 | 1.5365417930  | -4.7339346899 | 4.3889453556  |
| H33 | 1.7901978080  | -3.9182472811 | 5.0723183052  |
| H34 | 2.2973153191  | -5.5108940835 | 4.4743199437  |
| H35 | 0.5925758890  | -5.1696865190 | 4.7395307716  |
| C36 | 1.0050005289  | -5.4142567152 | 2.0203536322  |
| H37 | 1.8413538687  | -6.1086905581 | 1.9103806800  |
| H38 | 0.7044365961  | -5.0864423570 | 1.0217887384  |
| H39 | 0.1639038718  | -5.9791064067 | 2.4426434035  |
| C40 | 4.4746795669  | -4.1325036735 | 2.9066316191  |
| C41 | 4.7215252531  | -3.8651695303 | 4.4081100545  |
| H42 | 5.6808977600  | -4.3130326282 | 4.6967319841  |
| H43 | 3.9575038972  | -4.2912000589 | 5.0575189066  |
| H44 | 4.7748360178  | -2.7914374273 | 4.6051366413  |
| C45 | 4.4291582157  | -5.6494374029 | 2.6237712068  |
| H46 | 4.2633200803  | -5.8611693783 | 1.5620085163  |
| H47 | 3.6658085576  | -6.1759464872 | 3.1986958926  |
| H48 | 5.3967990573  | -6.0921235504 | 2.8927133881  |
| C49 | 5.7111932008  | -3.5790340864 | 2.1592819032  |
| H50 | 5.7742490329  | -2.4914501684 | 2.2188317417  |
| H51 | 5.7414511153  | -3.8757753126 | 1.1070951511  |
| H52 | 6.6094167203  | -3.9965559070 | 2.6299726739  |
| C53 | 0.8464421920  | -2.5746589184 | -0.6032883382 |
| C54 | 2.3278399496  | -2.2146511598 | -0.3479732836 |
| C55 | 1.5272331350  | 0.2728204584  | -0.1608866314 |
| C56 | 0.0836236247  | -0.2287805081 | -0.2788292853 |
| C57 | 0.0121798484  | -1.4436540112 | -1.2035514675 |
| H58 | 0.3743290847  | -2.8743101936 | 0.3355869796  |
| H59 | 0.8197317028  | -3.4604836876 | -1.2525409635 |
| H60 | 2.8050056897  | -2.2226318120 | -1.3447235498 |
| H61 | -0.2997596235 | -0.4961211089 | 0.7149216117  |
| H62 | -0.5477462951 | 0.5890430503  | -0.6524669542 |
| H63 | 0.3893343096  | -1.1755436767 | -2.2015276758 |
| H64 | -1.0254642930 | -1.7737389384 | -1.3394464635 |
| C65 | 1.5926492494  | 1.5354014683  | 0.7541340166  |
| H66 | 1.5650973476  | 2.4689128438  | 0.1811791379  |
| H67 | 0.7437886019  | 1.5393559895  | 1.4432936808  |
| C68 | 3.0038278820  | -3.3645622955 | 0.4420699597  |
| H69 | 4.0797201278  | -3.3214354047 | 0.2647296537  |
| H70 | 2.6689034411  | -4.3408740332 | 0.0739835316  |

|     |              |               |               |
|-----|--------------|---------------|---------------|
| H71 | 2.1006165992 | -0.6922446706 | 3.9245984707  |
| C72 | 3.9534159179 | -0.2392356865 | -0.2735620991 |
| H73 | 3.8904599888 | -0.1157610291 | -1.3692104042 |
| H74 | 4.7514731769 | -0.9623878472 | -0.0850252429 |
| H75 | 1.2460054908 | -0.7709296693 | 2.3673486165  |
| H76 | 3.8227706765 | -0.8141755654 | 3.8268075550  |
| H77 | 1.8023728758 | 0.5953277063  | -1.1801796545 |
| H78 | 4.4414428181 | -1.0515331286 | 2.0875277912  |

**TS8-9**

|     |               |               |               |
|-----|---------------|---------------|---------------|
| H1  | 1.7463988238  | -0.1050314735 | 2.8130756150  |
| Ir2 | 1.6024981790  | 0.1166842012  | 1.2504859789  |
| P3  | 0.9614723744  | 2.3426021284  | 1.1577507988  |
| P4  | 1.9545087505  | -2.1293148179 | 0.8022858497  |
| C5  | 1.2528687521  | 3.7605677751  | 2.3765550568  |
| C6  | 0.3397197162  | 3.5059022813  | 3.5958128425  |
| H7  | 0.4802548292  | 2.4975478204  | 3.9987853383  |
| H8  | -0.7196949936 | 3.6372764193  | 3.3550730794  |
| H9  | 0.5879485114  | 4.2229262477  | 4.3879813075  |
| C10 | 0.9295301715  | 5.1344812456  | 1.7604729044  |
| H11 | 1.0464784915  | 5.9172552513  | 2.5211101993  |
| H12 | -0.0998020554 | 5.1892010761  | 1.3901859702  |
| H13 | 1.6023395649  | 5.3792594451  | 0.9329986307  |
| C14 | 2.7203158110  | 3.7143304586  | 2.8498227346  |
| H15 | 3.4227734372  | 3.9340481807  | 2.0420588399  |
| H16 | 2.9725719823  | 2.7302898301  | 3.2545140532  |
| H17 | 2.8714238056  | 4.4650818202  | 3.6359649387  |
| C18 | 1.6620554926  | 2.5551637624  | -0.5886969866 |
| C19 | 3.1546823515  | 2.9311526529  | -0.5604704852 |
| H20 | 3.7166490072  | 2.2768029079  | 0.1106530289  |
| H21 | 3.3062454192  | 3.9708676082  | -0.2499006482 |
| H22 | 3.5721620323  | 2.8288848200  | -1.5699222398 |
| C23 | 1.5068813992  | 1.0546098223  | -1.0131609286 |
| H24 | 0.8078607418  | 0.9290512783  | -1.8401892538 |
| H25 | 3.1858987166  | 0.4534474425  | 1.5886183736  |
| H26 | 2.4578953998  | 0.6148616961  | -1.3080944717 |
| C27 | 0.9214475857  | 3.5200520984  | -1.5304744969 |
| H28 | 1.3445806655  | 3.4364259248  | -2.5401841292 |
| H29 | 1.0304212908  | 4.5636114033  | -1.2155287874 |
| H30 | -0.1465593661 | 3.3008602547  | -1.6069519226 |
| C31 | 1.4567679639  | -3.3590149881 | 2.2002620840  |
| C32 | 2.2243076887  | -3.0111923563 | 3.4942208711  |
| H33 | 3.2996833984  | -3.1763449448 | 3.4091784824  |
| H34 | 1.8560613686  | -3.6519248168 | 4.3056711385  |
| H35 | 2.0632794434  | -1.9690227272 | 3.7782116550  |
| C36 | 1.6739133808  | -4.8454365554 | 1.8588253690  |
| H37 | 2.7322126148  | -5.1157507244 | 1.8245366467  |
| H38 | 1.2133891542  | -5.1296315302 | 0.9065090747  |
| H39 | 1.2102730300  | -5.4626656691 | 2.6394226434  |
| C40 | -0.0448928946 | -3.1450457685 | 2.4823283358  |
| H41 | -0.6693032069 | -3.5434231839 | 1.6780157680  |
| H42 | -0.2799676877 | -2.0864354530 | 2.6200873017  |
| H43 | -0.3148668016 | -3.6843362539 | 3.3989311241  |
| C44 | 3.6566712973  | -2.6612144286 | 0.0611789683  |
| C45 | 4.7163354992  | -2.7625588882 | 1.1761581320  |
| H46 | 5.7105464537  | -2.8562346629 | 0.7210160492  |
| H47 | 4.5700421410  | -3.6407551054 | 1.8106665976  |
| H48 | 4.7189130416  | -1.8688476180 | 1.8072844263  |
| C49 | 3.6207045897  | -3.9809152936 | -0.7388258167 |
| H50 | 2.9036683403  | -3.9496304591 | -1.5648340116 |
| H51 | 3.3864616378  | -4.8493461338 | -0.1226911832 |
| H52 | 4.6104982553  | -4.1529756990 | -1.1809679406 |
| C53 | 4.0996750756  | -1.5358269793 | -0.8979459856 |
| H54 | 4.1814841921  | -0.5823892125 | -0.3716188852 |
| H55 | 3.4102345971  | -1.4097571402 | -1.7395821504 |
| H56 | 5.0809658748  | -1.7907911474 | -1.3183512762 |
| C57 | -1.7245019221 | -1.8558672193 | -0.4913422993 |
| C58 | -0.3039297560 | -1.3002171957 | -0.7825093929 |
| C59 | -0.0242773304 | -0.0464864225 | 0.0655369618  |
| C60 | -1.1319676449 | 1.0151278247  | -0.0622988582 |
| C61 | -2.5114646094 | 0.4003384402  | 0.2663269368  |

|     |               |               |               |
|-----|---------------|---------------|---------------|
| C62 | -2.8161549058 | -0.7932239592 | -0.6413688640 |
| H63 | -1.7582801103 | -2.2497647757 | 0.5291956821  |
| H64 | -1.9148111894 | -2.7013722338 | -1.1652032297 |
| H65 | -0.3246530303 | -1.0038556469 | -1.8467859449 |
| H66 | -1.2019089018 | 1.3556614811  | -1.1099942165 |
| H67 | -2.5168196087 | 0.0768988898  | 1.3161220688  |
| H68 | -3.2819399814 | 1.1763354764  | 0.1668645541  |
| H69 | -2.8725014795 | -0.4571899648 | -1.6869575836 |
| H70 | -3.7962022627 | -1.2223957389 | -0.3981906466 |
| C71 | -0.8612110204 | 2.2468096981  | 0.8359856865  |
| H72 | -1.2853634577 | 3.1636499257  | 0.4098716094  |
| H73 | -1.3327861502 | 2.0862796190  | 1.8109002321  |
| C74 | 0.7762508266  | -2.4128978532 | -0.6429049816 |
| H75 | 1.4041167897  | -2.4177819278 | -1.5385747326 |
| H76 | 0.3155922198  | -3.4061533005 | -0.5951209794 |

9

|     |               |               |               |
|-----|---------------|---------------|---------------|
| H1  | 1.3181900264  | -0.0675611354 | 2.7807596138  |
| Ir2 | 1.5241512059  | 0.1276133594  | 1.1819966572  |
| P3  | 1.0040160238  | 2.3536771569  | 1.1004420406  |
| P4  | 1.8697649039  | -2.1833397953 | 0.9160281378  |
| C5  | 0.8328651303  | 3.5785688284  | 2.5419259438  |
| C6  | -0.3299641924 | 3.0950624960  | 3.4358468970  |
| H7  | -0.2004332163 | 2.0471682793  | 3.7241081499  |
| H8  | -1.3065790828 | 3.2016308252  | 2.9546277377  |
| H9  | -0.3527671876 | 3.6998230396  | 4.3504201158  |
| C10 | 0.5506459318  | 5.0022630827  | 2.0255865776  |
| H11 | 0.4344786312  | 5.6900207826  | 2.8733384022  |
| H12 | -0.3720150699 | 5.0505055769  | 1.4369150395  |
| H13 | 1.3692629787  | 5.3810360715  | 1.4047466588  |
| C14 | 2.1182140641  | 3.5556866482  | 3.3933926057  |
| H15 | 2.9744840459  | 3.9825244095  | 2.8686969794  |
| H16 | 2.3744031947  | 2.5348499924  | 3.6909370316  |
| H17 | 1.9568642934  | 4.1504281982  | 4.3010863967  |
| C18 | 2.3353226168  | 2.6902271969  | -0.1987949939 |
| C19 | 3.6402077203  | 3.2414110642  | 0.3954552430  |
| H20 | 3.9824216766  | 2.6364789693  | 1.2383767480  |
| H21 | 3.5472530287  | 4.2853589160  | 0.7156552317  |
| H22 | 4.4173999630  | 3.2049322852  | -0.3786438109 |
| C23 | 2.5054666952  | 1.1723081077  | -0.5453099778 |
| H24 | 1.9940516631  | 0.9456189598  | -1.4859066958 |
| H25 | 3.0396065066  | 0.3824004292  | 1.8572466844  |
| H26 | 3.5591272866  | 0.9094448415  | -0.6544822042 |
| C27 | 1.9171298736  | 3.5554527457  | -1.3965348469 |
| H28 | 2.7169608285  | 3.5465570617  | -2.1487267541 |
| H29 | 1.7433654320  | 4.6007947782  | -1.1106775582 |
| H30 | 1.0115228186  | 3.1814629009  | -1.8843940128 |
| C31 | 1.9650715086  | -3.2960944027 | 2.4894794003  |
| C32 | 3.3625096340  | -3.1733759337 | 3.1271375132  |
| H33 | 4.1379812028  | -3.6560978343 | 2.5255035242  |
| H34 | 3.3599521725  | -3.6657266505 | 4.1078263489  |
| H35 | 3.6401220783  | -2.1254043264 | 3.2759538613  |
| C36 | 1.6365482382  | -4.7811373378 | 2.2175279155  |
| H37 | 2.3605641171  | -5.2740469751 | 1.5701317196  |
| H38 | 0.6432606177  | -4.9101099200 | 1.7761172608  |
| H39 | 1.6343805373  | -5.3212682603 | 3.1726733974  |
| C40 | 0.9276979755  | -2.7811378121 | 3.5115123001  |
| H41 | -0.0938151712 | -2.7967620716 | 3.1176552125  |
| H42 | 1.1429585267  | -1.7596864358 | 3.8259252375  |
| H43 | 0.9521124336  | -3.4358499959 | 4.3919309190  |
| C44 | 3.2321263666  | -2.7136070882 | -0.3392582744 |
| C45 | 4.5571586007  | -2.0203261640 | 0.0425752073  |
| H46 | 5.2936212632  | -2.1806190542 | -0.7556375520 |
| H47 | 4.9823631612  | -2.4212759878 | 0.9661293814  |
| H48 | 4.4168806814  | -0.9466364451 | 0.1804494141  |
| C49 | 3.4726431176  | -4.2289579838 | -0.4749819341 |
| H50 | 2.5529290815  | -4.7841064367 | -0.6868026848 |
| H51 | 3.9409989400  | -4.6597714248 | 0.4131689323  |
| H52 | 4.1574523014  | -4.4045489581 | -1.3149546736 |
| C53 | 2.7850307507  | -2.1868040000 | -1.7212796647 |
| H54 | 2.5536956002  | -1.1216173557 | -1.6962071123 |

|     |               |               |               |
|-----|---------------|---------------|---------------|
| H55 | 1.9114152017  | -2.7253930333 | -2.1023322851 |
| H56 | 3.5990378855  | -2.3391222825 | -2.4408727731 |
| C57 | -1.9947179355 | -1.7507161988 | -0.5779908287 |
| C58 | -0.4667824381 | -1.5033991525 | -0.5165216128 |
| C59 | -0.1003260807 | -0.1608579965 | 0.1246334982  |
| C60 | -0.9066717130 | 1.0039398932  | -0.4710111212 |
| C61 | -2.4277890622 | 0.7231295568  | -0.5507934119 |
| C62 | -2.7357231144 | -0.5979035336 | -1.2606566095 |
| H63 | -2.3725208392 | -1.8696114225 | 0.4476750466  |
| H64 | -2.1904718048 | -2.6984458105 | -1.0955989675 |
| H65 | -0.1217060064 | -1.4308271153 | -1.5636457401 |
| H66 | -0.5489095391 | 1.0911514738  | -1.5140845331 |
| H67 | -2.8288064933 | 0.6867861730  | 0.4723179407  |
| H68 | -2.9290373022 | 1.5603338378  | -1.0533652194 |
| H69 | -2.4290442794 | -0.5331670689 | -2.3146083054 |
| H70 | -3.8165575051 | -0.7860592409 | -1.2615298914 |
| C71 | -0.6494827760 | 2.3560552784  | 0.2365588871  |
| H72 | -0.7710200865 | 3.2019141135  | -0.4486403415 |
| H73 | -1.3971358042 | 2.4807355316  | 1.0266354152  |
| C74 | 0.2459171887  | -2.7009778968 | 0.1446441321  |
| H75 | 0.3559438079  | -3.5391809383 | -0.5525989330 |
| H76 | -0.3776682607 | -3.0621312611 | 0.9695076528  |

### TS9-10

|     |               |               |               |
|-----|---------------|---------------|---------------|
| H1  | -0.0972134065 | -0.2889020446 | 1.6631569542  |
| I:2 | 1.5039326340  | 0.1435499908  | 1.1462837818  |
| P3  | 1.0330393017  | 2.3526531513  | 1.0170400423  |
| P4  | 1.8904007951  | -2.1560217956 | 0.8189461485  |
| C5  | 0.7412177395  | 3.5012568064  | 2.5021915887  |
| C6  | -0.4868962797 | 2.9535516409  | 3.2628848240  |
| H7  | -0.3368259574 | 1.9089640158  | 3.5509220513  |
| H8  | -1.4117190043 | 3.0193894942  | 2.6813172164  |
| H9  | -0.6349932632 | 3.5446494937  | 4.1751526818  |
| C10 | 0.4838130625  | 4.9526263324  | 2.0545059278  |
| H11 | 0.2758645513  | 5.5804430600  | 2.9304540564  |
| H12 | -0.3806305797 | 5.0304232986  | 1.3859875483  |
| H13 | 1.3496603428  | 5.3802727160  | 1.5405998877  |
| C14 | 1.9496638336  | 3.4317012298  | 3.4565520587  |
| H15 | 2.8371983973  | 3.9140059185  | 3.0417450396  |
| H16 | 2.2004422348  | 2.3942101494  | 3.6953017273  |
| H17 | 1.7016473848  | 3.9529760235  | 4.3895907631  |
| C18 | 2.6476010222  | 2.6031946867  | 0.0237320424  |
| C19 | 3.5253025334  | 3.8335678578  | 0.2900845636  |
| H20 | 3.8345869049  | 3.9113211242  | 1.3341739756  |
| H21 | 3.0332351731  | 4.7708401855  | 0.0023462246  |
| H22 | 4.4411103993  | 3.7478374049  | -0.3095827471 |
| C23 | 3.2752621661  | 1.2472782102  | 0.5048603721  |
| H24 | 3.8079150414  | 0.7719312271  | -0.3268442536 |
| H25 | 2.2365430555  | 0.1942125192  | 2.6283044168  |
| H26 | 3.9920884683  | 1.4260482931  | 1.3103597347  |
| C27 | 2.3252270288  | 2.5505966219  | -1.4795504753 |
| H28 | 3.2657267743  | 2.4900050308  | -2.0412391388 |
| H29 | 1.7950022615  | 3.4469634367  | -1.8231552759 |
| H30 | 1.7283554153  | 1.6698646297  | -1.7320787018 |
| C31 | 2.0280427403  | -3.2705231557 | 2.3834271244  |
| C32 | 3.4396737555  | -3.1508772947 | 2.9906465084  |
| H33 | 4.1935408996  | -3.6723984384 | 2.3941964305  |
| H34 | 3.4446093743  | -3.6078192699 | 3.9883071132  |
| H35 | 3.7395507609  | -2.1041015951 | 3.0987335502  |
| C36 | 1.6910539376  | -4.7570283962 | 2.1436663583  |
| H37 | 2.4096893969  | -5.2588782371 | 1.4943739796  |
| H38 | 0.6938687776  | -4.8956151509 | 1.7146650547  |
| H39 | 1.7009349234  | -5.2825031875 | 3.1072395577  |
| C40 | 1.0227753502  | -2.7101083881 | 3.4154391149  |
| H41 | -0.0135284045 | -2.7752426399 | 3.0678922689  |
| H42 | 1.2315833402  | -1.6634178458 | 3.6431711124  |
| H43 | 1.0976491810  | -3.3011844773 | 4.3374256129  |
| C44 | 3.1867036427  | -2.6641067754 | -0.5050276339 |
| C45 | 4.5821434197  | -2.1477208173 | -0.0948935633 |
| H46 | 5.2734127180  | -2.2650377616 | -0.9394690662 |
| H47 | 4.9994443429  | -2.7062862233 | 0.7458475977  |

|     |               |               |               |
|-----|---------------|---------------|---------------|
| H48 | 4.5567576622  | -1.0925197896 | 0.1808265684  |
| C49 | 3.2728293610  | -4.1753155782 | -0.7897696898 |
| H50 | 2.2964380808  | -4.6243797032 | -0.9995166852 |
| H51 | 3.7323592089  | -4.7241220586 | 0.0361436436  |
| H52 | 3.9024797349  | -4.3396367247 | -1.6741401067 |
| C53 | 2.7626147318  | -1.9430086575 | -1.8052731848 |
| H54 | 2.6378973519  | -0.8696334987 | -1.6461081778 |
| H55 | 1.8239094947  | -2.3391356208 | -2.2067262147 |
| H56 | 3.5353650634  | -2.0953400321 | -2.5694887565 |
| C57 | -2.0888260391 | -1.7142643464 | -0.2025822090 |
| C58 | -0.5786675412 | -1.4991366091 | -0.4772432898 |
| C59 | -0.0726239720 | -0.1282165255 | -0.0125699528 |
| C60 | -0.9903209749 | 1.0246801978  | -0.4604828738 |
| C61 | -2.4875190495 | 0.7845180063  | -0.1573539276 |
| C62 | -2.9582160366 | -0.5623322387 | -0.7202596175 |
| H63 | -2.2255142869 | -1.8074326923 | 0.8846168775  |
| H64 | -2.4146748916 | -2.6659520433 | -0.6427797391 |
| H65 | -0.4473547371 | -1.4808242649 | -1.5723440658 |
| H66 | -0.8915756730 | 0.9823941402  | -1.5588601950 |
| H67 | -2.6359457760 | 0.8060929049  | 0.9317682525  |
| H68 | -3.0900889137 | 1.6014146901  | -0.5758434557 |
| H69 | -2.9132511591 | -0.5314817669 | -1.8188485453 |
| H70 | -4.0092218704 | -0.7375611860 | -0.4590241323 |
| C71 | -0.5277228547 | 2.4474202454  | -0.0216316937 |
| H72 | -0.3757317697 | 3.0946867486  | -0.8904180403 |
| H73 | -1.3056625920 | 2.9259643092  | 0.5810099213  |
| C74 | 0.2392004788  | -2.6845599612 | 0.0909229331  |
| H75 | 0.3524657354  | -3.4797455186 | -0.6535313033 |
| H76 | -0.3218980080 | -3.1243736666 | 0.9214769198  |

## 10

|     |               |               |               |
|-----|---------------|---------------|---------------|
| H1  | -1.0270142880 | -0.4989682729 | 1.2443059048  |
| Ir2 | 1.6131629961  | 0.1003509475  | 1.2345206329  |
| P3  | 0.9071648819  | 2.2814998674  | 1.2755437400  |
| P4  | 1.9113087788  | -2.1640060882 | 0.7383999905  |
| C5  | 0.8950052761  | 3.5914136587  | 2.6580644016  |
| C6  | -0.2192564528 | 3.2030508150  | 3.6559418621  |
| H7  | -0.0955832152 | 2.1768942268  | 4.0183231130  |
| H8  | -1.2205570347 | 3.2973889104  | 3.2264908494  |
| H9  | -0.1726695733 | 3.8710915286  | 4.5249604508  |
| C10 | 0.6183876554  | 4.9996969667  | 2.0976492903  |
| H11 | 0.5781533930  | 5.7266230634  | 2.9195056690  |
| H12 | -0.3396236889 | 5.0496933007  | 1.5694251833  |
| H13 | 1.4030634907  | 5.3267871260  | 1.4086566606  |
| C14 | 2.2378849051  | 3.5642212723  | 3.4161646687  |
| H15 | 3.0643860020  | 3.9443280583  | 2.8138009618  |
| H16 | 2.4942110345  | 2.5490412946  | 3.7326726371  |
| H17 | 2.1605193438  | 4.1978211063  | 4.3088534284  |
| C18 | 2.1010132979  | 2.6130050229  | -0.1774108923 |
| C19 | 3.4362583169  | 3.2266604404  | 0.2755451772  |
| H20 | 3.8787839144  | 2.6503813845  | 1.0912332274  |
| H21 | 3.3345622531  | 4.2722269065  | 0.5849354818  |
| H22 | 4.1359511157  | 3.2062162517  | -0.5698476768 |
| C23 | 2.3000054161  | 1.0957031015  | -0.4786976143 |
| H24 | 1.7049589091  | 0.7872733546  | -1.3451618478 |
| H25 | 3.1041849272  | 0.3388390127  | 1.9572868078  |
| H26 | 3.3529530452  | 0.8611277046  | -0.6607307300 |
| C27 | 1.5419718568  | 3.4245354263  | -1.3558034163 |
| H28 | 2.2617388542  | 3.4133026149  | -2.1845281109 |
| H29 | 1.3771072195  | 4.4727145117  | -1.0800973157 |
| H30 | 0.5996157988  | 3.0215297278  | -1.7352761162 |
| C31 | 1.9897757528  | -3.0793289423 | 2.4206580084  |
| C32 | 3.4141091366  | -3.0206380716 | 3.0053627235  |
| H33 | 4.1046470122  | -3.6814673817 | 2.4731051664  |
| H34 | 3.3897539384  | -3.3544739186 | 4.0507099984  |
| H35 | 3.8123394041  | -2.0024268985 | 2.9818623378  |
| C36 | 1.4945661729  | -4.5378578954 | 2.4097032105  |
| H37 | 2.1354367126  | -5.1916115021 | 1.8137632790  |
| H38 | 0.4725948149  | -4.6310556915 | 2.0309364545  |
| H39 | 1.4957740895  | -4.9269247289 | 3.4363961574  |
| C40 | 1.0625444608  | -2.2347012049 | 3.3289750229  |



|     |               |               |               |
|-----|---------------|---------------|---------------|
| H41 | 0.0219866087  | -2.2434692316 | 2.9913381066  |
| H42 | 1.4088218677  | -1.1878363501 | 3.3810448469  |
| H43 | 1.0842213273  | -2.6273637827 | 4.3541846327  |
| C44 | 3.2357607484  | -2.8034385674 | -0.4823945915 |
| C45 | 4.6005426883  | -2.1776577260 | -0.1265050815 |
| H46 | 5.3254200047  | -2.4157296321 | -0.9157423896 |
| H47 | 5.0008900925  | -2.5614505449 | 0.8142320422  |
| H48 | 4.5278118687  | -1.0912185199 | -0.0352998175 |
| C49 | 3.3540870729  | -4.3384737991 | -0.5163910868 |
| H50 | 2.3947513526  | -4.8253736730 | -0.7215164630 |
| H51 | 3.7505276375  | -4.7425071684 | 0.4188633445  |
| H52 | 4.0466768428  | -4.6323961766 | -1.3160160541 |
| C53 | 2.8311643797  | -2.3089301402 | -1.8894107471 |
| H54 | 2.7242880189  | -1.2222954186 | -1.9246366396 |
| H55 | 1.8958000654  | -2.7576889426 | -2.2366101413 |
| H56 | 3.6145581405  | -2.5910753828 | -2.6041102341 |
| C57 | -1.8910813040 | -1.7433599032 | -1.0271715635 |
| C58 | -0.4387956693 | -1.4474997442 | -0.5927306844 |
| C59 | -0.3762113112 | -0.2484449514 | 0.3798125707  |
| C60 | -0.9959717152 | 0.9947046336  | -0.2974324349 |
| C61 | -2.4610653244 | 0.7375689045  | -0.7097651706 |
| C62 | -2.5623147159 | -0.4943197341 | -1.6292687120 |
| H63 | -2.4615292680 | -2.0768817379 | -0.1469223861 |
| H64 | -1.9283230318 | -2.5673581589 | -1.7542386652 |
| H65 | 0.1197565863  | -1.1662515978 | -1.4998993634 |
| H66 | -0.4394941687 | 1.1701950020  | -1.2309245423 |
| H67 | -3.0634760192 | 0.5735467266  | 0.1964065745  |
| H68 | -2.8904941174 | 1.6124133059  | -1.2186274474 |
| H69 | -2.0784271295 | -0.2593197719 | -2.5887980159 |
| H70 | -3.6136131994 | -0.7070440907 | -1.8616259855 |
| C71 | -0.8336648504 | 2.2521489963  | 0.5790581264  |
| H72 | -1.0911323491 | 3.1735677098  | 0.0428913245  |
| H73 | -1.5119341208 | 2.1782879122  | 1.4377227634  |
| C74 | 0.2529962043  | -2.6811175284 | 0.0164174177  |
| H75 | 0.3449201699  | -3.5095378382 | -0.6958927849 |
| H76 | -0.3577427524 | -3.0535047071 | 0.8477606707  |

## 11

|     |               |               |               |
|-----|---------------|---------------|---------------|
| H1  | 3.0237368521  | 0.0578255658  | 2.0686242680  |
| Ir2 | 1.4455372304  | -0.1300110495 | 1.8203238467  |
| P3  | 1.3066473581  | -2.4206626838 | 1.5113566557  |
| P4  | 0.9388330570  | 2.1793957894  | 1.9072028581  |
| C5  | 2.7156065273  | -3.6751711857 | 1.2908354096  |
| C6  | 3.3668101195  | -3.4166625186 | -0.0851648855 |
| H7  | 3.6522770284  | -2.3660759032 | -0.2030298893 |
| H8  | 2.7100967328  | -3.6908298787 | -0.9157923563 |
| H9  | 4.2758400491  | -4.0242058670 | -0.1735637025 |
| C10 | 2.1849639618  | -5.1202930600 | 1.3575673934  |
| H11 | 3.0091016248  | -5.8266418699 | 1.1935310428  |
| H12 | 1.4288494801  | -5.3162937562 | 0.5900599432  |
| H13 | 1.7452995022  | -5.3492582314 | 2.3333320457  |
| C14 | 3.7865624213  | -3.4466033838 | 2.3760897222  |
| H15 | 3.4215796428  | -3.6780097428 | 3.3785283644  |
| H16 | 4.1363977189  | -2.4101873046 | 2.3733110409  |
| H17 | 4.6459829926  | -4.0992406891 | 2.1777165429  |
| C18 | 0.2040501738  | -2.6056383282 | 3.0343971051  |
| C19 | -0.9902627907 | -3.5644454242 | 2.9202695705  |
| H20 | -0.6730027706 | -4.6138152953 | 2.8769754921  |
| H21 | -1.6104889141 | -3.3630097843 | 2.0429684156  |
| H22 | -1.6301432663 | -3.4503769584 | 3.8049220701  |
| C23 | 1.0014391109  | -2.9607347804 | 4.3001725615  |
| H24 | 0.3431142435  | -2.8412356482 | 5.1701242001  |
| H25 | 1.8579816364  | -2.2964094237 | 4.4402696302  |
| H26 | 1.3532163597  | -3.9984221646 | 4.2985337453  |
| C27 | -0.1778684360 | -1.0825244569 | 3.0634209490  |
| H28 | -0.2117964255 | -0.7320862283 | 4.0984275122  |
| H29 | -1.1680645013 | -0.9268943941 | 2.6302892148  |
| H30 | 2.0221235425  | -0.2117416403 | 3.3387095606  |
| C31 | 2.3312694382  | 3.4136652731  | 1.3834163917  |
| C32 | 3.1069771091  | 2.7979263845  | 0.1976860860  |
| H33 | 3.8451996220  | 3.5301924220  | -0.1533255722 |

|     |               |               |               |
|-----|---------------|---------------|---------------|
| H34 | 2.4564624285  | 2.5550607346  | -0.6485617568 |
| H35 | 3.6315586032  | 1.8869476212  | 0.4853127789  |
| C36 | 3.3269269002  | 3.6121024799  | 2.5434276130  |
| H37 | 3.6858908725  | 2.6532375484  | 2.9303408339  |
| H38 | 2.8975993726  | 4.1799834072  | 3.3732212526  |
| H39 | 4.1978195320  | 4.1743679032  | 2.1832014312  |
| C40 | 1.7943347327  | 4.7831487229  | 0.9094960861  |
| H41 | 1.2859644997  | 5.3447830228  | 1.6917011011  |
| H42 | 1.1090259983  | 4.6850069827  | 0.0623130301  |
| H43 | 2.6399700061  | 5.3937957966  | 0.5686583654  |
| C44 | 0.0821524723  | 2.8394007933  | 3.5073940748  |
| C45 | 0.8865605253  | 2.3727056177  | 4.7390405361  |
| H46 | 0.3497455007  | 2.6639842662  | 5.6510909637  |
| H47 | 1.8813307141  | 2.8232666016  | 4.7852196939  |
| H48 | 1.0095971972  | 1.2876701584  | 4.7425028542  |
| C49 | -0.1079481706 | 4.3674540276  | 3.5744586122  |
| H50 | -0.6435702640 | 4.7607570734  | 2.7044934348  |
| H51 | 0.8353620740  | 4.9088107645  | 3.6758627485  |
| H52 | -0.7114069846 | 4.6069438472  | 4.4597001790  |
| C53 | -1.3234611631 | 2.2031128882  | 3.5808491050  |
| H54 | -1.2877513387 | 1.1161319862  | 3.5200751802  |
| H55 | -1.9857627012 | 2.5753684707  | 2.7932768113  |
| H56 | -1.7800019623 | 2.4714346381  | 4.5420027392  |
| C57 | -1.9468164718 | 1.1130031779  | -0.9819657213 |
| C58 | -1.0588601298 | 1.0468748826  | 0.2828359901  |
| C59 | -0.0509681904 | -0.1099313496 | 0.1674473369  |
| C60 | -0.7876238598 | -1.4488626259 | -0.0339897620 |
| C61 | -1.6283480686 | -1.4076939636 | -1.3271728178 |
| C62 | -2.6283205079 | -0.2367580591 | -1.2767153780 |
| H63 | -1.3170055161 | 1.3963300775  | -1.8387288219 |
| H64 | -2.7098050138 | 1.8978613824  | -0.8828428628 |
| H65 | -1.7176094657 | 0.8438256541  | 1.1390513430  |
| H66 | 0.5241936059  | 0.0638783075  | -0.7516759370 |
| H67 | -1.5044526707 | -1.5771977354 | 0.7870856657  |
| H68 | -0.9596715131 | -1.2901899588 | -2.1929055780 |
| H69 | -2.1714179222 | -2.3518464500 | -1.4737164440 |
| H70 | -3.3706644789 | -0.4409889103 | -0.4913223588 |
| H71 | -3.1882069375 | -0.1755374723 | -2.2185418394 |
| C72 | 0.1996951481  | -2.6280648975 | 0.0197290823  |
| H73 | -0.3073708341 | -3.6004373441 | 0.0107858619  |
| H74 | 0.8524191967  | -2.5906413809 | -0.8601407562 |
| C75 | -0.3321532955 | 2.3786461845  | 0.5413040625  |
| H76 | -1.0270012415 | 3.2020832211  | 0.7444678178  |
| H77 | 0.2257076137  | 2.6550282103  | -0.3617623314 |
| H78 | 2.3203588551  | 0.1577580513  | 0.4911847774  |

#### TS11-12

|     |              |               |               |
|-----|--------------|---------------|---------------|
| H1  | 0.4969643371 | 0.0068664513  | 2.2873392534  |
| Tr2 | 1.7968847787 | 0.3534490254  | 1.4091914398  |
| P3  | 1.9427177918 | -1.9730391640 | 1.0377306472  |
| P4  | 1.3679885112 | 2.6188111692  | 1.2215236006  |
| C5  | 3.6498034693 | -2.7290304188 | 0.5450276089  |
| C6  | 4.2031364871 | -1.8584571360 | -0.6041265104 |
| H7  | 4.2944720453 | -0.8123753903 | -0.3166848485 |
| H8  | 3.5772520692 | -1.9135140163 | -1.5005799427 |
| H9  | 5.2001935337 | -2.2260848577 | -0.8781302660 |
| C10 | 3.6150937523 | -4.1831961262 | 0.0280989640  |
| H11 | 4.6035712136 | -4.4324525942 | -0.3786367767 |
| H12 | 2.8930988498 | -4.3242037381 | -0.7823049590 |
| H13 | 3.3957443426 | -4.9117582910 | 0.8072587941  |
| C14 | 4.6166583493 | -2.6316251958 | 1.7414022982  |
| H15 | 4.3599260749 | -3.3388407976 | 2.5355141674  |
| H16 | 4.6254823527 | -1.6249669347 | 2.1700669154  |
| H17 | 5.6353801075 | -2.8706965522 | 1.4106074256  |
| C18 | 1.1200926433 | -3.0478213216 | 2.4253505960  |
| C19 | 1.2726278884 | -4.5709518572 | 2.2446025644  |
| H20 | 2.2883438796 | -4.9143891155 | 2.4540101209  |
| H21 | 0.9899404446 | -4.9088552602 | 1.2423705476  |
| H22 | 0.6117374687 | -5.0792919527 | 2.9584795213  |
| C23 | 1.7063827134 | -2.6395659602 | 3.7937810864  |
| H24 | 1.2027007305 | -3.2124638744 | 4.5833137357  |

|     |               |               |               |
|-----|---------------|---------------|---------------|
| H25 | 1.5569340417  | -1.5750880890 | 3.9843009655  |
| H26 | 2.7767112884  | -2.8477915163 | 3.8704521521  |
| C27 | -0.3951462191 | -2.7376206498 | 2.4499677109  |
| H28 | -0.8201770566 | -3.1578531631 | 3.3696515996  |
| H29 | -0.9283068611 | -3.1984289909 | 1.6129388706  |
| H30 | -0.5968267541 | -1.6643327718 | 2.4450399807  |
| C31 | 3.0623522454  | 2.9628257807  | 0.4356165117  |
| C32 | 3.3667243209  | 1.4837690378  | 0.0404865444  |
| H33 | 4.4487239323  | 1.3083545791  | 0.0524901022  |
| H34 | 3.0120521463  | 1.2279431075  | -0.9564992798 |
| H35 | 3.3921024756  | 0.6498022485  | 1.4683006405  |
| C36 | 4.1004637785  | 3.4241956513  | 1.4737105479  |
| H37 | 4.1291142282  | 2.7618283684  | 2.3428283342  |
| H38 | 3.9192546838  | 4.4474088061  | 1.8175845091  |
| H39 | 5.0945420164  | 3.4088374256  | 1.0084083895  |
| C40 | 3.0897427109  | 3.9257564063  | -0.7607121297 |
| H41 | 2.8590780116  | 4.9543939716  | -0.4587247533 |
| H42 | 2.3866309665  | 3.6372997877  | -1.5462870370 |
| H43 | 4.0937494622  | 3.9305133416  | -1.2043240155 |
| C44 | 0.8025101632  | 3.8357907227  | 2.5685968589  |
| C45 | 1.6729590141  | 3.6606273709  | 3.8295413990  |
| H46 | 1.2461527378  | 4.2559251874  | 4.6463584105  |
| H47 | 2.6999866680  | 3.9985448463  | 3.6799543733  |
| H48 | 1.7024405513  | 2.6137176929  | 4.1445847542  |
| C49 | 0.8557544327  | 5.2937955995  | 2.0730297623  |
| H50 | 0.2334676702  | 5.4490645180  | 1.1853726885  |
| H51 | 1.8759220032  | 5.6084283171  | 1.8316811124  |
| H52 | 0.4822971652  | 5.9658285756  | 2.8566083080  |
| C53 | -0.6495268311 | 3.4631353352  | 2.9432015771  |
| H54 | -0.7392074472 | 2.4006824474  | 3.1921901999  |
| H55 | -1.3603651982 | 3.6924789118  | 2.1442831371  |
| H56 | -0.9519056787 | 4.0421706900  | 3.8242663450  |
| C57 | -0.3853440766 | -1.0465068974 | -2.3523030415 |
| C58 | 0.7031389135  | -0.9263958350 | -1.2601429765 |
| C59 | 0.4002844905  | 0.2440274112  | -0.3062888937 |
| C60 | 0.2774179515  | 1.5600279762  | -1.1030953465 |
| C61 | -0.8426541944 | 1.4645418366  | -2.1600693180 |
| C62 | -0.5868726688 | 0.2791262008  | -3.1089164390 |
| H63 | -1.3318115795 | -1.3370233895 | -1.8718704216 |
| H64 | -0.1395034068 | -1.8458151885 | -3.0657398125 |
| H65 | 1.6555611699  | -0.7081459506 | -1.7683109492 |
| H66 | -0.5888770673 | 0.0533845948  | 0.1388836511  |
| H67 | 1.2102967490  | 1.7114366294  | -1.6656764847 |
| H68 | -1.8086878069 | 1.3309781183  | -1.6506492189 |
| H69 | -0.9181624684 | 2.3947614368  | -2.7409014336 |
| H70 | 0.3127716327  | 0.4912711651  | -3.7053337759 |
| H71 | -1.4127135859 | 0.1813500153  | -3.8250154108 |
| C72 | 0.1060705242  | 2.7572641472  | -0.1503349957 |
| H73 | 0.1540513691  | 3.7222436125  | -0.6689739723 |
| H74 | -0.8786818523 | 2.6925720717  | 0.3264753358  |
| C75 | 0.8714019069  | -2.2458612030 | -0.4838478637 |
| H76 | 1.2679281299  | -3.0439201079 | -1.1205928394 |
| H77 | -0.1113179045 | -2.5822857938 | -0.1398558131 |
| H78 | 2.3952407578  | 0.3495112644  | 2.9406995024  |

## 12

|     |              |               |               |
|-----|--------------|---------------|---------------|
| H1  | 1.6588523795 | 0.0022043654  | 3.1614052002  |
| Ir2 | 1.5810009707 | 0.0022043610  | 1.5928526751  |
| P3  | 1.3632349687 | -2.3158003726 | 1.4140410198  |
| P4  | 1.3661977502 | 2.3202000272  | 1.4136379405  |
| C5  | 2.9152770200 | -3.2639749276 | 0.7938686564  |
| C6  | 3.5690100160 | -2.3414854914 | -0.2606659219 |
| H7  | 3.8301448233 | -1.3724265554 | 0.1740573563  |
| H8  | 2.9138325406 | -2.1602375395 | -1.1190632922 |
| H9  | 4.4835951587 | -2.8159994567 | -0.6394214653 |
| C10 | 2.6106966446 | -4.6234335945 | 0.1319546090  |
| H11 | 3.5436917485 | -5.0436618843 | -0.2654719238 |
| H12 | 1.9163300842 | -4.5311523648 | -0.7083358224 |
| H13 | 2.1984928850 | -5.3530523074 | 0.8311379253  |
| C14 | 3.9238830911 | -3.4624920922 | 1.9415519258  |
| H15 | 3.5905544267 | -4.2165530804 | 2.6604743774  |

|     |               |               |               |
|-----|---------------|---------------|---------------|
| H16 | 4.1114830649  | -2.5273810196 | 2.4775785162  |
| H17 | 4.8786190335  | -3.8110635253 | 1.5276412285  |
| C18 | 0.5694326379  | -3.2028136676 | 2.9199924181  |
| C19 | 0.4295090251  | -4.7275874914 | 2.7553885790  |
| H20 | 1.3969570290  | -5.2360766146 | 2.7827293104  |
| H21 | -0.0791498483 | -5.0054018216 | 1.8264892142  |
| H22 | -0.1680143341 | -5.1268063680 | 3.5854215815  |
| C23 | 1.3765983713  | -2.8980084490 | 4.1992361578  |
| H24 | 0.8518163175  | -3.3262177471 | 5.0629166744  |
| H25 | 1.4756591083  | -1.8217588756 | 4.3570986877  |
| H26 | 2.3796484036  | -3.3292581308 | 4.1784055194  |
| C27 | -0.8387779623 | -2.5912863231 | 3.0944302514  |
| H28 | -1.2791615977 | -2.9670830516 | 4.0265709831  |
| H29 | -1.5140447132 | -2.8668860874 | 2.2790090446  |
| H30 | -0.7925858504 | -1.4996192649 | 3.1527318796  |
| C31 | 2.9222251327  | 3.2675686444  | 0.8029888034  |
| C32 | 3.5827039933  | 2.3431865451  | -0.2457682439 |
| H33 | 4.4992754937  | 2.8172895144  | -0.6201703300 |
| H34 | 2.9326191100  | 2.1597722452  | -1.1075980400 |
| H35 | 3.8415998393  | 1.3751312862  | 0.1925282063  |
| C36 | 3.9234675272  | 3.4674826804  | 1.9568012492  |
| H37 | 4.1077615230  | 2.5329810598  | 2.4950799486  |
| H38 | 3.5854277606  | 4.2223269422  | 2.6726756925  |
| H39 | 4.8808161243  | 3.8155769127  | 1.5485823921  |
| C40 | 2.6215682438  | 4.6260970941  | 0.1372877348  |
| H41 | 2.2027461333  | 5.3558849140  | 0.8324214033  |
| H42 | 1.9342032122  | 4.5321402302  | -0.7085118339 |
| H43 | 3.5572767259  | 5.0469264277  | -0.2530692476 |
| C44 | 0.5620494468  | 3.2052123323  | 2.9157978418  |
| C45 | 1.3634153319  | 2.9031959771  | 4.1992992561  |
| H46 | 0.8327030373  | 3.3296048772  | 5.0602488344  |
| H47 | 2.3651644149  | 3.3375869572  | 4.1837304240  |
| H48 | 1.4649609200  | 1.8272419360  | 4.3576888783  |
| C49 | 0.4176204704  | 4.7294016688  | 2.7498078924  |
| H50 | -0.0882458433 | 5.0047224403  | 1.8186544406  |
| H51 | 1.3831096638  | 5.2413968199  | 2.7807533713  |
| H52 | -0.1849165952 | 5.1270215351  | 3.5770024449  |
| C53 | -0.8450286155 | 2.5893808136  | 3.0844125827  |
| H54 | -0.7960490342 | 1.4977234022  | 3.1409210705  |
| H55 | -1.5184233789 | 2.8646725893  | 2.2674524128  |
| H56 | -1.2895444172 | 2.9622777251  | 4.0157795537  |
| C57 | -1.5156142206 | 1.2833324744  | -1.4819673598 |
| C58 | -0.7103491844 | 1.2771751613  | -0.1642361725 |
| C59 | 0.1554281622  | 0.0033151530  | -0.0387632241 |
| C60 | -0.7175436781 | -1.2661281526 | -0.1556179583 |
| C61 | -1.5268322131 | -1.2720144171 | -1.4706048343 |
| C62 | -2.3667647811 | 0.0087243637  | -1.6193323305 |
| H63 | -0.8137724427 | 1.3475904183  | -2.3276724726 |
| H64 | -2.1628178232 | 2.1697527134  | -1.5434895469 |
| H65 | -1.4415486660 | 1.2568067691  | 0.6565008716  |
| H66 | 0.8543211824  | -0.0013989110 | -0.9050632791 |
| H67 | -1.4449665210 | -1.2397449632 | 0.6684186949  |
| H68 | -0.8273817515 | -1.3497679673 | -2.3172193139 |
| H69 | -2.1823695909 | -2.1528537528 | -1.5248676058 |
| H70 | -3.1479583457 | 0.0157461202  | -0.8449590198 |
| H71 | -2.8911820327 | 0.0059970163  | -2.5834703185 |
| C72 | 0.1365282066  | -2.5367603586 | 0.0046651009  |
| H73 | -0.4748040604 | -3.4398367309 | 0.1183831621  |
| H74 | 0.7317330614  | -2.6778375253 | -0.9058550626 |
| C75 | 0.1493972577  | 2.5432770724  | -0.0036464757 |
| H76 | -0.4576578490 | 3.4500458467  | 0.1030381134  |
| H77 | 0.7508549869  | 2.6774535352  | -0.9111022225 |
| H78 | 3.0589364078  | 0.0008006672  | 2.2593812893  |

7

|     |              |               |               |
|-----|--------------|---------------|---------------|
| H1  | 2.6514796000 | -0.0065106337 | 0.4770764011  |
| Ir2 | 1.5316526273 | -0.0012617650 | 1.6723703374  |
| P3  | 1.3681233426 | -2.3399664660 | 1.4477549205  |
| P4  | 1.3763068428 | 2.3368898644  | 1.4382446267  |
| C5  | 2.9794070016 | -3.2304877592 | 0.8504052218  |
| C6  | 3.3238165197 | -2.7168202163 | -0.5672115656 |

|     |               |                |               |
|-----|---------------|----------------|---------------|
| H7  | 3.2882965493  | -1.6269047034  | -0.6279675168 |
| H8  | 2.6637096079  | -3.1328156933  | -1.3342046056 |
| H9  | 4.3429986137  | -3.0373256223  | -0.8149685187 |
| C10 | 2.8680568065  | -4.7659019088  | 0.7714254074  |
| H11 | 3.7658809063  | -5.1611136398  | 0.2789206369  |
| H12 | 2.0050057304  | -5.09314445822 | 0.1823822040  |
| H13 | 2.8139041438  | -5.2332871190  | 1.7576809921  |
| C14 | 4.1523491318  | -2.8499665884  | 1.7791997684  |
| H15 | 4.0060184101  | -3.1875050379  | 2.8074088445  |
| H16 | 4.3034673755  | -1.7690418547  | 1.7966494151  |
| H17 | 5.0697140766  | -3.3220726428  | 1.4048894147  |
| C18 | 0.5816392745  | -3.3229170958  | 2.9141836149  |
| C19 | 0.0439076914  | -4.7189783642  | 2.5308305372  |
| H20 | 0.8103649151  | -5.3944981097  | 2.1535791942  |
| H21 | -0.7566506106 | -4.6628724941  | 1.7874617783  |
| H22 | -0.3872406783 | -5.1834931631  | 3.4265653695  |
| C23 | 1.6084117348  | -3.4616166052  | 4.0561640920  |
| H24 | 1.1015886375  | -3.8353502199  | 4.9547621544  |
| H25 | 2.0644430582  | -2.4986874362  | 4.3053147717  |
| H26 | 2.4042511067  | -4.1722875127  | 3.8163905770  |
| C27 | -0.6177246992 | -2.5095389208  | 3.4486052237  |
| H28 | -1.0870311712 | -3.0759555182  | 4.2633341968  |
| H29 | -1.3797362089 | -2.3429943026  | 2.6809422044  |
| H30 | -0.3093107309 | -1.5371394171  | 3.8321413756  |
| C31 | 2.9886037292  | 3.2173037256   | 0.8289295712  |
| C32 | 3.3238882534  | 2.6946290990   | -0.5875453343 |
| H33 | 4.3434065519  | 3.0089279197   | -0.8417926528 |
| H34 | 2.6621929265  | 3.1098575773   | -1.3535702119 |
| H35 | 3.2829182225  | 1.6046048690   | -0.6425302358 |
| C36 | 4.1640542570  | 2.8367916407   | 1.7545355128  |
| H37 | 4.3114252453  | 1.7554379422   | 1.7764886719  |
| H38 | 4.0230860675  | 3.1795833028   | 2.7817786388  |
| H39 | 5.0815666737  | 3.3039096696   | 1.3743420201  |
| C40 | 2.8837658269  | 4.7528028993   | 0.7423197273  |
| H41 | 2.8400263911  | 5.2256590781   | 1.7264947443  |
| H42 | 2.0175291329  | 5.0811808034   | 0.1585774440  |
| H43 | 3.7794683681  | 5.1410158182   | 0.2404910479  |
| C44 | 0.6007810097  | 3.3284140931   | 2.9043812305  |
| C45 | 1.6301305805  | 3.4577197459   | 4.0450486512  |
| H46 | 1.1280277519  | 3.8358603286   | 4.9444575605  |
| H47 | 2.4318314532  | 4.1613512688   | 3.8040343097  |
| H48 | 2.0780192034  | 2.4907591636   | 4.2932752920  |
| C49 | 0.0757273725  | 4.7294363439   | 2.5217260784  |
| H50 | -0.7216079219 | 4.6817995568   | 1.7743023848  |
| H51 | 0.8494305856  | 5.3998074093   | 2.1502442510  |
| H52 | -0.3562091761 | 5.1950495900   | 3.4165171543  |
| C53 | -0.6058241991 | 2.5260617812   | 3.4392563473  |
| H54 | -0.3064300824 | 1.5504362576   | 3.8216902666  |
| H55 | -1.3699831175 | 2.3675039147   | 2.6719377761  |
| H56 | -1.0692074632 | 3.0961832797   | 4.2547870466  |
| C57 | -1.5440215288 | 1.2778037825   | -1.4179333160 |
| C58 | -0.6886551447 | 1.2600044110   | -0.1322760884 |
| C59 | 0.1928608620  | -0.0018925500  | -0.0842678601 |
| C60 | -0.6899172648 | -1.2629587526  | -0.1303087148 |
| C61 | -1.5450041975 | -1.2821230575  | -1.4160947156 |
| C62 | -2.3920967523 | -0.0019234408  | -1.5392988294 |
| H63 | -0.8776007754 | 1.3616870698   | -2.2896178342 |
| H64 | -2.1991390424 | 2.1599661834   | -1.4388680023 |
| H65 | -1.3809378257 | 1.2090766076   | 0.7213130110  |
| H66 | 0.8169628668  | -0.0030249097  | -0.9891655865 |
| H67 | -1.3824802597 | -1.2099685895  | 0.7228988876  |
| H68 | -0.8785321448 | -1.3677445517  | -2.2875696160 |
| H69 | -2.2008559888 | -2.1637642295  | -1.4359487874 |
| H70 | -3.1526275860 | -0.0011499154  | -0.7449082790 |
| H71 | -2.9410847203 | -0.0023660178  | -2.4895432078 |
| C72 | 0.1557140207  | -2.5391369471  | 0.0248405268  |
| H73 | -0.4678993694 | -3.4314342232  | 0.1373659090  |
| H74 | 0.7459747251  | -2.6838278837  | -0.8852123769 |
| C75 | 0.1575151557  | 2.5362221242   | 0.0205075708  |
| H76 | -0.4663331153 | 3.4278366398   | 0.1374359781  |
| H77 | 0.7430803600  | 2.6830543847   | -0.8922110598 |

|     |              |               |              |
|-----|--------------|---------------|--------------|
| H78 | 3.0293684774 | -0.0016633510 | 2.3019947247 |
| H79 | 1.5914720949 | 0.0007330644  | 3.2955570212 |
| H80 | 0.0211480086 | 0.0031037177  | 2.2870695543 |

**TS8-22**

|     |               |               |               |
|-----|---------------|---------------|---------------|
| H1  | 2.4695408247  | -0.1061976041 | 2.6930027529  |
| Ir2 | 1.5481936944  | 0.0317753445  | 1.3274793715  |
| P3  | 1.3925573904  | 2.3361247955  | 1.0600965553  |
| P4  | 1.6061719766  | -2.1733170119 | 0.7367754412  |
| C5  | 1.9953185322  | 3.6543801785  | 2.2947686729  |
| C6  | 1.1359468781  | 3.4404550158  | 3.5620651760  |
| H7  | 1.1384466274  | 2.3908332515  | 3.8729200123  |
| H8  | 0.0992163955  | 3.7604748142  | 3.4167727209  |
| H9  | 1.5531302476  | 4.0392635360  | 4.3810630316  |
| C10 | 1.8626309172  | 5.1165323856  | 1.8342535271  |
| H11 | 2.0883239700  | 5.7835117815  | 2.6765721122  |
| H12 | 0.8515468218  | 5.3567469777  | 1.4890964221  |
| H13 | 2.5670600644  | 5.3613025590  | 1.0343549521  |
| C14 | 3.4636755565  | 3.3421210690  | 2.6540587067  |
| H15 | 4.1415813935  | 3.5071581912  | 1.8119408377  |
| H16 | 3.5727047547  | 2.3044311598  | 2.9816132735  |
| H17 | 3.7846326016  | 4.0026092496  | 3.4697645853  |
| C18 | 1.9378014277  | 2.6724135172  | -0.7996771803 |
| C19 | 1.4103819433  | 4.0042889853  | -1.3745013226 |
| H20 | 1.7951234105  | 4.8739143335  | -0.8379335065 |
| H21 | 0.3176581163  | 4.0559643468  | -1.3656550212 |
| H22 | 1.7293173701  | 4.0976398646  | -2.4199550802 |
| C23 | 3.4777608251  | 2.6577357081  | -0.8697269702 |
| H24 | 3.8036520891  | 2.7072570858  | -1.9160494539 |
| H25 | 3.8853962580  | 1.7448029563  | -0.4245873534 |
| H26 | 3.9170197652  | 3.5156537686  | -0.3504042059 |
| C27 | 1.3583763918  | 1.5112860868  | -1.6293780495 |
| H28 | 2.1109114271  | 0.9138201604  | -2.1496627987 |
| H29 | 0.5353460333  | 1.7750746185  | -2.2906109073 |
| H30 | 1.3117724977  | 0.4827127871  | -0.4784081222 |
| C31 | 0.7434811669  | -3.5002308613 | 1.8618264558  |
| C32 | -0.3061107061 | -2.7454115888 | 2.7079655616  |
| H33 | -0.7900750417 | -3.4507154551 | 3.3969892035  |
| H34 | -1.0896516368 | -2.2873131091 | 2.1016707040  |
| H35 | 0.1634280730  | -1.9468939036 | 3.2889537907  |
| C36 | 1.7384205881  | -4.1224609756 | 2.8627456361  |
| H37 | 2.2779947610  | -3.3554656101 | 3.4254029421  |
| H38 | 2.4647338616  | -4.7847417843 | 2.3859279041  |
| H39 | 1.1765619228  | -4.7277019211 | 3.5858707811  |
| C40 | 0.0522017181  | -4.6274381504 | 1.0710219717  |
| H41 | 0.7442804742  | -5.1710328890 | 0.4209903076  |
| H42 | -0.7700278875 | -4.2545451336 | 0.4535853070  |
| H43 | -0.3774578699 | -5.3544248391 | 1.7727786819  |
| C44 | 3.3519332748  | -2.8127504117 | 0.1990196756  |
| C45 | 4.3297237794  | -2.7390542927 | 1.3930557418  |
| H46 | 5.3495532882  | -2.9213598006 | 1.0305423742  |
| H47 | 4.1241327821  | -3.4810644041 | 2.1641209571  |
| H48 | 4.2976115605  | -1.7480313429 | 1.8543148804  |
| C49 | 3.3307711467  | -4.2304235809 | -0.4022438153 |
| H50 | 2.6502579130  | -4.3042084340 | -1.2578562862 |
| H51 | 3.0414125497  | -4.9919268120 | 0.3268198035  |
| H52 | 4.3343430117  | -4.4924631681 | -0.7628656184 |
| C53 | 3.9013694474  | -1.8298741231 | -0.8622531336 |
| H54 | 3.8363389487  | -0.7978437536 | -0.5044652523 |
| H55 | 3.3847152764  | -1.8983502192 | -1.8244104673 |
| H56 | 4.9556871183  | -2.0670834403 | -1.0509491523 |
| C57 | -1.7518419165 | -1.4403494193 | -0.6137911138 |
| C58 | -0.3334906498 | -0.9800789241 | -1.0372991872 |
| C59 | 0.1225943500  | 0.2559005394  | -0.2360791338 |
| C60 | -0.9279750335 | 1.3798901935  | -0.0741522667 |
| C61 | -2.2524963326 | 0.7794465858  | 0.4409949870  |
| C62 | -2.7690046460 | -0.3015029189 | -0.5118229528 |
| H63 | -1.6919681937 | -1.9374461020 | 0.3588101460  |
| H64 | -2.0904221616 | -2.2000264682 | -1.3298247800 |
| H65 | -0.4109455829 | -0.7058978341 | -2.1016026472 |
| H66 | -1.1692234234 | 1.8085234387  | -1.0581384300 |

|     |               |               |               |
|-----|---------------|---------------|---------------|
| H67 | -2.0916607071 | 0.3546217202  | 1.4405524480  |
| H68 | -2.9854747443 | 1.5897268228  | 0.5467012977  |
| H69 | -2.9472592404 | 0.1380315970  | -1.5041211958 |
| H70 | -3.7336894747 | -0.6932180100 | -0.1665435245 |
| C71 | -0.4451149242 | 2.5305250496  | 0.8567688150  |
| H72 | -0.7601602971 | 3.5098124902  | 0.4792426825  |
| H73 | -0.8882116607 | 2.4041806289  | 1.8487901870  |
| C74 | 0.6772365937  | -2.1508517667 | -0.9238634282 |
| H75 | 1.4552191456  | -2.0188480496 | -1.6788086065 |
| H76 | 0.1902559677  | -3.1031911466 | -1.1547502047 |

**TS9-22**

|     |               |               |               |
|-----|---------------|---------------|---------------|
| Ir1 | 1.4774729792  | 0.8396269345  | 0.8719705464  |
| P2  | 1.1717079659  | 3.1473005855  | 0.6085437363  |
| P3  | 1.3611612835  | -1.4283060374 | 1.0082651931  |
| C4  | 0.4263806360  | 4.0685140507  | 2.1312762205  |
| C5  | -0.9333518687 | 3.3888817505  | 2.4168971027  |
| H6  | -0.8360611000 | 2.3025730703  | 2.4815377872  |
| H7  | -1.6764683880 | 3.6130101674  | 1.6449598779  |
| H8  | -1.3291311962 | 3.7622896325  | 3.3699281064  |
| C9  | 0.1781594768  | 5.5764455416  | 1.9389776761  |
| H10 | -0.4248378673 | 5.9522195414  | 2.7762305849  |
| H11 | -0.3695867441 | 5.8010609067  | 1.0180337014  |
| H12 | 1.1083523924  | 6.1499124262  | 1.9336275563  |
| C13 | 1.3349879277  | 3.8620202867  | 3.3602717215  |
| H14 | 2.2956384394  | 4.3725591143  | 3.2580956530  |
| H15 | 1.5342639332  | 2.8037147991  | 3.5378405210  |
| H16 | 0.8401228535  | 4.2695827368  | 4.2512805276  |
| C17 | 2.6037338482  | 4.1758384011  | -0.1746794515 |
| C18 | 2.1815023346  | 5.5588149846  | -0.7136071027 |
| H19 | 1.8984421144  | 6.2565125959  | 0.0747677908  |
| H20 | 1.3516397408  | 5.4957205584  | -1.4243566067 |
| H21 | 3.0297122413  | 6.0034920810  | -1.2503362569 |
| C22 | 3.7436766839  | 4.3461360376  | 0.8469117250  |
| H23 | 4.6274080602  | 4.7585183562  | 0.3438047649  |
| H24 | 4.0251314627  | 3.3866657984  | 1.2911089514  |
| H25 | 3.4777888868  | 5.0393246099  | 1.6501018656  |
| C26 | 3.1444987528  | 3.3521194186  | -1.3647444677 |
| H27 | 3.9852977429  | 3.8948788916  | -1.8163351716 |
| H28 | 2.3910388327  | 3.2057283031  | -2.1453873441 |
| H29 | 3.4876532783  | 2.3668352320  | -1.0455222431 |
| C30 | 1.3366272334  | -1.3893126263 | 2.9335065598  |
| C31 | 1.3195617115  | 0.1633169016  | 3.1196709309  |
| C32 | 2.5988668021  | -1.9648974055 | 3.5964010567  |
| H33 | 3.5053765362  | -1.4684186920 | 3.2422679453  |
| H34 | 2.7051697095  | -3.0425006235 | 3.4398700258  |
| H35 | 2.5339259860  | -1.7968929458 | 4.6792909071  |
| C36 | 0.0965237060  | -2.0315804952 | 3.5728138493  |
| H37 | 0.0553240663  | -3.1115681764 | 3.3868040104  |
| H38 | -0.8338157785 | -1.5857023431 | 3.2085364562  |
| H39 | 0.1230705921  | -1.8825177899 | 4.6597344049  |
| C40 | 2.5332380185  | -2.7191350446 | 0.2287354150  |
| C41 | 3.9995583924  | -2.4265551511 | 0.6032379683  |
| H42 | 4.6589696323  | -3.0278565785 | -0.0349589673 |
| H43 | 4.2281278317  | -2.6848002466 | 1.6383110201  |
| H44 | 4.2421464237  | -1.3711877880 | 0.4468986699  |
| C45 | 2.1468805546  | -4.1553947982 | 0.6323937260  |
| H46 | 1.1185966797  | -4.4023746724 | 0.3476738709  |
| H47 | 2.2485451617  | -4.3244044947 | 1.7086948880  |
| H48 | 2.8054225790  | -4.8721320802 | 0.1249063748  |
| C49 | 2.4038998309  | -2.5560103694 | -1.3013413354 |
| H50 | 2.6199536214  | -1.5282018569 | -1.6083157492 |
| H51 | 1.4106111339  | -2.8240340564 | -1.6705817092 |
| H52 | 3.1256082038  | -3.2195292389 | -1.7935896069 |
| C53 | -0.1720490666 | 3.2528659222  | -0.6928171746 |
| H54 | 0.3037763636  | 3.6103061548  | -1.6111737872 |
| H55 | -0.9193038136 | 4.0091700196  | -0.4300461206 |
| C56 | -0.3389956050 | -1.8096094488 | 0.3137719795  |
| H57 | -0.3330635726 | -2.7411626687 | -0.2612195589 |
| H58 | -1.0143452411 | -1.9776149569 | 1.1564047223  |
| H59 | 2.4442626102  | 0.7912534846  | 2.2809530853  |

|     |               |               |               |
|-----|---------------|---------------|---------------|
| H60 | 1.9395537416  | 0.4550602219  | 3.9754732058  |
| H61 | 0.3174274317  | 0.5435146141  | 3.3129151855  |
| H62 | 3.0742632597  | 0.8879334748  | 0.4842892844  |
| C63 | -0.1247619318 | 0.7166834885  | -0.2319680618 |
| C64 | -0.9094064111 | 1.6008381029  | -2.4779740931 |
| C65 | -0.8230276363 | 1.8739703816  | -0.9509870544 |
| C66 | -0.8459799665 | -0.6102878572 | -0.5360264474 |
| C67 | -0.8843568398 | -0.8983807710 | -2.0571888551 |
| C68 | -1.5693301838 | 0.2550832617  | -2.8022671533 |
| H69 | 0.1132090779  | 1.6103091749  | -2.8808169901 |
| H70 | -1.4541173182 | 2.4178297308  | -2.9704669762 |
| H71 | -1.8635503950 | 1.9092872598  | -0.5799686731 |
| H72 | -1.9002882658 | -0.4520553880 | -0.2452983283 |
| H73 | 0.1401562860  | -1.0194632123 | -2.4302910545 |
| H74 | -1.4141989830 | -1.8408966379 | -2.2530503940 |
| H75 | -2.6304903258 | 0.2901191305  | -2.5146004449 |
| H76 | -1.5482551360 | 0.0763844861  | -3.8848685849 |

## 22

|     |               |                |               |
|-----|---------------|----------------|---------------|
| H1  | 3.1805990990  | 0.0014301603   | 1.6074823695  |
| Ir2 | 1.5456763707  | 0.0007133316   | 1.1208971889  |
| P3  | 1.4418004880  | 2.3042488901   | 0.9599011448  |
| P4  | 1.4419508257  | -2.3031231007  | 0.9622379986  |
| C5  | 1.3583903197  | 3.2969406147   | 2.5993512140  |
| C6  | 0.5034492767  | 2.4425564512   | 3.5626467541  |
| H7  | 0.9376100552  | 1.4488431374   | 3.7028896791  |
| H8  | -0.5206082216 | 2.3066011136   | 3.2009329600  |
| H9  | 0.4477025431  | 2.9443026531   | 4.5376121668  |
| C10 | 0.7059187944  | 4.6887226175   | 2.4733491537  |
| H11 | 0.6294673211  | 5.1393679918   | 3.4713425188  |
| H12 | -0.3085904168 | 4.6368996132   | 2.0664483532  |
| H13 | 1.2839879903  | 5.3739355850   | 1.8510443430  |
| C14 | 2.7672732788  | 3.4379528312   | 3.2079314346  |
| H15 | 3.3911196858  | 4.1411748572   | 2.6487715352  |
| H16 | 3.2848638366  | 2.4750692566   | 3.2511479949  |
| H17 | 2.6824894030  | 3.8236473588   | 4.2318035153  |
| C18 | 2.6793403138  | 3.1022320880   | -0.2734242944 |
| C19 | 2.5702845036  | 4.6340544049   | -0.3846766010 |
| H20 | 2.9189309107  | 5.1394285279   | 0.5199485662  |
| H21 | 1.5485291445  | 4.9689695520   | -0.5933643291 |
| H22 | 3.2020543985  | 4.9829743030   | -1.2121151804 |
| C23 | 4.1234711688  | 2.7086247510   | 0.1006664813  |
| H24 | 4.8066143702  | 3.0643323226   | -0.6818394899 |
| H25 | 4.2221701679  | 1.6241322399   | 0.1882807572  |
| H26 | 4.4480537294  | 3.1511077826   | 1.0451843089  |
| C27 | 2.3692822086  | 2.4812526903   | -1.6542000851 |
| H28 | 3.1325720158  | 2.8049064128   | -2.3728628634 |
| H29 | 1.3974687090  | 2.7988211862   | -2.0454833331 |
| H30 | 2.3848495794  | 1.3882952987   | -1.6063155363 |
| C31 | 1.3732211590  | -3.2988573542  | 2.6013645337  |
| C32 | 0.5308124885  | -2.4422299462  | 3.5740890025  |
| H33 | 0.4816566197  | -2.9448785958  | 4.5489518381  |
| H34 | -0.4958660750 | -2.3009553004  | 3.2218798857  |
| H35 | 0.9708376974  | -1.4506967086  | 3.7117884601  |
| C36 | 2.7877249856  | -3.44444410242 | 3.1958476462  |
| H37 | 3.3075574127  | -2.4826030992  | 3.2363400079  |
| H38 | 3.4048625646  | -4.1476989694  | 2.6293734971  |
| H39 | 2.7118196957  | -3.8319299235  | 4.2197567540  |
| C40 | 0.7144560557  | -4.6878759195  | 2.4801934167  |
| H41 | 1.2828305317  | -5.3740326697  | 1.8500212946  |
| H42 | -0.3044399787 | -4.6311954454  | 2.0850090010  |
| H43 | 0.6476829516  | -5.1398591083  | 3.4782677887  |
| C44 | 2.6714580999  | -3.0992110144  | -0.2801885107 |
| C45 | 4.1169647825  | -2.6999689896  | 0.0822414737  |
| H46 | 4.7956519532  | -3.0560441954  | -0.7039202798 |
| H47 | 4.4496376171  | -3.1381269278  | 1.0259409485  |
| H48 | 4.2126043926  | -1.6148501836  | 0.1656421087  |
| C49 | 2.5659967856  | -4.6315173316  | -0.3870645604 |
| H50 | 1.5437557124  | -4.9693875031  | -0.5886326550 |
| H51 | 2.9214204643  | -5.1338308676  | 0.5166222790  |
| H52 | 3.1935024091  | -4.9807503045  | -1.2175909784 |



|     |               |               |               |
|-----|---------------|---------------|---------------|
| C53 | 2.3491842480  | -2.4826480040 | -1.6601155336 |
| H54 | 2.3619041710  | -1.3895234647 | -1.6151594206 |
| H55 | 1.3754558639  | -2.8042064693 | -2.0432179656 |
| H56 | 3.1080502554  | -2.8058133436 | -2.3836529781 |
| C57 | -2.2748079169 | -1.2489847481 | -0.5455216308 |
| C58 | -0.7267424738 | -1.2745623308 | -0.4949945137 |
| C59 | -0.1085944245 | 0.0003089995  | 0.1067329157  |
| C60 | -0.7225483298 | 1.2734549297  | -0.5030466853 |
| C61 | -2.2706511547 | 1.2526344830  | -0.5567103355 |
| C62 | -2.8105365869 | -0.0003554181 | -1.2475533271 |
| H63 | -2.6601624163 | -1.2780627846 | 0.4840368996  |
| H64 | -2.6360684743 | -2.1603739176 | -1.0390124230 |
| H65 | -0.3813523152 | -1.3004066186 | -1.5438569171 |
| H66 | -0.3744522455 | 1.2924096044  | -1.5512202924 |
| H67 | -2.6576932027 | 1.2929489716  | 0.4718325517  |
| H68 | -2.6275471734 | 2.1608174370  | -1.0592690805 |
| H69 | -2.5041538184 | -0.0056314662 | -2.3035503969 |
| H70 | -3.9077089172 | 0.0017198715  | -1.2404427995 |
| C71 | -0.2411570019 | 2.5650087171  | 0.1925913017  |
| H72 | -0.2792489122 | 3.4279188119  | -0.4818913572 |
| H73 | -0.9238046429 | 2.7866155763  | 1.0203359767  |
| C74 | -0.2466736702 | -2.5632446587 | 0.2069477785  |
| H75 | -0.2927188117 | -3.4308578500 | -0.4610184837 |
| H76 | -0.9247923008 | -2.7755668488 | 1.0409389866  |

### 23

|     |               |               |               |
|-----|---------------|---------------|---------------|
| H1  | 1.0514030040  | 0.0006851737  | 2.7049614234  |
| Ir2 | 1.5942459235  | 0.0003878121  | 1.1772682273  |
| P3  | 1.4847166776  | 2.3272137891  | 1.0144765086  |
| P4  | 1.4855540657  | -2.3263585405 | 1.0150586106  |
| C5  | 1.4016850566  | 3.3997781760  | 2.6120223398  |
| C6  | 0.5525469473  | 2.6358883304  | 3.6509529421  |
| H7  | 1.0242774602  | 1.6961378715  | 3.9395038898  |
| H8  | -0.4516831938 | 2.4025596813  | 3.2833194958  |
| H9  | 0.4422528759  | 3.2647255133  | 4.5435960668  |
| C10 | 0.7394079460  | 4.7780980035  | 2.3927594825  |
| H11 | 0.6859652855  | 5.2999495019  | 3.3566093253  |
| H12 | -0.2858045570 | 4.6890651599  | 2.0206277972  |
| H13 | 1.2929487693  | 5.4198693104  | 1.7076465640  |
| C14 | 2.8148138109  | 3.5847925313  | 3.1991162112  |
| H15 | 3.4320676148  | 4.2561265254  | 2.5956046026  |
| H16 | 3.3346415038  | 2.6269124227  | 3.2971407669  |
| H17 | 2.7360596051  | 4.0292436024  | 4.1992950090  |
| C18 | 2.7164529035  | 3.1150171178  | -0.2425440214 |
| C19 | 2.6135516842  | 4.6473835120  | -0.3709718334 |
| H20 | 2.9765150473  | 5.1676342662  | 0.5188036107  |
| H21 | 1.5930463331  | 4.9859294242  | -0.5787935637 |
| H22 | 3.2396949764  | 4.9747562970  | -1.2110507717 |
| C23 | 4.1659841517  | 2.7331641144  | 0.1245881407  |
| H24 | 4.8384814924  | 3.0778969609  | -0.6714945175 |
| H25 | 4.2767698342  | 1.6515954654  | 0.2263073410  |
| H26 | 4.4976222408  | 3.1957835311  | 1.0570964356  |
| C27 | 2.3934841062  | 2.5039907636  | -1.6251940768 |
| H28 | 3.1600085255  | 2.8232073626  | -2.3421304587 |
| H29 | 1.4274798154  | 2.8460622163  | -2.0100330106 |
| H30 | 2.3914163022  | 1.4123445194  | -1.5905790637 |
| C31 | 1.4078345623  | -3.3987850557 | 2.6129142350  |
| C32 | 0.5630381519  | -2.6344821944 | 3.6549810409  |
| H33 | 0.4559458060  | -3.2629869158 | 4.5483206507  |
| H34 | -0.4424990121 | -2.4009313758 | 3.2912612068  |
| H35 | 1.0363573347  | -1.6948916352 | 3.9413238364  |
| C36 | 2.8229971118  | -3.5843209184 | 3.1947854721  |
| H37 | 3.3436001814  | -2.6266778640 | 3.2906154139  |
| H38 | 3.4377281469  | -4.2561011866 | 2.5893118180  |
| H39 | 2.7476988074  | -4.0283948625 | 4.1954125324  |
| C40 | 0.7439836879  | -4.7766696854 | 2.3961621174  |
| H41 | 1.2933586031  | -5.4179295111 | 1.7072615832  |
| H42 | -0.2832227328 | -4.6867103963 | 2.0299027446  |
| H43 | 0.6957272207  | -5.2993831002 | 3.3598313685  |
| C44 | 2.7143736959  | -3.1138144631 | -0.2450073117 |
| C45 | 4.1647345970  | -2.7316077786 | 0.1183559898  |

|     |               |               |               |
|-----|---------------|---------------|---------------|
| H46 | 4.8351981941  | -3.0763339689 | -0.6794562736 |
| H47 | 4.4990400783  | -3.1938529655 | 1.0500995128  |
| H48 | 4.2755124353  | -1.6499603547 | 0.2194507295  |
| C49 | 2.6112994486  | -4.6461962439 | -0.3731757103 |
| H50 | 1.5903336954  | -4.9847326374 | -0.5786942311 |
| H51 | 2.9762654469  | -5.1664781849 | 0.5157411773  |
| H52 | 3.2355041305  | -4.9735099291 | -1.2146893271 |
| C53 | 2.3881071206  | -2.5028934455 | -1.6269011782 |
| H54 | 2.3855238886  | -1.4112393275 | -1.5922401687 |
| H55 | 1.4214786269  | -2.8455052037 | -2.0096677777 |
| H56 | 3.1532865043  | -2.8216840568 | -2.3454509181 |
| C57 | -2.2295849549 | -1.2499536877 | -0.4998381144 |
| C58 | -0.6816698734 | -1.2809288856 | -0.4680661553 |
| C59 | -0.0258202098 | 0.0000294100  | 0.0736137855  |
| C60 | -0.6807461701 | 1.2803875532  | -0.4707019330 |
| C61 | -2.2286854022 | 1.2504675578  | -0.5032112081 |
| C62 | -2.7692570831 | -0.0004817525 | -1.1979221462 |
| H63 | -2.6037870422 | -1.2740381474 | 0.5340219441  |
| H64 | -2.6013362146 | -2.1605424895 | -0.9874674439 |
| H65 | -0.3511754866 | -1.3390916317 | -1.5198962381 |
| H66 | -0.3495006568 | 1.3363521526  | -1.5224300630 |
| H67 | -2.6033308818 | 1.2777995483  | 0.5303929592  |
| H68 | -2.5994755622 | 2.1600111862  | -0.9935267367 |
| H69 | -2.4661087491 | -0.0020497923 | -2.2551477478 |
| H70 | -3.8663466406 | -0.0000163453 | -1.1876791483 |
| C71 | -0.2046651295 | 2.5572644739  | 0.2548705021  |
| H72 | -0.2615658893 | 3.4378461368  | -0.3947787376 |
| H73 | -0.8823280512 | 2.7456459287  | 1.0947825389  |
| C74 | -0.2057219162 | -2.5566299755 | 0.2597171233  |
| H75 | -0.2653074460 | -3.4387919236 | -0.3875624071 |
| H76 | -0.8816408231 | -2.7417765059 | 1.1017982071  |
| H77 | 2.9381007192  | 0.0005891272  | 2.1887169230  |
| H78 | 2.9186955486  | 0.0004615793  | 0.2296600268  |

**TS23-12**

|     |               |               |               |
|-----|---------------|---------------|---------------|
| H1  | 0.0000000000  | 0.0000000000  | 1.8135980000  |
| Ir2 | 1.5910500000  | 0.0000000000  | 1.1890500000  |
| P3  | 1.5066290000  | 2.3163420000  | 0.9926340000  |
| P4  | 1.5069330000  | -2.3165390000 | 0.9927870000  |
| C5  | 1.4260000000  | 3.3679580000  | 2.5994380000  |
| C6  | 0.5504930000  | 2.5842000000  | 3.6027260000  |
| H7  | 0.9645430000  | 1.5949080000  | 3.8029620000  |
| H8  | -0.4753790000 | 2.4493820000  | 3.2442500000  |
| H9  | 0.4989690000  | 3.1492890000  | 4.5422450000  |
| C10 | 0.7995910000  | 4.7658690000  | 2.4097950000  |
| H11 | 0.7169500000  | 5.2524350000  | 3.3900030000  |
| H12 | -0.2107120000 | 4.7152050000  | 1.9922580000  |
| H13 | 1.3958030000  | 5.4202720000  | 1.7729320000  |
| C14 | 2.8360860000  | 3.5062030000  | 3.2058460000  |
| H15 | 3.4764670000  | 4.1715600000  | 2.6196170000  |
| H16 | 3.3292640000  | 2.5334500000  | 3.2943930000  |
| H17 | 2.7571660000  | 3.9367940000  | 4.2120000000  |
| C18 | 2.7342750000  | 3.0873230000  | -0.2717880000 |
| C19 | 2.6188020000  | 4.6168650000  | -0.4163600000 |
| H20 | 2.9909190000  | 5.1454740000  | 0.4650100000  |
| H21 | 1.5927380000  | 4.9471090000  | -0.6093640000 |
| H22 | 3.2299210000  | 4.9423280000  | -1.2681820000 |
| C23 | 4.1861290000  | 2.7196770000  | 0.0977560000  |
| H24 | 4.8578200000  | 3.0817870000  | -0.6911990000 |
| H25 | 4.3078990000  | 1.6379770000  | 0.1857490000  |
| H26 | 4.5088620000  | 3.1737880000  | 1.0374880000  |
| C27 | 2.4139760000  | 2.4417120000  | -1.6392350000 |
| H28 | 3.1791680000  | 2.7438670000  | -2.3652300000 |
| H29 | 1.4455840000  | 2.7675180000  | -2.0326060000 |
| H30 | 2.4121260000  | 1.3508340000  | -1.5714300000 |
| C31 | 1.4257560000  | -3.3697160000 | 2.5991800000  |
| C32 | 0.5491100000  | -2.5862830000 | 3.6018190000  |
| H33 | 0.4979310000  | -3.1507150000 | 4.5417540000  |
| H34 | -0.4768410000 | -2.4525910000 | 3.2431440000  |
| H35 | 0.9621830000  | -1.5964670000 | 3.8015840000  |
| C36 | 2.8355190000  | -3.5060820000 | 3.2067030000  |

|     |               |               |               |
|-----|---------------|---------------|---------------|
| H37 | 3.3270570000  | -2.5325340000 | 3.2958260000  |
| H38 | 3.4775570000  | -4.1703340000 | 2.6210290000  |
| H39 | 2.7563180000  | -3.9367840000 | 4.2127850000  |
| C40 | 0.8004850000  | -4.7678350000 | 2.4088400000  |
| H41 | 1.3979470000  | -5.4220610000 | 1.7730130000  |
| H42 | -0.2092660000 | -4.7176840000 | 1.9898970000  |
| H43 | 0.7167420000  | -5.2541300000 | 3.3890730000  |
| C44 | 2.7358680000  | -3.0861760000 | -0.2708550000 |
| C45 | 4.1869630000  | -2.7155160000 | 0.0988910000  |
| H46 | 4.8598990000  | -3.0787990000 | -0.6884740000 |
| H47 | 4.5095130000  | -3.1664500000 | 1.0402000000  |
| H48 | 4.3071080000  | -1.6334310000 | 0.1840750000  |
| C49 | 2.6229760000  | -4.6159890000 | -0.4139650000 |
| H50 | 1.5975440000  | -4.9480980000 | -0.6071390000 |
| H51 | 2.9955430000  | -5.1429650000 | 0.4681740000  |
| H52 | 3.2350860000  | -4.9413490000 | -1.2651060000 |
| C53 | 2.4146270000  | -2.4421830000 | -1.6387300000 |
| H54 | 2.4111210000  | -1.3512490000 | -1.5717450000 |
| H55 | 1.4466630000  | -2.7697200000 | -2.0316900000 |
| H56 | 3.1801840000  | -2.7437360000 | -2.3645810000 |
| C57 | -2.2477080000 | -1.2523380000 | -0.4159520000 |
| C58 | -0.7012200000 | -1.2862240000 | -0.4636840000 |
| C59 | 0.0000000000  | 0.0000000000  | 0.0000000000  |
| C60 | -0.7016640000 | 1.2862860000  | -0.4631680000 |
| C61 | -2.2480800000 | 1.2522360000  | -0.4154500000 |
| C62 | -2.8206420000 | 0.0000240000  | -1.0831540000 |
| H63 | -2.5666420000 | -1.2769860000 | 0.6363780000  |
| H64 | -2.6481140000 | -2.1602350000 | -0.8860910000 |
| H65 | -0.4231180000 | -1.3511580000 | -1.5299780000 |
| H66 | -0.4236000000 | 1.3517100000  | -1.5294610000 |
| H67 | -2.5671660000 | 1.2765810000  | 0.6368520000  |
| H68 | -2.6485170000 | 2.1602460000  | -0.8854180000 |
| H69 | -2.5701050000 | 0.0002870000  | -2.1542630000 |
| H70 | -3.9158350000 | -0.0000990000 | -1.0198100000 |
| C71 | -0.1878130000 | 2.5610240000  | 0.2427660000  |
| H72 | -0.2357300000 | 3.4321690000  | -0.4195490000 |
| H73 | -0.8532370000 | 2.7770630000  | 1.0853070000  |
| C74 | -0.1870480000 | -2.5611950000 | 0.2417600000  |
| H75 | -0.2343970000 | -3.4319870000 | -0.4211010000 |
| H76 | -0.8527940000 | -2.7778730000 | 1.0839310000  |
| H77 | 2.2879540000  | -0.0000740000 | 2.6840340000  |
| H78 | 3.1938120000  | 0.0002820000  | 0.9508320000  |

### TS8-13

|     |               |               |               |
|-----|---------------|---------------|---------------|
| H1  | -0.0653051292 | -0.2425850509 | 0.9128956184  |
| Ir2 | 1.4753918064  | 0.0831071640  | 1.3723016837  |
| P3  | 0.8437065424  | 2.2811196035  | 1.0224014528  |
| P4  | 1.8556811010  | -2.0923112099 | 0.7611568771  |
| C5  | 1.2156060968  | 3.8150802710  | 2.0786324565  |
| C6  | 0.4364420597  | 3.6089752291  | 3.3968449740  |
| H7  | 0.6551082045  | 2.6321796077  | 3.8405065001  |
| H8  | -0.6459575687 | 3.6887289169  | 3.2527480415  |
| H9  | 0.7314913961  | 4.3826550862  | 4.1164416432  |
| C10 | 0.8064493657  | 5.1549205121  | 1.4425185973  |
| H11 | 0.9400647442  | 5.9628578087  | 2.1737844904  |
| H12 | -0.2433329694 | 5.1670808738  | 1.1312061488  |
| H13 | 1.4239875479  | 5.4005273611  | 0.5739054892  |
| C14 | 2.7246010447  | 3.8214711461  | 2.4000487382  |
| H15 | 3.3353254785  | 3.9992402361  | 1.5099337445  |
| H16 | 3.0368296871  | 2.8699732804  | 2.8399620251  |
| H17 | 2.9413854710  | 4.6243325819  | 3.1163210059  |
| C18 | 1.2989973502  | 2.4316726015  | -0.8211013223 |
| C19 | 2.8139367583  | 2.6402964621  | -1.0056551433 |
| H20 | 3.3884186629  | 1.9364327472  | -0.3972690826 |
| H21 | 3.1177514205  | 3.6583637978  | -0.7377253900 |
| H22 | 3.0868914983  | 2.4875554173  | -2.0579509142 |
| C23 | 0.8907165108  | 0.9951689931  | -1.3407849327 |
| H24 | 0.3863125855  | 1.1170098864  | -2.3171749728 |
| H25 | 2.6993485330  | 0.2188862334  | 2.4334335796  |
| H26 | 1.8004729868  | 0.4223209910  | -1.5273988142 |
| C27 | 0.5583256587  | 3.5253883800  | -1.6182987044 |

|     |               |               |               |
|-----|---------------|---------------|---------------|
| H28 | 0.8336072079  | 3.4483845482  | -2.6782597608 |
| H29 | 0.8299944321  | 4.5308707397  | -1.2871425922 |
| H30 | -0.5296275433 | 3.4357751953  | -1.5627678493 |
| C31 | 1.1906623811  | -3.5316268188 | 1.8895091881  |
| C32 | 2.2723355328  | -4.0165529874 | 2.8763499452  |
| H33 | 3.0701611613  | -4.5812674811 | 2.3883405532  |
| H34 | 1.8046033785  | -4.6879325837 | 3.6079768251  |
| H35 | 2.7178674654  | -3.1860817395 | 3.4313603299  |
| C36 | 0.6506613862  | -4.7415732242 | 1.1027293428  |
| H37 | 1.4003715481  | -5.1842117964 | 0.4404247198  |
| H38 | -0.2247919222 | -4.4841797963 | 0.4999925953  |
| H39 | 0.3362979323  | -5.5220886126 | 1.8081932610  |
| C40 | 0.0542992309  | -2.9345772482 | 2.7486436656  |
| H41 | -0.7982688947 | -2.6058760274 | 2.1511808603  |
| H42 | 0.4059258871  | -2.0686941426 | 3.3160321149  |
| H43 | -0.3088024029 | -3.6996928978 | 3.4479818176  |
| C44 | 3.6574393317  | -2.5075229816 | 0.1884844199  |
| C45 | 4.6421274365  | -2.3458853231 | 1.3687810881  |
| H46 | 5.6686341052  | -2.3876855169 | 0.9825586856  |
| H47 | 4.5491299536  | -3.1309821671 | 2.1184110971  |
| H48 | 4.5005537637  | -1.3802033479 | 1.8619994790  |
| C49 | 3.7973558932  | -3.9056624061 | -0.4424907871 |
| H50 | 3.1201820646  | -4.0450806793 | -1.2922237121 |
| H51 | 3.6107568539  | -4.7091590027 | 0.2749756795  |
| H52 | 4.8206483016  | -4.0389548666 | -0.8178252834 |
| C53 | 4.0699528717  | -1.4436047532 | -0.8544242276 |
| H54 | 3.9219595097  | -0.4347141559 | -0.4595455605 |
| H55 | 3.5285520695  | -1.5293528768 | -1.8011444523 |
| H56 | 5.1348238388  | -1.5702680066 | -1.0855104721 |
| C57 | -1.6270184171 | -1.9092347304 | -0.5950445464 |
| C58 | -0.3160632709 | -1.2420376570 | -1.0601098306 |
| C59 | -0.0678559158 | 0.1622632080  | -0.4305766846 |
| C60 | -1.3435238834 | 1.0413288254  | -0.1987975805 |
| C61 | -2.5698594244 | 0.2448190864  | 0.2730919658  |
| C62 | -2.8320578377 | -0.9639180742 | -0.6303196592 |
| H63 | -1.5126500623 | -2.2822097857 | 0.4286506335  |
| H64 | -1.8093938389 | -2.7907586222 | -1.2233811666 |
| H65 | -0.4263310343 | -1.0849112202 | -2.1463382128 |
| H66 | -1.6084389353 | 1.4834911610  | -1.1713674682 |
| H67 | -2.4060695634 | -0.1034315530 | 1.3031320081  |
| H68 | -3.4416158633 | 0.9112056241  | 0.3048101371  |
| H69 | -3.0175209083 | -0.6264220390 | -1.6606592579 |
| H70 | -3.7360269473 | -1.4951534236 | -0.3083277855 |
| C71 | -1.0120873932 | 2.2011190366  | 0.7954201350  |
| H72 | -1.4402117400 | 3.1523923771  | 0.4605979703  |
| H73 | -1.4445965291 | 1.9770858697  | 1.7750385507  |
| C74 | 0.8985911134  | -2.2047807488 | -0.8876274611 |
| H75 | 1.6440336899  | -1.9586088362 | -1.6460241378 |
| H76 | 0.5858409858  | -3.2314788999 | -1.1031367024 |

### 13

|     |               |               |               |
|-----|---------------|---------------|---------------|
| H1  | 0.0300547187  | -0.1545588286 | 0.6129050773  |
| Tr2 | 1.5830506315  | 0.0958119599  | 1.4165010135  |
| P3  | 0.8520066745  | 2.2665866189  | 1.0443997045  |
| P4  | 1.8688327777  | -2.0804321264 | 0.7647236432  |
| C5  | 1.1612367315  | 3.8326972175  | 2.0801494629  |
| C6  | 0.4024382300  | 3.6036161931  | 3.4063536384  |
| H7  | 0.6604872914  | 2.6371694898  | 3.8513509210  |
| H8  | -0.6833288171 | 3.6429129473  | 3.2714893005  |
| H9  | 0.6750062548  | 4.3906618738  | 4.1202506244  |
| C10 | 0.6947531261  | 5.1525927793  | 1.4425838682  |
| H11 | 0.7936681791  | 5.9659648958  | 2.1733842579  |
| H12 | -0.3544513866 | 5.1211284494  | 1.1310660864  |
| H13 | 1.3014455136  | 5.4241354279  | 0.5742947682  |
| C14 | 2.6716247835  | 3.9010024554  | 2.3871565180  |
| H15 | 3.2665073407  | 4.0908205255  | 1.4886555254  |
| H16 | 3.0243719313  | 2.9673389418  | 2.8347716061  |
| H17 | 2.8648276323  | 4.7198289059  | 3.0920483244  |
| C18 | 1.2561199660  | 2.4315243186  | -0.8123003149 |
| C19 | 2.7645424115  | 2.6508359137  | -1.0337174783 |
| H20 | 3.3525083018  | 1.9415137421  | -0.4445774613 |

|     |               |               |               |
|-----|---------------|---------------|---------------|
| H21 | 3.0686632488  | 3.6673360430  | -0.7605964688 |
| H22 | 3.0127470478  | 2.5123044906  | -2.0942398671 |
| C23 | 0.8576056335  | 0.9952198465  | -1.3408337637 |
| H24 | 0.3954962092  | 1.1187277719  | -2.3358690569 |
| H25 | 2.7183183961  | 0.2049743520  | 2.5204352787  |
| H26 | 1.7712066543  | 0.4175855543  | -1.4857516183 |
| C27 | 0.4890329610  | 3.5243763720  | -1.5861572584 |
| H28 | 0.7187023525  | 3.4378400815  | -2.6562482661 |
| H29 | 0.7845228588  | 4.5290356075  | -1.2747929300 |
| H30 | -0.5962925289 | 3.4484425058  | -1.4836323789 |
| C31 | 1.1574328568  | -3.5018944640 | 1.8869747123  |
| C32 | 2.2196096173  | -3.9952548564 | 2.8903364323  |
| H33 | 3.0082361521  | -4.5851185502 | 2.4167925066  |
| H34 | 1.7326805434  | -4.6439361503 | 3.6299981193  |
| H35 | 2.6797853594  | -3.1649280806 | 3.4338802844  |
| C36 | 0.6011634376  | -4.7096403491 | 1.1084129840  |
| H37 | 1.3467341312  | -5.1746103486 | 0.4573464729  |
| H38 | -0.2643748300 | -4.4425119169 | 0.4956853215  |
| H39 | 0.2651862694  | -5.4759982065 | 1.8193339711  |
| C40 | 0.0225598084  | -2.8715301113 | 2.7241560877  |
| H41 | -0.8061000889 | -2.5141180937 | 2.1090397466  |
| H42 | 0.3889713137  | -2.0170718429 | 3.2994631395  |
| H43 | -0.3798401700 | -3.6260071225 | 3.4136680250  |
| C44 | 3.6412249808  | -2.5706665743 | 0.1543080234  |
| C45 | 4.6432846691  | -2.4129821699 | 1.3202354588  |
| H46 | 5.6634035724  | -2.5153118149 | 0.9291819382  |
| H47 | 4.5197276642  | -3.1644928404 | 2.0990958983  |
| H48 | 4.5480574326  | -1.4250058038 | 1.7785367454  |
| C49 | 3.7367671001  | -3.9837968398 | -0.4496772495 |
| H50 | 3.0390038559  | -4.1259229021 | -1.2821504497 |
| H51 | 3.5484946279  | -4.7677961864 | 0.2886835411  |
| H52 | 4.7486972038  | -4.1476638676 | -0.8436520842 |
| C53 | 4.0670350386  | -1.5365074878 | -0.9131259270 |
| H54 | 3.9197636640  | -0.5172179386 | -0.5438429159 |
| H55 | 3.5316773229  | -1.6466331337 | -1.8609804268 |
| H56 | 5.1326791053  | -1.6737812992 | -1.1342318290 |
| C57 | -1.6723833818 | -1.9172998395 | -0.6590672504 |
| C58 | -0.3584464268 | -1.2513199422 | -1.1150632992 |
| C59 | -0.1520580720 | 0.1620340663  | -0.4992531058 |
| C60 | -1.4025796543 | 1.0482038888  | -0.2188673813 |
| C61 | -2.6246709127 | 0.2315217732  | 0.2306889923  |
| C62 | -2.8719702615 | -0.9630675131 | -0.6980745315 |
| H63 | -1.5647492178 | -2.2918523642 | 0.3648209716  |
| H64 | -1.8562633579 | -2.7967753826 | -1.2892456848 |
| H65 | -0.4400242900 | -1.1195019844 | -2.2059617225 |
| H66 | -1.6711384866 | 1.5449868319  | -1.1619762238 |
| H67 | -2.4597178861 | -0.1386792400 | 1.2525673363  |
| H68 | -3.5040084734 | 0.8865055071  | 0.2750244635  |
| H69 | -3.0404381169 | -0.6092504534 | -1.7259735617 |
| H70 | -3.7829221786 | -1.4954599844 | -0.3992124724 |
| C71 | -1.0215552366 | 2.1412923608  | 0.8376262848  |
| H72 | -1.4651747367 | 3.1089394259  | 0.5779726109  |
| H73 | -1.4241209091 | 1.8535683307  | 1.8131002869  |
| C74 | 0.8807696091  | -2.1800674881 | -0.8878326215 |
| H75 | 1.6273836487  | -1.9329244319 | -1.6441690995 |
| H76 | 0.5898579341  | -3.2155676059 | -1.0910812310 |

#### TS13-10

|     |               |               |              |
|-----|---------------|---------------|--------------|
| H1  | -0.2590786806 | -0.3734837151 | 1.0801188175 |
| Ir2 | 1.7012812341  | 0.0974619455  | 1.3779259550 |
| P3  | 0.9515788494  | 2.2878845246  | 1.2873664667 |
| P4  | 1.9219630156  | -2.1342988303 | 0.8619454891 |
| C5  | 1.2008150849  | 3.8159969955  | 2.3848313505 |
| C6  | 0.2848178795  | 3.6383961693  | 3.6153873689 |
| H7  | 0.4540267328  | 2.6732816189  | 4.1042770426 |
| H8  | -0.7759530788 | 3.7131152977  | 3.3560297641 |
| H9  | 0.5013882976  | 4.4278452399  | 4.3458832264 |
| C10 | 0.8647825193  | 5.1378028389  | 1.6715220575 |
| H11 | 0.9571927699  | 5.9731220990  | 2.3780071865 |
| H12 | -0.1586608250 | 5.1521375304  | 1.2819165945 |
| H13 | 1.5479781471  | 5.3368882372  | 0.8405700676 |

|     |               |               |               |
|-----|---------------|---------------|---------------|
| C14 | 2.6670531613  | 3.8246149556  | 2.8625487181  |
| H15 | 3.3675858339  | 3.9884892691  | 2.0390723806  |
| H16 | 2.9300154224  | 2.8770772405  | 3.3415175412  |
| H17 | 2.8106117560  | 4.6353684330  | 3.5883220146  |
| C18 | 1.5780713173  | 2.4254553635  | -0.4981284607 |
| C19 | 3.0934335788  | 2.7145529945  | -0.5291149361 |
| H20 | 3.6327756618  | 2.0491040702  | 0.1497913067  |
| H21 | 3.3104308463  | 3.7530151347  | -0.2540861397 |
| H22 | 3.4779572515  | 2.5606682300  | -1.5457838704 |
| C23 | 1.3299196690  | 0.9174201229  | -0.8547044995 |
| H24 | 0.7200536331  | 0.8346322224  | -1.7600368687 |
| H25 | 2.6853644364  | 0.0664511175  | 2.6424272740  |
| H26 | 2.2675157892  | 0.4006569234  | -1.0628771065 |
| C27 | 0.8751282607  | 3.4040173833  | -1.4562325988 |
| H28 | 1.2020944250  | 3.2053870622  | -2.4855133632 |
| H29 | 1.1371251867  | 4.4418892063  | -1.2283012506 |
| H30 | -0.2138674025 | 3.3252662287  | -1.4388198036 |
| C31 | 1.3597496470  | -3.3343567464 | 2.2672533241  |
| C32 | 2.1693204177  | -3.0314549330 | 3.5462686641  |
| H33 | 3.2155910102  | -3.3291068713 | 3.4622893353  |
| H34 | 1.7368979080  | -3.5934147603 | 4.3843848834  |
| H35 | 2.1354907620  | -1.9666633857 | 3.7841211345  |
| C36 | 1.4665252706  | -4.8324473637 | 1.9292222296  |
| H37 | 2.5053260072  | -5.1701838786 | 1.8788040387  |
| H38 | 0.9748980383  | -5.0907037049 | 0.9841845325  |
| H39 | 0.9771940911  | -5.4172615400 | 2.7195755160  |
| C40 | -0.1156130419 | -3.0032432081 | 2.5752898834  |
| H41 | -0.7830818864 | -3.2495757609 | 1.7445526642  |
| H42 | -0.2382937936 | -1.9446695110 | 2.8205698767  |
| H43 | -0.4404719727 | -3.5946375391 | 3.4405936041  |
| C44 | 3.5684423302  | -2.7774082609 | 0.0824132430  |
| C45 | 4.6445494540  | -2.8963909062 | 1.1799852236  |
| H46 | 5.6278702991  | -3.0284266690 | 0.7105994715  |
| H47 | 4.4792129120  | -3.7610946739 | 1.8286675868  |
| H48 | 4.6839425117  | -1.9961920692 | 1.8008862341  |
| C49 | 3.4693412649  | -4.1094704803 | -0.6888654892 |
| H50 | 2.7285291769  | -4.0770136981 | -1.4935292425 |
| H51 | 3.2268841289  | -4.9558710447 | -0.0456469421 |
| H52 | 4.4398139976  | -4.3226513648 | -1.1553365371 |
| C53 | 4.0280799389  | -1.6826629138 | -0.9044163314 |
| H54 | 4.1636448218  | -0.7271261353 | -0.3911361518 |
| H55 | 3.3194097224  | -1.5376138956 | -1.7270721904 |
| H56 | 4.9863667794  | -1.9775795274 | -1.3511009233 |
| C57 | -1.8328407867 | -1.7828165788 | -0.7233276617 |
| C58 | -0.3704823625 | -1.2863997231 | -0.8494156759 |
| C59 | -0.1769511887 | -0.0360091510 | 0.0152844528  |
| C60 | -1.2220348072 | 1.0811819148  | -0.0848805873 |
| C61 | -2.6413117306 | 0.4976524771  | 0.0636942691  |
| C62 | -2.8577735694 | -0.6558471521 | -0.9290354458 |
| H63 | -1.9825697081 | -2.2198883389 | 0.2727031080  |
| H64 | -2.0078126865 | -2.5891032860 | -1.4477328776 |
| H65 | -0.2342083288 | -1.0007142458 | -1.9049208740 |
| H66 | -1.1805097403 | 1.5324735648  | -1.0864019873 |
| H67 | -2.7817734713 | 0.1298968952  | 1.0900408030  |
| H68 | -3.3889519956 | 1.2861424814  | -0.0952529756 |
| H69 | -2.7780702907 | -0.2700673989 | -1.9561807741 |
| H70 | -3.8742079498 | -1.0557505031 | -0.8288291776 |
| C71 | -0.9034491461 | 2.1765999535  | 0.9705104253  |
| H72 | -1.3276298753 | 3.1435760902  | 0.6749992363  |
| H73 | -1.3620113390 | 1.8997170630  | 1.9258312567  |
| C74 | 0.6629495395  | -2.4278871148 | -0.5456882202 |
| H75 | 1.2597999738  | -2.6034450130 | -1.4445910217 |
| H76 | 0.1362107971  | -3.3705546646 | -0.3605736941 |

#### 14

|     |              |               |              |
|-----|--------------|---------------|--------------|
| H1  | 3.3693647349 | 0.0624042676  | 2.1908152676 |
| Ir2 | 1.9403973807 | -0.0360935678 | 1.5657992692 |
| P3  | 1.5051516040 | -2.3067310127 | 1.2115997867 |
| P4  | 1.2005224264 | 2.1654368351  | 1.7003063121 |
| C5  | 2.7671234314 | -3.7121363473 | 1.3877420994 |
| C6  | 3.8208640137 | -3.4648094509 | 0.2843575282 |

|     |               |               |               |
|-----|---------------|---------------|---------------|
| H7  | 4.1928602872  | -2.4362798122 | 0.3104018306  |
| H8  | 3.4206094044  | -3.6611583092 | -0.7157560596 |
| H9  | 4.6691057566  | -4.1427770247 | 0.4400537378  |
| C10 | 2.1914288149  | -5.1315631233 | 1.2425573789  |
| H11 | 3.0156495527  | -5.8564092443 | 1.2282972414  |
| H12 | 1.6264084238  | -5.2627487553 | 0.3139547617  |
| H13 | 1.5417753998  | -5.3979758094 | 2.0809177959  |
| C14 | 3.4457101124  | -3.5575126532 | 2.7650182097  |
| H15 | 2.7492993146  | -3.7361488757 | 3.5897947856  |
| H16 | 3.8635827291  | -2.5544223102 | 2.8877972028  |
| H17 | 4.2603335327  | -4.2876183359 | 2.8524458740  |
| C18 | -0.1691427567 | -2.5863684500 | 2.0879765695  |
| C19 | -0.9661259283 | -3.8171882493 | 1.5975472306  |
| H20 | -0.4733472310 | -4.7533868777 | 1.8698834548  |
| H21 | -1.1370382142 | -3.8318424781 | 0.5192203792  |
| H22 | -1.9514893984 | -3.8210729791 | 2.0806452940  |
| C23 | -0.0217464577 | -2.7085822993 | 3.6150036158  |
| H24 | -1.0106221277 | -2.6454423627 | 4.0876035826  |
| H25 | 0.6037246367  | -1.9083524249 | 4.0164098057  |
| H26 | 0.4105837158  | -3.6745519283 | 3.8993302808  |
| C27 | -0.9404303953 | -1.2485296200 | 1.7394451697  |
| H28 | -0.8949151574 | -0.5886393134 | 2.6050885507  |
| H29 | -1.9997258854 | -1.5082676938 | 1.5805690500  |
| H30 | 1.4145387095  | -0.2032017835 | 3.1344822734  |
| C31 | 1.8970083661  | 3.5098115579  | 0.4781483314  |
| C32 | 2.3237194525  | 2.8181090098  | -0.8332489445 |
| H33 | 2.7215710795  | 3.5808473539  | -1.5154196142 |
| H34 | 1.4958153107  | 2.3220485153  | -1.3436956530 |
| H35 | 3.0870702300  | 2.0606634100  | -0.6530697186 |
| C36 | 3.1839942635  | 4.1317652894  | 1.0636368393  |
| H37 | 3.9028509345  | 3.3585163294  | 1.3519182866  |
| H38 | 3.0021185254  | 4.7772876786  | 1.9249054865  |
| H39 | 3.6597370309  | 4.7499652519  | 0.2917558900  |
| C40 | 0.8839421772  | 4.6193856004  | 0.1290875346  |
| H41 | 0.5056721573  | 5.1535349025  | 1.0022892175  |
| H42 | 0.0267485079  | 4.2257732386  | -0.4254616796 |
| H43 | 1.3714915179  | 5.3582084245  | -0.5199081171 |
| C44 | 1.1206991962  | 2.9548344707  | 3.4813782136  |
| C45 | 2.5264894617  | 2.8207267047  | 4.1085084694  |
| H46 | 2.4942385353  | 3.1869585283  | 5.1426562203  |
| H47 | 3.2883643147  | 3.3966179233  | 3.5811553238  |
| H48 | 2.8377468144  | 1.7730726238  | 4.1203851731  |
| C49 | 0.6484336579  | 4.4216204101  | 3.5226842271  |
| H50 | -0.3430911779 | 4.5470769634  | 3.0743269392  |
| H51 | 1.3366579339  | 5.1120220944  | 3.0318471888  |
| H52 | 0.5686263539  | 4.7383910454  | 4.5707028290  |
| C53 | 0.1552302961  | 2.1423135450  | 4.3741315775  |
| H54 | 0.3292410626  | 1.0681798582  | 4.2786143297  |
| H55 | -0.8967950222 | 2.3610108602  | 4.1649108245  |
| H56 | 0.3324555375  | 2.4230728001  | 5.4194838695  |
| C57 | -1.2673020347 | 1.4035239467  | -1.1369403869 |
| C58 | -1.2293203203 | 0.8905829889  | 0.3181943076  |
| C59 | -0.4875022033 | -0.4680252146 | 0.4743193370  |
| C60 | -0.4307379546 | -1.4638369930 | -0.7227763762 |
| C61 | -0.4296842421 | -0.7631724817 | -2.0900088862 |
| C62 | -1.5341295258 | 0.2983835985  | -2.1661085220 |
| H63 | -0.3126759475 | 1.8764075928  | -1.3876288316 |
| H64 | -2.0270468194 | 2.1923712055  | -1.2081276785 |
| H65 | -2.2762240985 | 0.7241326759  | 0.6176931376  |
| H66 | 0.5830163857  | -0.0853101695 | 0.3842441300  |
| H67 | -1.3387963622 | -2.0808995898 | -0.6768381912 |
| H68 | 0.5438543184  | -0.2813102811 | -2.2537052157 |
| H69 | -0.5460469304 | -1.5130113173 | -2.8828517909 |
| H70 | -2.5146457675 | -0.1657044199 | -1.9830839682 |
| H71 | -1.5778448151 | 0.7317041202  | -3.1724136913 |
| C72 | 0.8233660832  | -2.3911264904 | -0.5448108955 |
| H73 | 0.5925018101  | -3.4204265894 | -0.8406859483 |
| H74 | 1.6274320062  | -2.0316127169 | -1.1917311035 |
| C75 | -0.6832194462 | 1.9737008505  | 1.3108703396  |
| H76 | -1.0980786134 | 1.7503557682  | 2.2938453790  |
| H77 | -1.0930986260 | 2.9497912712  | 1.0282887557  |

|                |               |               |               |
|----------------|---------------|---------------|---------------|
| H78            | 2.7407070279  | 0.0652316781  | 0.1036320636  |
| <b>TS14-11</b> |               |               |               |
| H1             | 3.3540931332  | 0.2015598092  | 1.9948975175  |
| Ir2            | 1.8510006982  | -0.0283349537 | 1.5935269388  |
| P3             | 1.6281898414  | -2.2990874542 | 1.1350727739  |
| P4             | 1.1377080793  | 2.1926994767  | 1.6730893402  |
| C5             | 2.9198190810  | -3.6852184951 | 1.1666401705  |
| C6             | 3.8380462119  | -3.4729617014 | -0.0561844053 |
| H7             | 4.2273766176  | -2.4505277216 | -0.0920803272 |
| H8             | 3.3223078266  | -3.6785297324 | -0.9995226289 |
| H9             | 4.6916583208  | -4.1588518997 | 0.0093401312  |
| C10            | 2.2980125839  | -5.0926454540 | 1.1171127794  |
| H11            | 3.0955682825  | -5.8451986066 | 1.0654393491  |
| H12            | 1.6584187999  | -5.2353249299 | 0.2397064883  |
| H13            | 1.7041725109  | -5.3080666859 | 2.0103607550  |
| C14            | 3.7594601912  | -3.5193713925 | 2.4498562210  |
| H15            | 3.1673485223  | -3.6841193074 | 3.3542743086  |
| H16            | 4.1918911859  | -2.5166625867 | 2.5111544890  |
| H17            | 4.5768858365  | -4.2516550127 | 2.4477638931  |
| C18            | 0.1218414099  | -2.5365721513 | 2.2397770867  |
| C19            | -0.8799310259 | -3.6470612179 | 1.8618810105  |
| H20            | -0.4857627656 | -4.6347627849 | 2.1198237457  |
| H21            | -1.1474616255 | -3.6635107651 | 0.8040343653  |
| H22            | -1.8074113165 | -3.5113796315 | 2.4328218181  |
| C23            | 0.4817876179  | -2.7274903922 | 3.7255304786  |
| H24            | -0.4288612269 | -2.6406686872 | 4.3316227093  |
| H25            | 1.1952659696  | -1.9729535375 | 4.0614110576  |
| H26            | 0.8984887321  | -3.7241512172 | 3.9083215163  |
| C27            | -0.4457024230 | -1.0933064904 | 2.0019858775  |
| H28            | -0.4796325272 | -0.4983720324 | 2.9059627752  |
| H29            | -1.4534460390 | -1.1472248827 | 1.5886355506  |
| H30            | 1.7198373077  | -0.2245450050 | 3.2322722269  |
| C31            | 2.1347958837  | 3.4191542626  | 0.5548253435  |
| C32            | 1.9167969063  | 2.9996864200  | -0.9147242366 |
| H33            | 2.5938083936  | 3.5831188447  | -1.5511524450 |
| H34            | 0.8980356295  | 3.2018444765  | -1.2596956176 |
| H35            | 2.1460275311  | 1.9412971276  | -1.0625802851 |
| C36            | 3.6363325220  | 3.2498064072  | 0.8714732209  |
| H37            | 3.9437014228  | 2.2098266750  | 0.7419052235  |
| H38            | 3.8873702210  | 3.5557126935  | 1.8903269033  |
| H39            | 4.2204185215  | 3.8768995225  | 0.1853817673  |
| C40            | 1.7476769769  | 4.9038594182  | 0.6862427721  |
| H41            | 2.0582898586  | 5.3302873182  | 1.6430640347  |
| H42            | 0.6732127005  | 5.0755502373  | 0.5619806664  |
| H43            | 2.2594296613  | 5.4753355183  | -0.0989351881 |
| C44            | 0.8173231079  | 2.9972221923  | 3.4062846190  |
| C45            | 2.1750460649  | 3.2422676675  | 4.0932544721  |
| H46            | 2.0090813516  | 3.5247539493  | 5.1405831106  |
| H47            | 2.7351411722  | 4.0560693891  | 3.6237949778  |
| H48            | 2.7927784205  | 2.3392763752  | 4.0800068444  |
| C49            | -0.0039275025 | 4.3047815823  | 3.3908768273  |
| H50            | -0.9660937602 | 4.1917776740  | 2.8814701473  |
| H51            | 0.5235140627  | 5.1400867288  | 2.9327847480  |
| H52            | -0.2247259839 | 4.5908018623  | 4.4270926137  |
| C53            | 0.0331840760  | 1.9719359917  | 4.2548102377  |
| H54            | 0.5765109018  | 1.0285113402  | 4.3333760327  |
| H55            | -0.9638712949 | 1.7683648324  | 3.8478301332  |
| H56            | -0.1087069572 | 2.3835718105  | 5.2621347720  |
| C57            | -1.5851017762 | 1.2496013547  | -1.2836661682 |
| C58            | -1.1652797388 | 0.9365223212  | 0.1785477229  |
| C59            | -0.1413583468 | -0.1846308732 | 0.1259015167  |
| C60            | -0.4306137408 | -1.4534759891 | -0.6621513453 |
| C61            | -0.8151367400 | -1.0544099335 | -2.1030508858 |
| C62            | -1.9574464861 | -0.0189454879 | -2.0759485575 |
| H63            | -0.7544965715 | 1.7548596732  | -1.7938801787 |
| H64            | -2.4279466391 | 1.9531526670  | -1.2834817662 |
| H65            | -2.0720867825 | 0.5965728958  | 0.7029025000  |
| H66            | 0.7109445466  | 0.2459809922  | -0.3873363838 |
| H67            | -1.3043830360 | -1.9719465553 | -0.2461423858 |
| H68            | 0.0586089829  | -0.6274080038 | -2.6153051598 |



|     |               |               |               |
|-----|---------------|---------------|---------------|
| H69 | -1.1183733159 | -1.9400391219 | -2.6768663945 |
| H70 | -2.8490581868 | -0.4804257813 | -1.6264342770 |
| H71 | -2.2379806385 | 0.2571785260  | -3.0996282091 |
| C72 | 0.8089548793  | -2.3905021189 | -0.5675363433 |
| H73 | 0.5471204147  | -3.4198782568 | -0.8409141660 |
| H74 | 1.5715743450  | -2.0435657640 | -1.2725320904 |
| C75 | -0.6330055144 | 2.2068596738  | 0.9331025091  |
| H76 | -1.2923079608 | 2.4031312704  | 1.7814633152  |
| H77 | -0.7176875389 | 3.0883940466  | 0.2884727080  |
| H78 | 2.5516667071  | 0.1903039062  | 0.0789790922  |

**15**

|     |               |               |               |
|-----|---------------|---------------|---------------|
| H1  | 0.1754217850  | -2.9962618007 | -1.2486170802 |
| Ir2 | 1.7328693709  | 0.0057352871  | 1.2783683692  |
| P3  | 1.4566433436  | 2.3172609939  | 1.3168601881  |
| P4  | 1.7488882918  | -2.1587470395 | 0.5426037774  |
| C5  | 2.0909166449  | 3.7524069250  | 2.3756489807  |
| C6  | 1.2827804558  | 3.7380669173  | 3.6906457852  |
| H7  | 1.3241101617  | 2.7571505179  | 4.1760615470  |
| H8  | 0.2318862377  | 4.0002205389  | 3.5320414627  |
| H9  | 1.7051105193  | 4.4744743289  | 4.3857114593  |
| C10 | 1.9299393326  | 5.1132439602  | 1.6741935464  |
| H11 | 2.2580182577  | 5.9175316669  | 2.3455529188  |
| H12 | 0.8888310416  | 5.3180814253  | 1.4031382802  |
| H13 | 2.5364023787  | 5.1770365055  | 0.7656862852  |
| C14 | 3.5749200964  | 3.4903025335  | 2.7034107224  |
| H15 | 4.2058625022  | 3.5223559943  | 1.8106914183  |
| H16 | 3.7084506644  | 2.5121844746  | 3.1753116987  |
| H17 | 3.9385729925  | 4.2602307207  | 3.3956936332  |
| C18 | 1.9428424682  | 2.3271433297  | -0.5165694786 |
| C19 | 1.2954465746  | 3.3497208666  | -1.4682259371 |
| H20 | 1.6816393026  | 4.3604554774  | -1.2957348278 |
| H21 | 0.2073515662  | 3.3876513654  | -1.3878450992 |
| H22 | 1.5369404144  | 3.0819124615  | -2.5050783339 |
| C23 | 3.4707368525  | 2.3778804347  | -0.7020497734 |
| H24 | 3.7232147383  | 2.1091478397  | -1.7362453993 |
| H25 | 3.9762092971  | 1.6745853132  | -0.0349373702 |
| H26 | 3.8679986357  | 3.3831486827  | -0.5236802799 |
| C27 | 1.4666527495  | 0.8674311158  | -0.7072332673 |
| H28 | 1.9788994924  | 0.3381822708  | -1.5116693086 |
| H29 | 2.5074227312  | -0.3483170734 | 2.6955409588  |
| C30 | 0.9657080994  | -3.5038860688 | 1.7025335014  |
| C31 | 0.0153639736  | -2.7708350682 | 2.6757115646  |
| H32 | -0.4341449199 | -3.5049847379 | 3.3579058875  |
| H33 | -0.7977144461 | -2.2509581118 | 2.1674799161  |
| H34 | 0.5588876543  | -2.0272815854 | 3.2638261026  |
| C35 | 2.0304531148  | -4.1888066782 | 2.5838759234  |
| H36 | 2.6350444465  | -3.4582655467 | 3.1282306683  |
| H37 | 2.6948589219  | -4.8471081800 | 2.0195664077  |
| H38 | 1.5179400949  | -4.8110724364 | 3.3286657916  |
| C39 | 0.1804517058  | -4.5839789455 | 0.9327943212  |
| H40 | 0.7964728977  | -5.1097316288 | 0.1971913499  |
| H41 | -0.6889301792 | -4.1714032564 | 0.4137913874  |
| H42 | -0.1939041498 | -5.3336598137 | 1.6419729393  |
| C43 | 3.4345653077  | -2.8116622690 | -0.1477349642 |
| C44 | 4.5049844783  | -2.8002527824 | 0.9670390764  |
| H45 | 5.4902401502  | -2.9768690726 | 0.5167250403  |
| H46 | 4.3524000393  | -3.5719138984 | 1.7205138583  |
| H47 | 4.5266710953  | -1.8296401240 | 1.4711279214  |
| C48 | 3.3326197763  | -4.2067210448 | -0.7932902383 |
| H49 | 2.5917289452  | -4.2321509603 | -1.6000775851 |
| H50 | 3.0746801181  | -4.9867040051 | -0.0725204205 |
| H51 | 4.3007844402  | -4.4799791170 | -1.2335140726 |
| C52 | 3.9290211262  | -1.8091835719 | -1.2157953213 |
| H53 | 3.9682676101  | -0.7943987662 | -0.8121958716 |
| H54 | 3.3154716219  | -1.8018415598 | -2.1213907975 |
| H55 | 4.9424610195  | -2.0958471895 | -1.5225597266 |
| C56 | -1.7027645738 | -1.3977626038 | -0.4395239314 |
| C57 | -0.3472088871 | -0.8888083326 | -0.9734713715 |
| C58 | 0.1884567160  | 0.3856287747  | -0.2654267095 |
| C59 | -0.8954043784 | 1.4133144594  | 0.1518235428  |

|     |               |               |               |
|-----|---------------|---------------|---------------|
| C60 | -2.1555936662 | 0.7580689749  | 0.7397058885  |
| C61 | -2.7312453643 | -0.2887498407 | -0.2147861209 |
| H62 | -1.5517058366 | -1.9191963820 | 0.5100208749  |
| H63 | -2.0903690214 | -2.1465189359 | -1.1430106782 |
| H64 | -0.5300844964 | -0.6005387511 | -2.0236205572 |
| H65 | -1.2222634442 | 1.9107987468  | -0.7765812538 |
| H66 | -1.9011916288 | 0.2858040593  | 1.6985715828  |
| H67 | -2.8966526746 | 1.5393929676  | 0.9537295019  |
| H68 | -2.9923803684 | 0.1876404088  | -1.1715022002 |
| H69 | -3.6601600320 | -0.7123341090 | 0.1867842353  |
| C70 | -0.3736421091 | 2.5228003569  | 1.1188203430  |
| H71 | -0.6521558938 | 3.5229214207  | 0.7668082075  |
| H72 | -0.8258419143 | 2.3894483139  | 2.1061984103  |
| C73 | 0.6809395790  | -2.0542192723 | -1.0158787940 |
| H74 | 1.3857356050  | -1.8866725587 | -1.8326781984 |

**Benzene**

|     |               |               |              |
|-----|---------------|---------------|--------------|
| C1  | 1.8266007311  | 0.0255336404  | 6.4277308727 |
| C2  | 2.9961751504  | 0.0115887594  | 5.6650073879 |
| C3  | 2.9200182716  | -0.0144397918 | 4.2709649078 |
| C4  | 1.6743899590  | -0.0248749549 | 3.6397095011 |
| C5  | 0.5049354489  | -0.0120592008 | 4.4023546736 |
| C6  | 0.5811815209  | 0.0139238684  | 5.7964360399 |
| H7  | 1.8854789915  | 0.0442229022  | 7.5125708034 |
| H8  | 3.9653513127  | 0.0196803475  | 6.1562687693 |
| H9  | 3.8299552035  | -0.0234512288 | 3.6772130006 |
| H10 | -0.4643023435 | -0.0193062859 | 3.9112532138 |
| H11 | -0.3288469149 | 0.0234458121  | 6.3901306432 |
| H12 | 1.6168689427  | -0.0447659531 | 2.5548614588 |

**2-anti**

|     |               |               |               |
|-----|---------------|---------------|---------------|
| H1  | 0.6073392239  | 0.0016213786  | 2.6446371347  |
| Tr2 | 1.6628995569  | 0.0018326614  | 1.5297897577  |
| P3  | 1.4411407687  | -2.3453969213 | 1.2791364422  |
| P4  | 1.4427501583  | 2.3499005468  | 1.2814550563  |
| C5  | 2.9548070204  | -3.1667316534 | 0.4219681288  |
| C6  | 3.4851708552  | -2.0975381332 | -0.5601896547 |
| H7  | 3.8246398707  | -1.2033570737 | -0.0279874066 |
| H8  | 2.7338302925  | -1.7947563919 | -1.2967997094 |
| H9  | 4.3462688961  | -2.4982405048 | -1.1105506542 |
| C10 | 2.6197397744  | -4.4394128744 | -0.3835069975 |
| H11 | 3.5331547959  | -4.7937420617 | -0.8786279806 |
| H12 | 1.8783079374  | -4.2606274796 | -1.1670257590 |
| H13 | 2.2558701432  | -5.2531878048 | 0.2458455389  |
| C14 | 4.0668946812  | -3.4895118263 | 1.4388077846  |
| H15 | 3.8060321882  | -4.3425809459 | 2.0713650281  |
| H16 | 4.2993011562  | -2.6360056952 | 2.0807236128  |
| H17 | 4.9815144228  | -3.7603984048 | 0.8955063581  |
| C18 | 0.8235003643  | -3.4168373538 | 2.7501213772  |
| C19 | 0.6913262571  | -4.9138531759 | 2.4060229902  |
| H20 | 1.6645150624  | -5.3922170360 | 2.2691545981  |
| H21 | 0.0883834479  | -5.0945627579 | 1.5105007137  |
| H22 | 0.1956535095  | -5.4272926590 | 3.2400962943  |
| C23 | 1.7483615839  | -3.2612563076 | 3.9732936841  |
| H24 | 1.3012792726  | -3.7917272220 | 4.8243224451  |
| H25 | 1.8821069843  | -2.2163532699 | 4.2535102748  |
| H26 | 2.7400466276  | -3.6870786417 | 3.8085658731  |
| C27 | -0.5738061769 | -2.8816020696 | 3.1372968996  |
| H28 | -0.9198475922 | -3.4119307323 | 4.0331841310  |
| H29 | -1.3176371074 | -3.0462217606 | 2.3523639301  |
| H30 | -0.5488691385 | -1.8132470335 | 3.3693071284  |
| C31 | 2.9574961678  | 3.1697492742  | 0.4246687234  |
| C32 | 3.4865985426  | 2.1000235925  | -0.5576043711 |
| H33 | 4.3483333732  | 2.4996490887  | -1.1077614248 |
| H34 | 2.7349963332  | 1.7983271413  | -1.2943964846 |
| H35 | 3.8248877039  | 1.2054080341  | -0.0253568533 |
| C36 | 4.0697622600  | 3.4904387144  | 1.4419330376  |
| H37 | 4.3007058112  | 2.6362209381  | 2.0834403946  |
| H38 | 3.8100169893  | 4.3436081015  | 2.0748155571  |
| H39 | 4.9849178539  | 3.7601866011  | 0.8989946688  |
| C40 | 2.6244142864  | 4.4432221565  | -0.3804180104 |

|     |               |               |               |
|-----|---------------|---------------|---------------|
| H41 | 2.2615725551  | 5.2573100911  | 0.2491441838  |
| H42 | 1.8828781369  | 4.2657628551  | -1.1641507404 |
| H43 | 3.5384390868  | 4.7963812185  | -0.8752506982 |
| C44 | 0.8265964097  | 3.4212842300  | 2.7531859897  |
| C45 | 1.7516230654  | 3.2640688166  | 3.9759624593  |
| H46 | 1.3049950453  | 3.7940372146  | 4.8275455123  |
| H47 | 2.7435214252  | 3.6894894658  | 3.8114177630  |
| H48 | 1.8848516120  | 2.2188421209  | 4.2552309382  |
| C49 | 0.6961651527  | 4.9185691579  | 2.4097560838  |
| H50 | 0.0939346178  | 5.1003315689  | 1.5139677072  |
| H51 | 1.6699269149  | 5.3959981995  | 2.2737130397  |
| H52 | 0.2005352306  | 5.4320732167  | 3.2437991729  |
| C53 | -0.5711312072 | 2.8871977919  | 3.1403481789  |
| H54 | -0.5471504407 | 1.8186401293  | 3.3716085439  |
| H55 | -1.3149675009 | 3.0530297047  | 2.3556704646  |
| H56 | -0.9164345268 | 3.4172436935  | 4.0366753076  |
| C57 | -1.7837560757 | 1.2775631523  | -1.1906238077 |
| C58 | -0.7813715200 | 1.2644459685  | -0.0163400729 |
| C59 | 0.1091487015  | 0.0033527914  | -0.0237990193 |
| C60 | -0.7820613071 | -1.2572913172 | -0.0176935950 |
| C61 | -1.7844788948 | -1.2686781786 | -1.1919492115 |
| C62 | -2.6458188394 | 0.0046962209  | -1.2048562263 |
| H63 | -1.2237197827 | 1.3498219567  | -2.1356851212 |
| H64 | -2.4303262249 | 2.1654084403  | -1.1419044213 |
| H65 | -1.3704773028 | 1.2454600980  | 0.9129370460  |
| H66 | 0.6463796165  | 0.0037231139  | -0.9975452864 |
| H67 | -1.3711859503 | -1.2389759312 | 0.9115759169  |
| H68 | -1.2245940469 | -1.3403646505 | -2.1371228770 |
| H69 | -2.4315625993 | -2.1561837242 | -1.1440273743 |
| H70 | -3.2997267534 | 0.0044299061  | -0.3203519006 |
| H71 | -3.3105569362 | 0.0053519701  | -2.0781542732 |
| C72 | 0.0919315764  | -2.5169691762 | -0.0096513670 |
| H73 | -0.4881161621 | -3.4374364012 | 0.1226611181  |
| H74 | 0.5875301873  | -2.5993676753 | -0.9842016214 |
| C75 | 0.0933607421  | 2.5236607973  | -0.0069741536 |
| H76 | -0.4861058177 | 3.4443386765  | 0.1264420287  |
| H77 | 0.5889351872  | 2.6068425754  | -0.9814842655 |
| C78 | 5.3880393363  | -0.0023258443 | 4.9283908311  |
| C79 | 4.0520669120  | -0.0007677470 | 5.3341936898  |
| C80 | 3.0229227916  | 0.0004382372  | 4.3880441830  |
| C81 | 3.2468198336  | 0.0002869288  | 2.9898328596  |
| C82 | 4.6162159917  | -0.0013299748 | 2.6286225624  |
| C83 | 5.6618866332  | -0.0026209211 | 3.5606974742  |
| H84 | 6.1933695372  | -0.0032792969 | 5.6584128982  |
| H85 | 3.8070278878  | -0.0005468480 | 6.3952899964  |
| H86 | 1.9982491937  | 0.0013801735  | 4.7591866380  |
| H87 | 4.8974903350  | -0.0017097160 | 1.5743265058  |
| H88 | 6.6934579247  | -0.0039327625 | 3.2118756777  |

**TS2-24 anti**

|     |               |               |               |
|-----|---------------|---------------|---------------|
| H1  | 2.1933883981  | -0.2916673698 | 3.0285122073  |
| Ir2 | 1.6731196574  | -0.0323927853 | 1.5180412778  |
| P3  | 1.3496210952  | -2.3668004532 | 1.3420291806  |
| P4  | 1.3748822552  | 2.3116364637  | 1.4303759415  |
| C5  | 2.7289681609  | -3.5065147620 | 0.6117962872  |
| C6  | 3.3175817937  | -2.7394202569 | -0.5959328344 |
| H7  | 3.6159430329  | -1.7224197821 | -0.3358414368 |
| H8  | 2.6034914629  | -2.6675628105 | -1.4224863650 |
| H9  | 4.1975982779  | -3.2765867014 | -0.9716697023 |
| C10 | 2.2268282798  | -4.8696940664 | 0.0876011176  |
| H11 | 3.0562430591  | -5.3745885492 | -0.4249895075 |
| H12 | 1.4151725566  | -4.7693650396 | -0.6384815785 |
| H13 | 1.8889189523  | -5.5333882178 | 0.8839784602  |
| C14 | 3.8430434113  | -3.7540178064 | 1.6475421349  |
| H15 | 3.5082424804  | -4.4125149292 | 2.4543398029  |
| H16 | 4.2138481429  | -2.8274544071 | 2.0913223467  |
| H17 | 4.6902209763  | -4.2519766153 | 1.1581779420  |
| C18 | 0.5967057755  | -3.1622354694 | 2.9278694297  |
| C19 | 0.3134034743  | -4.6724767447 | 2.8179820698  |
| H20 | 1.2314461293  | -5.2659775940 | 2.8247354418  |
| H21 | -0.2586409075 | -4.9322127867 | 1.9216902395  |

|              |               |               |               |
|--------------|---------------|---------------|---------------|
| H22          | -0.2800076407 | -4.9893591008 | 3.6856407727  |
| C23          | 1.5147931528  | -2.9155019809 | 4.1433564798  |
| H24          | 1.0523238217  | -3.3573148081 | 5.0356256627  |
| H25          | 1.6504820837  | -1.8483448320 | 4.3325234049  |
| H26          | 2.5034811292  | -3.3659108771 | 4.0298858838  |
| C27          | -0.7379527453 | -2.4278555610 | 3.1876690603  |
| H28          | -1.1315325539 | -2.7339076885 | 4.1654147827  |
| H29          | -1.4967725050 | -2.6721988938 | 2.4379534976  |
| H30          | -0.5937543195 | -1.3430424924 | 3.1957282805  |
| C31          | 2.8719677091  | 3.4283071878  | 0.9404927327  |
| C32          | 3.6884075777  | 2.6112284529  | -0.0866889015 |
| H33          | 4.5467259156  | 3.2095945659  | -0.4196617712 |
| H34          | 3.1015509149  | 2.3566103852  | -0.9755462273 |
| H35          | 4.0628903422  | 1.6830485031  | 0.3478909027  |
| C36          | 3.7764009607  | 3.7266303631  | 2.1516932311  |
| H37          | 4.0792513106  | 2.8159328231  | 2.6728823907  |
| H38          | 3.2963226087  | 4.3961140616  | 2.8717264370  |
| H39          | 4.6875070613  | 4.2302821124  | 1.8035117546  |
| C40          | 2.4662439869  | 4.7603038608  | 0.2723664116  |
| H41          | 1.9196477099  | 5.4257940221  | 0.9417244113  |
| H42          | 1.8604198657  | 4.6105515724  | -0.6255772764 |
| H43          | 3.3770012597  | 5.2885164692  | -0.0386616864 |
| C44          | 0.4137424003  | 3.1086512569  | 2.9023924020  |
| C45          | 1.1102158755  | 2.7614927376  | 4.2319152089  |
| H46          | 0.5549283146  | 3.2205510284  | 5.0605717412  |
| H47          | 2.1404579229  | 3.1196354108  | 4.2846006045  |
| H48          | 1.1144603370  | 1.6798680645  | 4.3860409275  |
| C49          | 0.2408976716  | 4.6357409512  | 2.7985803004  |
| H50          | -0.2066861727 | 4.9434347013  | 1.8481800680  |
| H51          | 1.1836739392  | 5.1734311079  | 2.9261593786  |
| H52          | -0.4332675806 | 4.9723275822  | 3.5972643664  |
| C53          | -0.9910871671 | 2.4682495816  | 2.9457828332  |
| H54          | -0.9307391239 | 1.3760394093  | 2.9293994746  |
| H55          | -1.6233671436 | 2.7974134145  | 2.1164914876  |
| H56          | -1.4898706125 | 2.7702092251  | 3.8757433940  |
| C57          | -1.4210308881 | 1.3058081891  | -1.5275105997 |
| C58          | -0.6290762457 | 1.2832836952  | -0.2029467474 |
| C59          | 0.2224616524  | -0.0024250313 | -0.0630464030 |
| C60          | -0.7351125796 | -1.2189344147 | -0.1300350907 |
| C61          | -1.5601810253 | -1.2289367172 | -1.4372730320 |
| C62          | -2.3389352422 | 0.0791663740  | -1.6401311807 |
| H63          | -0.7123037862 | 1.3169687868  | -2.3696335478 |
| H64          | -2.0163772669 | 2.2263761991  | -1.6066197791 |
| H65          | -1.3727002200 | 1.2680764864  | 0.6043201102  |
| H66          | 0.8804510252  | -0.0519320134 | -0.9574507600 |
| H67          | -1.4438680283 | -1.1188916902 | 0.7048180830  |
| H68          | -0.8713531917 | -1.3766632471 | -2.2831778839 |
| H69          | -2.2532452668 | -2.0821069946 | -1.4471537595 |
| H70          | -3.1274187718 | 0.1512261805  | -0.8767452372 |
| H71          | -2.8505754037 | 0.0696647103  | -2.6111226759 |
| C72          | 0.0202699855  | -2.5407133630 | 0.0415443660  |
| H73          | -0.6521121754 | -3.3814174091 | 0.2480307880  |
| H74          | 0.5316750181  | -2.7775537084 | -0.8981936788 |
| C75          | 0.2340873416  | 2.5356597241  | -0.0323202137 |
| H76          | -0.3635821930 | 3.4520004671  | 0.0411155746  |
| H77          | 0.8752443414  | 2.6472446770  | -0.9154500349 |
| C78          | 6.2258682759  | 0.3189180749  | 3.8091803621  |
| C79          | 5.1321643406  | 0.6382439402  | 4.6108814002  |
| C80          | 3.8297436395  | 0.5060844472  | 4.1179578190  |
| C81          | 3.5595374093  | 0.0513837098  | 2.8106089698  |
| C82          | 4.6869352848  | -0.2950810511 | 2.0338632087  |
| C83          | 5.9899929890  | -0.1492850604 | 2.5143471056  |
| H84          | 7.2399328737  | 0.4241201292  | 4.1848913505  |
| H85          | 5.2839036833  | 0.9937602905  | 5.6276446327  |
| H86          | 3.0050518592  | 0.7601807514  | 4.7770459373  |
| H87          | 4.5508388410  | -0.6590565114 | 1.0230842336  |
| H88          | 6.8261471342  | -0.4062871034 | 1.8675285378  |
| <b>2-syn</b> |               |               |               |
| H1           | 2.6531774036  | 0.0095712521  | 0.8745802826  |
| Ir2          | 1.3724115770  | 0.0051240834  | 1.7157595069  |

|     |               |               |                |
|-----|---------------|---------------|----------------|
| P3  | 1.1730984097  | -2.3327699182 | 1.4476834033   |
| P4  | 1.1655160720  | 2.3442734271  | 1.4494772283   |
| C5  | 2.7406665574  | -3.4313101431 | 1.2486436561   |
| C6  | 3.6057764379  | -2.7846922206 | 0.1414224552   |
| H7  | 3.8954908016  | -1.7650893382 | 0.4075880809   |
| H8  | 3.1110817897  | -2.7556224484 | -0.83324445496 |
| H9  | 4.5219692336  | -3.3758265857 | 0.0231563317   |
| C10 | 2.3898299751  | -4.8736920319 | 0.8325016475   |
| H11 | 3.3158838476  | -5.4285450013 | 0.6334518358   |
| H12 | 1.7835172752  | -4.9128912867 | -0.0780600550  |
| H13 | 1.8575127602  | -5.4105651546 | 1.6227944214   |
| C14 | 3.5981703098  | -3.4570743650 | 2.5311656564   |
| H15 | 3.1464431010  | -4.0462608438 | 3.3295066257   |
| H16 | 3.7897196584  | -2.4533719757 | 2.9153533931   |
| H17 | 4.5650864173  | -3.9205803638 | 2.2964187099   |
| C18 | -0.0668806019 | -3.1074009608 | 2.7117842557   |
| C19 | -0.8984613965 | -4.2727236388 | 2.1405201257   |
| H20 | -0.2805484570 | -5.0939083304 | 1.7685973522   |
| H21 | -1.5605646951 | -3.9511759595 | 1.3314534004   |
| H22 | -1.5360229096 | -4.6779118028 | 2.9369466999   |
| C23 | 0.6500071140  | -3.5760642204 | 3.9937524928   |
| H24 | -0.1041924915 | -3.7904934366 | 4.7622016939   |
| H25 | 1.3227213405  | -2.8123980174 | 4.3933489817   |
| H26 | 1.2157171650  | -4.4978441768 | 3.8355660588   |
| C27 | -1.0342008247 | -1.9698505921 | 3.1097659746   |
| H28 | -1.7683085272 | -2.3496632016 | 3.8327045658   |
| H29 | -1.5877174718 | -1.5705337869 | 2.2559607975   |
| H30 | -0.4970762348 | -1.1489004218 | 3.5940304129   |
| C31 | 2.7333945993  | 3.4418353190  | 1.2387436025   |
| C32 | 3.5810383214  | 2.8085470551  | 0.1105532016   |
| H33 | 4.5037200802  | 3.3905393107  | -0.0023850097  |
| H34 | 3.0779182927  | 2.8085099569  | -0.8602120008  |
| H35 | 3.8600061425  | 1.7795305266  | 0.3507701371   |
| C36 | 3.6090343465  | 3.4470237096  | 2.5092127118   |
| H37 | 3.8093394790  | 2.4369805261  | 2.8714951421   |
| H38 | 3.1665594876  | 4.0181570034  | 3.3255797625   |
| H39 | 4.5706740551  | 3.9189519198  | 2.2697100725   |
| C40 | 2.3830433323  | 4.8910769664  | 0.8465990532   |
| H41 | 1.8718661291  | 5.4227492708  | 1.6540684517   |
| H42 | 1.7576397357  | 4.9444321150  | -0.0502992034  |
| H43 | 3.3083853810  | 5.4420348632  | 0.6337028998   |
| C44 | -0.0622571731 | 3.1262797810  | 2.7207440776   |
| C45 | 0.6659383577  | 3.5908284800  | 3.9979548047   |
| H46 | -0.0819674853 | 3.8100691010  | 4.7711954609   |
| H47 | 1.2360928867  | 4.5092361614  | 3.8362478727   |
| H48 | 1.3368694393  | 2.8232443033  | 4.3931548208   |
| C49 | -0.8897603859 | 4.2971103973  | 2.1542614988   |
| H50 | -1.5594583485 | 3.9796836190  | 1.3498259472   |
| H51 | -0.2693536951 | 5.1142066383  | 1.7779823435   |
| H52 | -1.5193683671 | 4.7066172547  | 2.9547939954   |
| C53 | -1.0354010994 | 1.9961193485  | 3.1249341356   |
| H54 | -0.5022185260 | 1.1720671048  | 3.6079892475   |
| H55 | -1.5953987020 | 1.5993855260  | 2.2740634729   |
| H56 | -1.7637619752 | 2.3827458057  | 3.8500641553   |
| C57 | -1.1455256495 | 1.2744973583  | -1.8983613803  |
| C58 | -0.5474199658 | 1.2672801713  | -0.4750835767  |
| C59 | 0.2986066293  | 0.0036661481  | -0.2150519679  |
| C60 | -0.5352380068 | -1.2667952657 | -0.4837682792  |
| C61 | -1.1281275068 | -1.2746253540 | -1.9094757675  |
| C62 | -1.9532297122 | -0.0044505177 | -2.1755293552  |
| H63 | -0.3237460505 | 1.3513005097  | -2.6264881750  |
| H64 | -1.7821272772 | 2.1577133282  | -2.0507966240  |
| H65 | -1.3990506294 | 1.2656213518  | 0.2246981182   |
| H66 | 1.0945535242  | 0.0097075123  | -0.9837957320  |
| H67 | -1.3903197000 | -1.2747537142 | 0.2117183899   |
| H68 | -0.3035000917 | -1.3338918830 | -2.6359193731  |
| H69 | -1.7520280889 | -2.1655046508 | -2.0692663506  |
| H70 | -2.8441088279 | -0.0135363569 | -1.5299933441  |
| H71 | -2.3236814663 | -0.0017029131 | -3.2085219322  |
| C72 | 0.3200139883  | -2.5123748718 | -0.2117425659  |
| H73 | -0.2472042177 | -3.4441306427 | -0.2933192760  |

|     |               |               |               |
|-----|---------------|---------------|---------------|
| H74 | 1.1107852408  | -2.5588719797 | -0.9688323549 |
| C75 | 0.2992532189  | 2.5197665135  | -0.2041395505 |
| H76 | -0.2756944306 | 3.4472462203  | -0.2806134801 |
| H77 | 1.0849662401  | 2.5741399055  | -0.9658299677 |
| C78 | 4.0826425243  | 0.0037278565  | 5.9657892901  |
| C79 | 4.6951031483  | -0.0000401208 | 4.7109285604  |
| C80 | 3.9234679887  | 0.0004544035  | 3.5444031288  |
| C81 | 2.5059581239  | 0.0048251446  | 3.5457269155  |
| C82 | 1.9326642982  | 0.0087819293  | 4.8403683176  |
| C83 | 2.6888621243  | 0.0081746838  | 6.0194554597  |
| H84 | 4.6760654795  | 0.0032610609  | 6.8764608169  |
| H85 | 5.7816054285  | -0.0035135024 | 4.6369405817  |
| H86 | 4.4505887160  | -0.0027007319 | 2.5907063816  |
| H87 | 0.8475207202  | 0.0125990574  | 4.9525901624  |
| H88 | 2.1817580601  | 0.0113374126  | 6.9831847308  |

**TS2-24 syn**

|     |               |               |               |
|-----|---------------|---------------|---------------|
| H1  | 2.7894061261  | -0.3606342648 | 2.3589179466  |
| Ir2 | 1.3611406920  | -0.0379083643 | 1.7072195258  |
| P3  | 1.1789717554  | -2.3632382194 | 1.3846819619  |
| P4  | 1.2499576402  | 2.3317813357  | 1.4451405113  |
| C5  | 2.8540275852  | -3.2615345377 | 1.0449849322  |
| C6  | 3.5389528899  | -2.4877738823 | -0.1073033190 |
| H7  | 3.5703135115  | -1.4137605832 | 0.1000572110  |
| H8  | 3.0392506204  | -2.6347684604 | -1.0691882154 |
| H9  | 4.5678484540  | -2.8526517472 | -0.2179350556 |
| C10 | 2.6936300314  | -4.7359079061 | 0.6276417109  |
| H11 | 3.6628797459  | -5.1248094449 | 0.2887291930  |
| H12 | 1.9852180828  | -4.8619319537 | -0.1975298791 |
| H13 | 2.3691549639  | -5.3674415831 | 1.4593423543  |
| C14 | 3.7934089556  | -3.1802874703 | 2.2679249972  |
| H15 | 3.4257127303  | -3.7426652059 | 3.1271845739  |
| H16 | 3.9616655684  | -2.1498101834 | 2.5892906806  |
| H17 | 4.7677802543  | -3.6048204608 | 1.9933245611  |
| C18 | 0.0904177102  | -3.4069385226 | 2.6050968884  |
| C19 | -0.4908363957 | -4.7012952988 | 1.9980212834  |
| H20 | 0.2758312498  | -5.3867524772 | 1.6324048320  |
| H21 | -1.1890722254 | -4.5020310819 | 1.1807217441  |
| H22 | -1.0558636067 | -5.2297982203 | 2.7770515784  |
| C23 | 0.8891386717  | -3.7835044054 | 3.8704223257  |
| H24 | 0.1955413998  | -4.1644083711 | 4.6312345704  |
| H25 | 1.4215739147  | -2.9342745649 | 4.3036193412  |
| H26 | 1.6122032372  | -4.5794840073 | 3.6720032972  |
| C27 | -1.1016747285 | -2.5108603996 | 3.0134807891  |
| H28 | -1.6754475781 | -3.0094302640 | 3.8055197172  |
| H29 | -1.7823553319 | -2.3383589868 | 2.1750003790  |
| H30 | -0.7771395372 | -1.5337533386 | 3.3777933394  |
| C31 | 2.8513607027  | 3.2855115714  | 0.9364864349  |
| C32 | 3.6936103314  | 2.2905017194  | 0.1076930612  |
| H33 | 4.6142339663  | 2.7859131771  | -0.2283044827 |
| H34 | 3.1596657745  | 1.9414070222  | -0.7824914729 |
| H35 | 3.9607755249  | 1.4067453505  | 0.6924171522  |
| C36 | 3.6743579100  | 3.7267397583  | 2.1628570320  |
| H37 | 3.8272634369  | 2.9166036043  | 2.8776036072  |
| H38 | 3.2085457121  | 4.5638712657  | 2.6901590916  |
| H39 | 4.6618910288  | 4.0682649558  | 1.8264702940  |
| C40 | 2.5817182909  | 4.5315878396  | 0.0642638473  |
| H41 | 1.9723805255  | 5.2814455235  | 0.5720740856  |
| H42 | 2.0960021841  | 4.2860143859  | -0.8833931450 |
| H43 | 3.5427526756  | 5.0025090012  | -0.1802609519 |
| C44 | 0.2938685006  | 3.3316333379  | 2.7904565021  |
| C45 | 0.9643028125  | 3.1921427537  | 4.1721153708  |
| H46 | 0.3494779089  | 3.7173756367  | 4.9149508273  |
| H47 | 1.9619917480  | 3.6326257791  | 4.2080013001  |
| H48 | 1.0448817001  | 2.1491760406  | 4.4788337331  |
| C49 | 0.1295168601  | 4.8290425411  | 2.4652040154  |
| H50 | -0.3053707419 | 5.0053164570  | 1.4764023762  |
| H51 | 1.0763201517  | 5.3723123626  | 2.5264798506  |
| H52 | -0.5478859086 | 5.2811442455  | 3.2016438928  |
| C53 | -1.1090029427 | 2.6905370189  | 2.8869234657  |
| H54 | -1.0419889532 | 1.6085295428  | 3.0402195480  |

|     |               |               |               |
|-----|---------------|---------------|---------------|
| H55 | -1.7145481347 | 2.8774872089  | 1.9953979063  |
| H56 | -1.6427360454 | 3.1235873786  | 3.7424743592  |
| C57 | -1.3878072339 | 1.3087067551  | -1.6571907796 |
| C58 | -0.6901299182 | 1.2752894965  | -0.2795170534 |
| C59 | 0.1749818767  | 0.0094152196  | -0.0930110917 |
| C60 | -0.6497469942 | -1.2659380251 | -0.3813281215 |
| C61 | -1.3309437448 | -1.2227348568 | -1.7645420224 |
| C62 | -2.2017973797 | 0.0329259847  | -1.9166928494 |
| H63 | -0.6202232660 | 1.4116595687  | -2.4396484124 |
| H64 | -2.0356418771 | 2.1930484149  | -1.7365109769 |
| H65 | -1.4807619575 | 1.2667624776  | 0.4843322191  |
| H66 | 0.9597566104  | 0.0530214170  | -0.8742124280 |
| H67 | -1.4541412577 | -1.3299411196 | 0.3665570708  |
| H68 | -0.5544936887 | -1.2251654633 | -2.5448780867 |
| H69 | -1.9378040057 | -2.1252569365 | -1.9231324408 |
| H70 | -3.0362995827 | -0.0172852849 | -1.2016695639 |
| H71 | -2.6536559487 | 0.0664406309  | -2.9162223752 |
| C72 | 0.2541674554  | -2.4973629902 | -0.2348754625 |
| H73 | -0.2928087775 | -3.4389764650 | -0.3333342621 |
| H74 | 0.9980563494  | -2.4785043935 | -1.0385558448 |
| C75 | 0.1821962643  | 2.5200362176  | -0.0802880046 |
| H76 | -0.3988242291 | 3.4488423697  | -0.0684443246 |
| H77 | 0.8671085952  | 2.5904200521  | -0.9332028282 |
| C78 | 3.3380510786  | 0.3010606622  | 6.3986826123  |
| C79 | 4.1590399159  | 0.6918254260  | 5.3433786162  |
| C80 | 3.7187420037  | 0.5580612923  | 4.0234009627  |
| C81 | 2.4468042552  | 0.0406556148  | 3.6982568707  |
| C82 | 1.6516290463  | -0.3759705388 | 4.7879383824  |
| C83 | 2.0806803067  | -0.2347918302 | 6.1094618286  |
| H84 | 3.6723110693  | 0.4025141373  | 7.4277910529  |
| H85 | 5.1486762797  | 1.0979664428  | 5.5410872414  |
| H86 | 4.3935073352  | 0.8485832751  | 3.2211900581  |
| H87 | 0.6642934802  | -0.7834078856 | 4.6072501533  |
| H88 | 1.4242932365  | -0.5459787584 | 6.9195410891  |

#### 24

|     |               |               |               |
|-----|---------------|---------------|---------------|
| H1  | -0.8906358847 | -0.0049204421 | 1.3736044635  |
| Ir2 | 1.6727678617  | 0.0000925251  | 1.0616322014  |
| P3  | 1.4849355451  | 2.3091805478  | 0.9838761064  |
| P4  | 1.4865763307  | -2.3087685372 | 0.9811630736  |
| C5  | 1.4665835158  | 3.2619621620  | 2.6573966646  |
| C6  | 0.6535142513  | 2.3778084960  | 3.6305378164  |
| H7  | 1.0755889328  | 1.3706280548  | 3.6931190722  |
| H8  | -0.3929031016 | 2.2779905735  | 3.3236546729  |
| H9  | 0.6609272645  | 2.8350541091  | 4.6288142485  |
| C10 | 0.8042727281  | 4.6535103051  | 2.5994874149  |
| H11 | 0.7408277472  | 5.0640249271  | 3.6158101175  |
| H12 | -0.2163175151 | 4.6090160591  | 2.2072655558  |
| H13 | 1.3662076039  | 5.3677995861  | 1.9957183013  |
| C14 | 2.8969284673  | 3.3913241534  | 3.2160422830  |
| H15 | 3.5068246281  | 4.0955582482  | 2.6427711011  |
| H16 | 3.4112176614  | 2.4243417089  | 3.2347919100  |
| H17 | 2.8547547884  | 3.7642815475  | 4.2475757288  |
| C18 | 2.6360888261  | 3.1897820185  | -0.2784329869 |
| C19 | 2.5404695997  | 4.7250357932  | -0.3074707850 |
| H20 | 2.9430550479  | 5.1836250294  | 0.5998223369  |
| H21 | 1.5115223229  | 5.0754992162  | -0.4416713371 |
| H22 | 3.1280180577  | 5.1108265598  | -1.1512352388 |
| C23 | 4.0909906694  | 2.7592968960  | 0.0048746625  |
| H24 | 4.7512924928  | 3.1679240537  | -0.7712037401 |
| H25 | 4.1779972540  | 1.6678529485  | -0.0125693220 |
| H26 | 4.4590475260  | 3.1163774247  | 0.9698155686  |
| C27 | 2.2551048609  | 2.6417733779  | -1.6711857458 |
| H28 | 2.9898503078  | 2.9901788533  | -2.4082924503 |
| H29 | 1.2713591569  | 2.9912227225  | -1.9999228113 |
| H30 | 2.2564591142  | 1.5469750088  | -1.6740914625 |
| C31 | 1.4570556210  | -3.2583164324 | 2.6555624003  |
| C32 | 0.6338571380  | -2.3757485345 | 3.6212332965  |
| H33 | 0.6360108732  | -2.8314634968 | 4.6202320076  |
| H34 | -0.4107726754 | -2.2807686763 | 3.3067685030  |
| H35 | 1.0515941763  | -1.3668453634 | 3.6850180403  |

|     |               |               |               |
|-----|---------------|---------------|---------------|
| C36 | 2.8836225273  | -3.3834250683 | 3.2247668752  |
| H37 | 3.3955874504  | -2.4152737334 | 3.2458061354  |
| H38 | 3.4990588674  | -4.0870584807 | 2.6566729435  |
| H39 | 2.8351470309  | -3.7552865020 | 4.2564079188  |
| C40 | 0.8002040121  | -4.6523516252 | 2.5938386075  |
| H41 | 1.3704741080  | -5.3654221441 | 1.9963743311  |
| H42 | -0.2168307130 | -4.6125609977 | 2.1919879773  |
| H43 | 0.7288810416  | -5.0617577944 | 3.6100851133  |
| C44 | 2.6458118711  | -3.1899041947 | -0.2739019273 |
| C45 | 4.0992488458  | -2.7609168557 | 0.0190007490  |
| H46 | 4.7640024051  | -3.1682947727 | -0.7539652299 |
| H47 | 4.4612581700  | -3.1203687585 | 0.9853525290  |
| H48 | 4.1872171004  | -1.6694985705 | 0.0044001247  |
| C49 | 2.5495610774  | -4.7251747955 | -0.3047623190 |
| H50 | 1.5211780599  | -5.0751861455 | -0.4443916013 |
| H51 | 2.9474489416  | -5.1846642685 | 0.6041699434  |
| H52 | 3.1412434288  | -5.1105519118 | -1.1458685014 |
| C53 | 2.2736410089  | -2.6402530875 | -1.6685208733 |
| H54 | 2.2747851621  | -1.5454337314 | -1.6701830055 |
| H55 | 1.2920527678  | -2.9893828673 | -2.0039962488 |
| H56 | 3.0131239362  | -2.9877294252 | -2.4013330126 |
| C57 | -2.2064242849 | -1.2713473341 | -0.6943165576 |
| C58 | -0.6941156644 | -1.2611156977 | -0.3808294111 |
| C59 | -0.3024244470 | -0.0013115532 | 0.4338882832  |
| C60 | -0.6983675887 | 1.2616031385  | -0.3736254312 |
| C61 | -2.2110447732 | 1.2688575178  | -0.6852964098 |
| C62 | -2.6379374952 | 0.0005982228  | -1.4398025865 |
| H63 | -2.7658291662 | -1.3509720238 | 0.2499952590  |
| H64 | -2.4646496447 | -2.1607896396 | -1.2856488516 |
| H65 | -0.1627039462 | -1.2035089144 | -1.3408243501 |
| H66 | -0.1684619398 | 1.2101633501  | -1.3347390324 |
| H67 | -2.7699348086 | 1.3393676806  | 0.2600427489  |
| H68 | -2.4732771884 | 2.1614791376  | -1.2700112520 |
| H69 | -2.1790414970 | 0.0050419499  | -2.4390275671 |
| H70 | -3.7237912621 | -0.0009105705 | -1.5990502305 |
| C71 | -0.2557131981 | 2.5485143966  | 0.3430724105  |
| H72 | -0.3525023162 | 3.4313205875  | -0.2995388036 |
| H73 | -0.9035022736 | 2.7175638305  | 1.2114454998  |
| C74 | -0.2498381399 | -2.5506743794 | 0.3300662024  |
| H75 | -0.3397609752 | -3.4298604554 | -0.3184604570 |
| H76 | -0.9015771238 | -2.7279049006 | 1.1937854212  |

16

|     |               |               |               |
|-----|---------------|---------------|---------------|
| C1  | -0.0322269795 | 0.0005399502  | 0.0699854009  |
| Tr2 | 1.5330792108  | 0.0006397439  | 1.1322819207  |
| P3  | 1.4463208724  | 2.3378263495  | 0.9815311774  |
| P4  | 1.4484121051  | -2.3366806079 | 0.9800112843  |
| C5  | 1.3753898921  | 3.3668889261  | 2.5993615039  |
| C6  | 0.5939545057  | 2.5031477137  | 3.6159645856  |
| H7  | 1.1108151532  | 1.5615276023  | 3.8144605466  |
| H8  | -0.4190486144 | 2.2670975407  | 3.2727741560  |
| H9  | 0.5027302962  | 3.0575033740  | 4.5590668867  |
| C10 | 0.6477512307  | 4.7183224447  | 2.4383374005  |
| H11 | 0.6098186509  | 5.2160103694  | 3.4156842241  |
| H12 | -0.3857914428 | 4.6013216237  | 2.0986514231  |
| H13 | 1.1557670864  | 5.3952701426  | 1.7489619392  |
| C14 | 2.7899991422  | 3.6072085306  | 3.1642508920  |
| H15 | 3.3631108040  | 4.3163420297  | 2.5599274341  |
| H16 | 3.3538993293  | 2.6744927637  | 3.2468174388  |
| H17 | 2.6999940922  | 4.0397483242  | 4.1689110882  |
| C18 | 2.6758363032  | 3.1049416097  | -0.2756798951 |
| C19 | 2.5723382729  | 4.6360961039  | -0.4040936908 |
| H20 | 2.9100768640  | 5.1519487044  | 0.4980789950  |
| H21 | 1.5542198992  | 4.9702186660  | -0.6315826992 |
| H22 | 3.2154020619  | 4.9716584600  | -1.2281463340 |
| C23 | 4.1184674134  | 2.7071818819  | 0.1009968665  |
| H24 | 4.8007850595  | 3.0505475007  | -0.6875267177 |
| H25 | 4.2207365056  | 1.6241430859  | 0.2015878858  |
| H26 | 4.4466513384  | 3.1555599628  | 1.0404218070  |
| C27 | 2.3556328301  | 2.4746105966  | -1.6492465148 |
| H28 | 3.1191872960  | 2.7881915759  | -2.3717755262 |



|      |               |               |               |
|------|---------------|---------------|---------------|
| H29  | 1.3856380016  | 2.7988020432  | -2.0400971266 |
| H30  | 2.3635399701  | 1.3820777506  | -1.5962222940 |
| C31  | 1.3724849876  | -3.3655314553 | 2.5980293915  |
| C32  | 0.5880462526  | -2.5014081420 | 3.6119857440  |
| H33  | 0.4945199130  | -3.0551605839 | 4.5552126354  |
| H34  | -0.4240853561 | -2.2659202460 | 3.2658772112  |
| H35  | 1.1040481571  | -1.5594438075 | 3.8111676099  |
| C36  | 2.7856074779  | -3.6054422377 | 3.1669164447  |
| H37  | 3.3494331856  | -2.6726778276 | 3.2498860415  |
| H38  | 3.3601338752  | -4.3153093970 | 2.5647396633  |
| H39  | 2.6929480060  | -4.0368779740 | 4.1718018878  |
| C40  | 0.6456426950  | -4.7172244346 | 2.4355647363  |
| H41  | 1.1556768899  | -5.3942511911 | 1.7477350260  |
| H42  | -0.3870542492 | -4.6006529625 | 2.0932001362  |
| H43  | 0.6053962274  | -5.2144995586 | 3.4130226745  |
| C44  | 2.6820793838  | -3.1043058047 | -0.2729798385 |
| C45  | 4.1237310317  | -2.7075818411 | 0.1083700662  |
| H46  | 4.8082829741  | -3.0510328134 | -0.6781576842 |
| H47  | 4.4486496122  | -3.1567506696 | 1.0485969597  |
| H48  | 4.2263971561  | -1.6246836978 | 0.2099486496  |
| C49  | 2.5781832558  | -4.6354600156 | -0.4013537674 |
| H50  | 1.5607004323  | -4.9692386141 | -0.6321766499 |
| H51  | 2.9125824109  | -5.1511421471 | 0.5022185793  |
| H52  | 3.2239467912  | -4.9716193114 | -1.2230286535 |
| C53  | 2.3664139130  | -2.4736997419 | -1.6474650346 |
| H54  | 2.3751952268  | -1.3811773172 | -1.5943437940 |
| H55  | 1.3972096424  | -2.7968425097 | -2.0411026092 |
| H56  | 3.1317162574  | -2.7879898384 | -2.3678224883 |
| C57  | -2.2358966901 | -1.2468040150 | -0.5500069377 |
| C58  | -0.6894312993 | -1.2789334287 | -0.4892293451 |
| C59  | -0.6929791456 | 1.2802341954  | -0.4845551085 |
| C60  | -2.2393663626 | 1.2443237677  | -0.5434521685 |
| C61  | -2.7673896659 | -0.0001237486 | -1.2547171150 |
| H62  | -2.6290251859 | -1.2753049793 | 0.4766005854  |
| H63  | -2.5919862026 | -2.1592351785 | -1.0449993990 |
| H64  | -0.3368839519 | -1.3220978799 | -1.5343093588 |
| H65  | -0.3424287605 | 1.3271949186  | -1.5301397360 |
| H66  | -2.6315043443 | 1.2661613613  | 0.4836955166  |
| H67  | -2.5985380437 | 2.1583459751  | -1.0332649976 |
| H68  | -2.4457084184 | 0.0031950686  | -2.3062314772 |
| H69  | -3.8642133721 | -0.0017574361 | -1.2624540593 |
| C70  | -0.2412245349 | 2.5642718042  | 0.2372471681  |
| H71  | -0.3118885684 | 3.4410924100  | -0.4155318097 |
| H72  | -0.9202600908 | 2.7439268436  | 1.0774509994  |
| C73  | -0.2363639074 | -2.5639115432 | 0.2299976212  |
| H74  | -0.3035231889 | -3.4392468114 | -0.4250804730 |
| H75  | -0.9171523385 | -2.7468078721 | 1.0678115814  |
| C176 | 3.5178435597  | 0.0006502446  | 2.6068652588  |

### 3. NMR Spectra of 3, 5, 6, 7, and 21

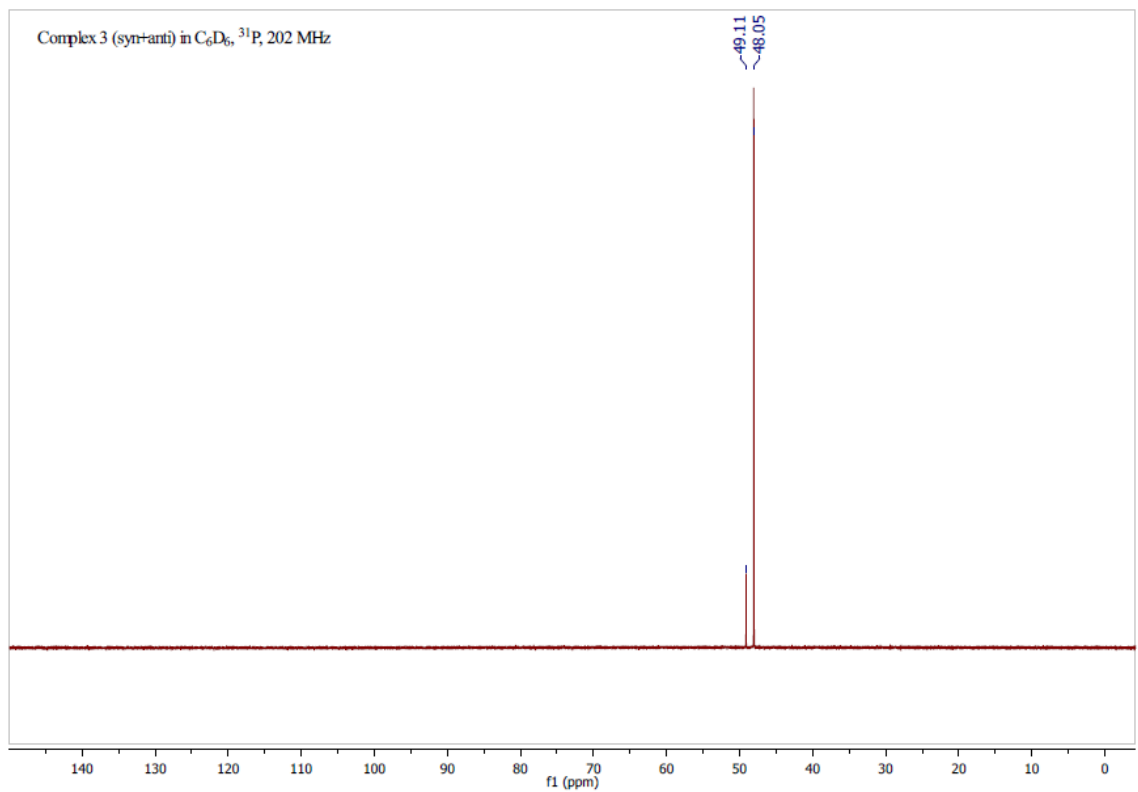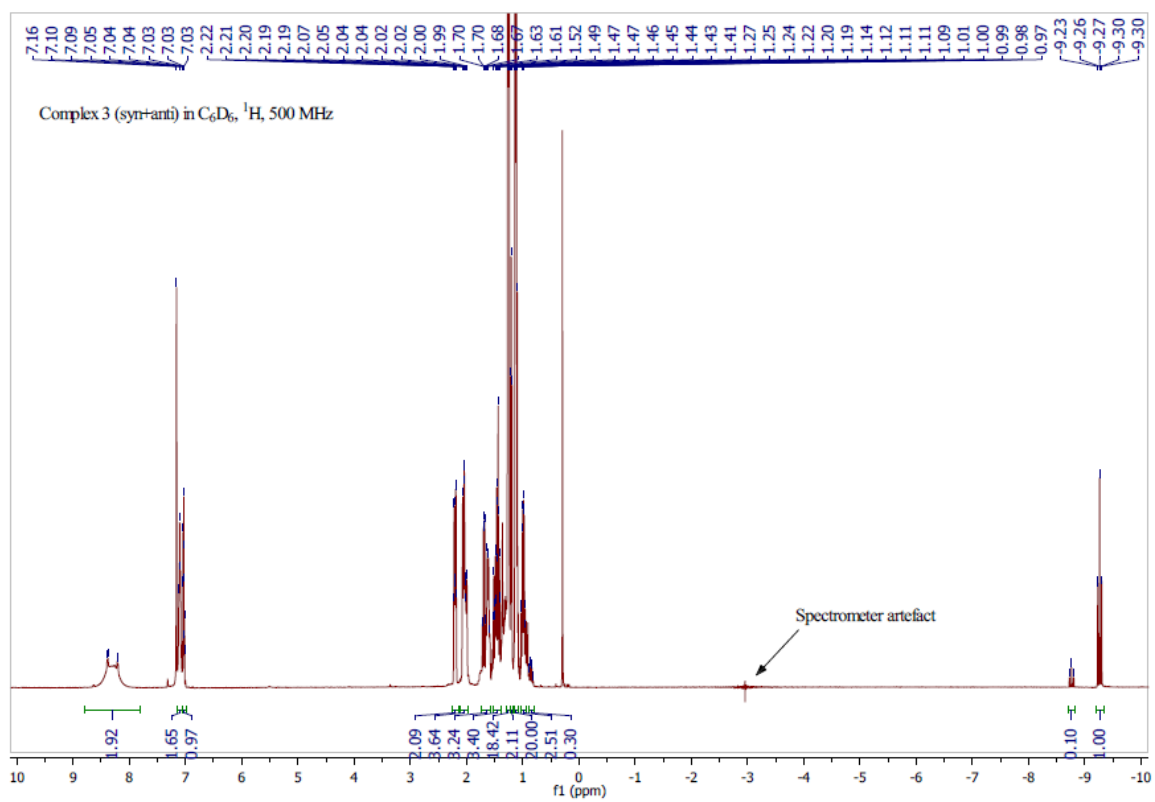

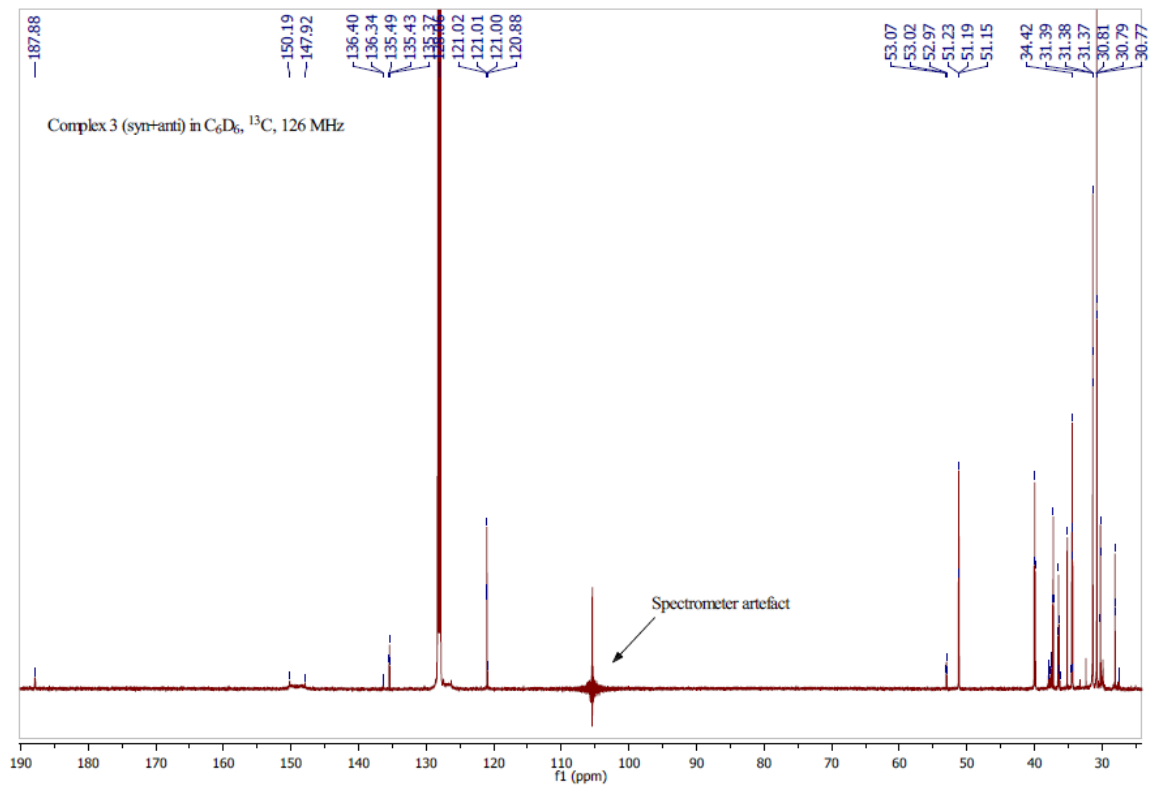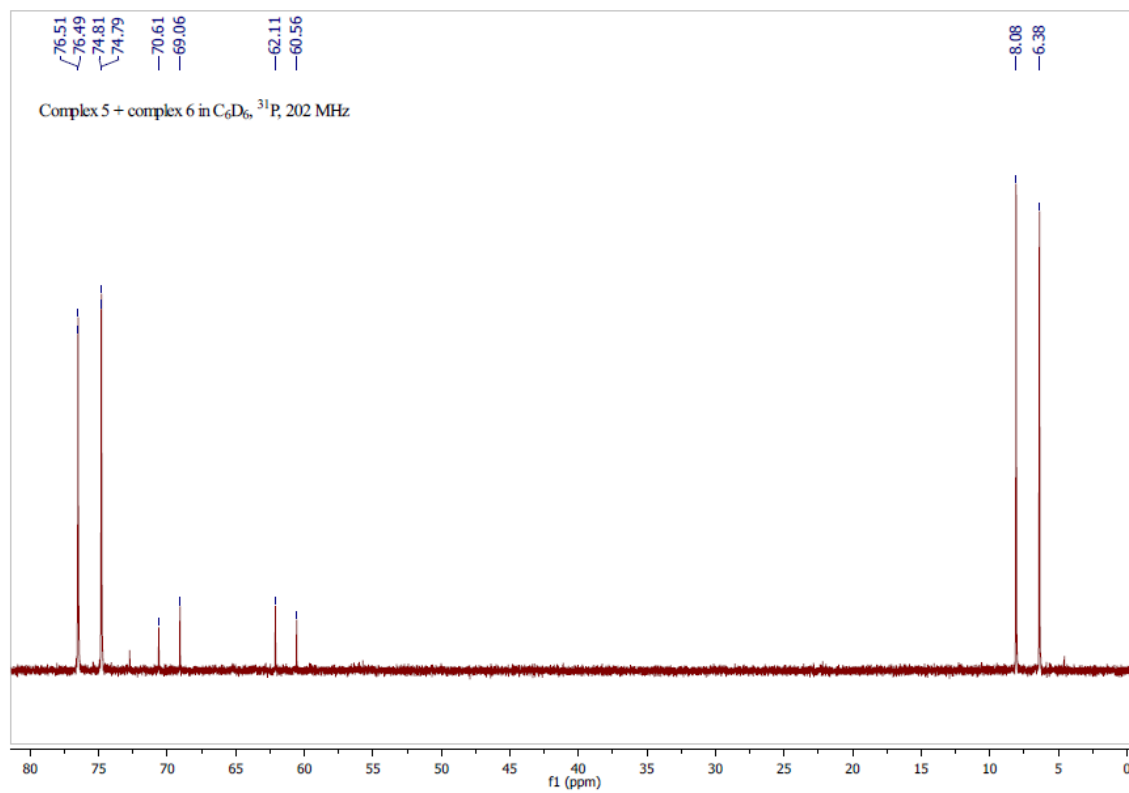

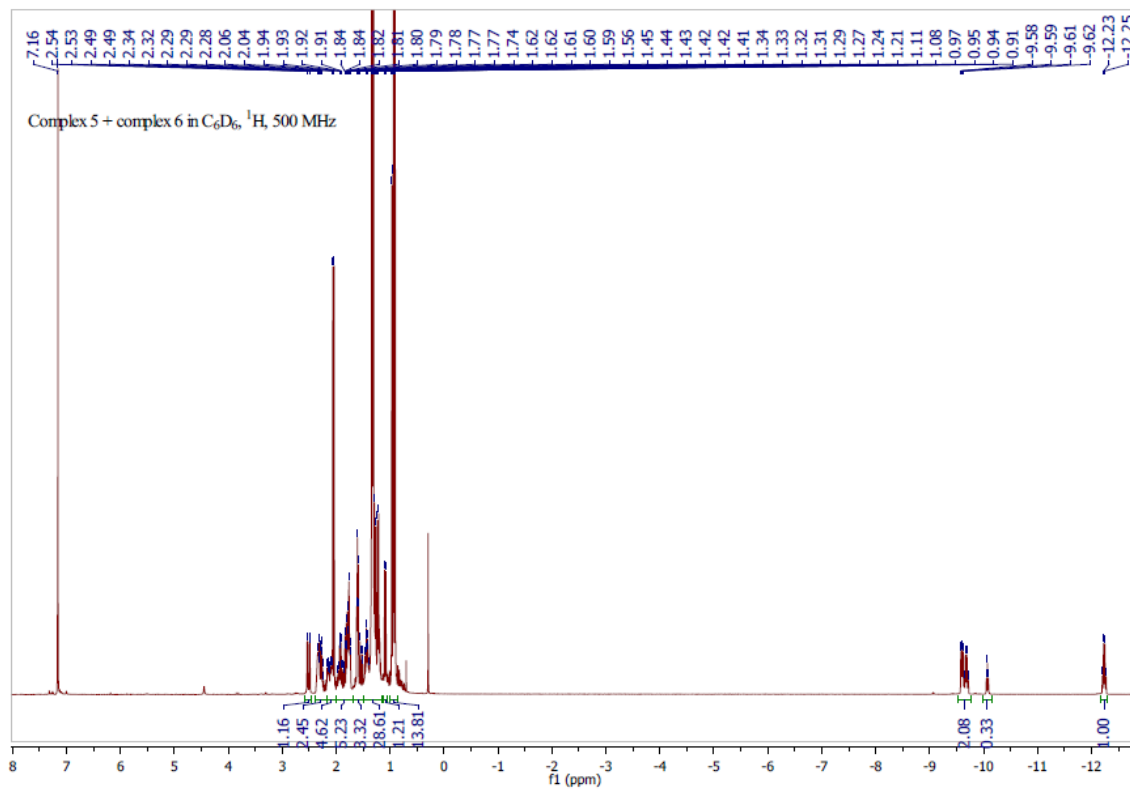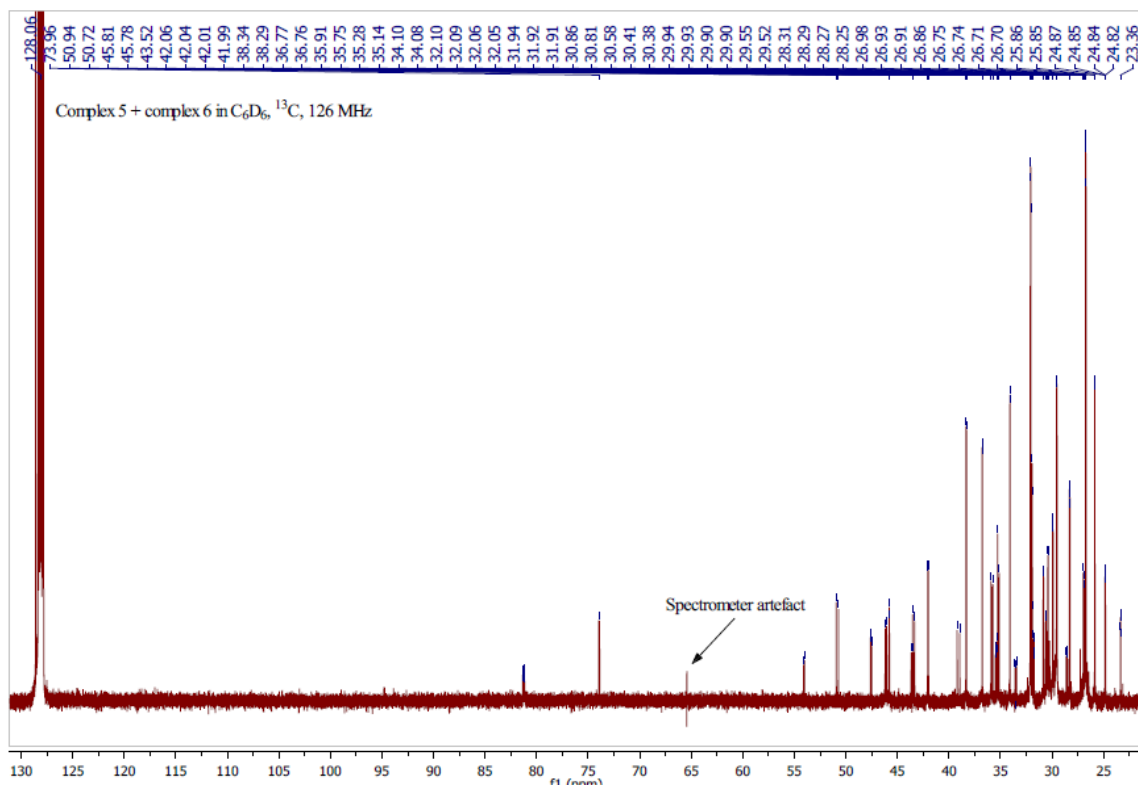

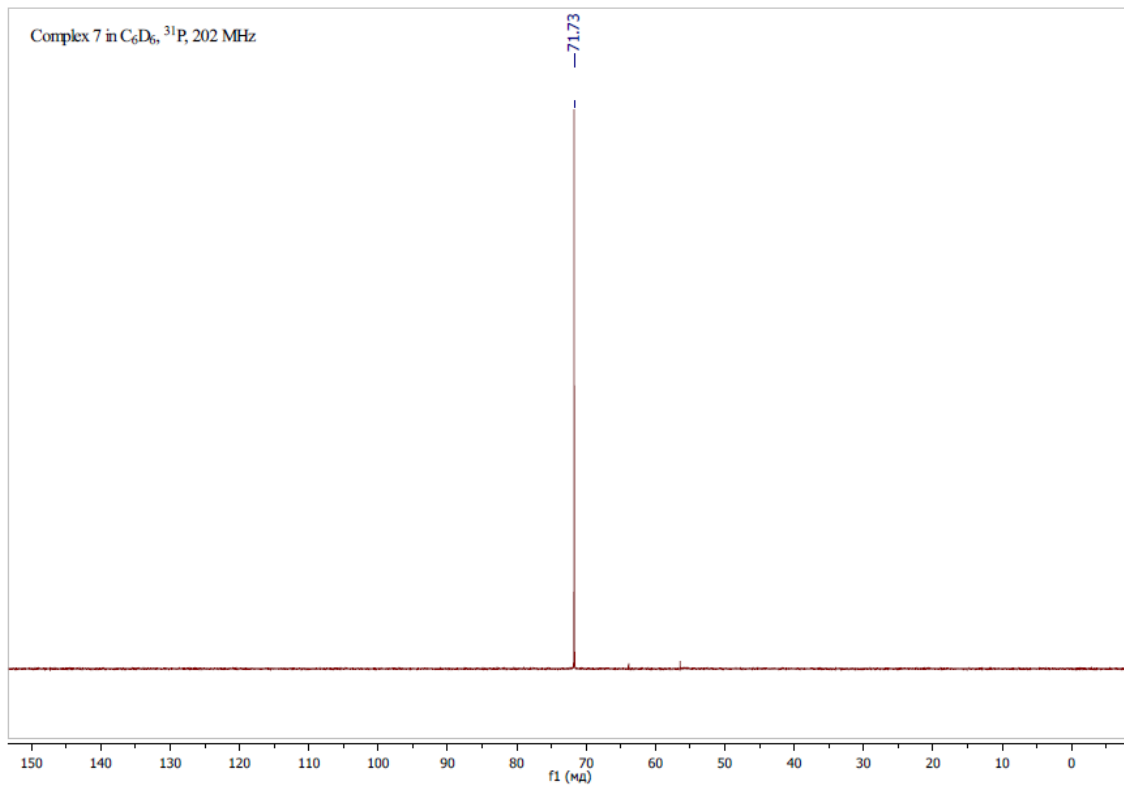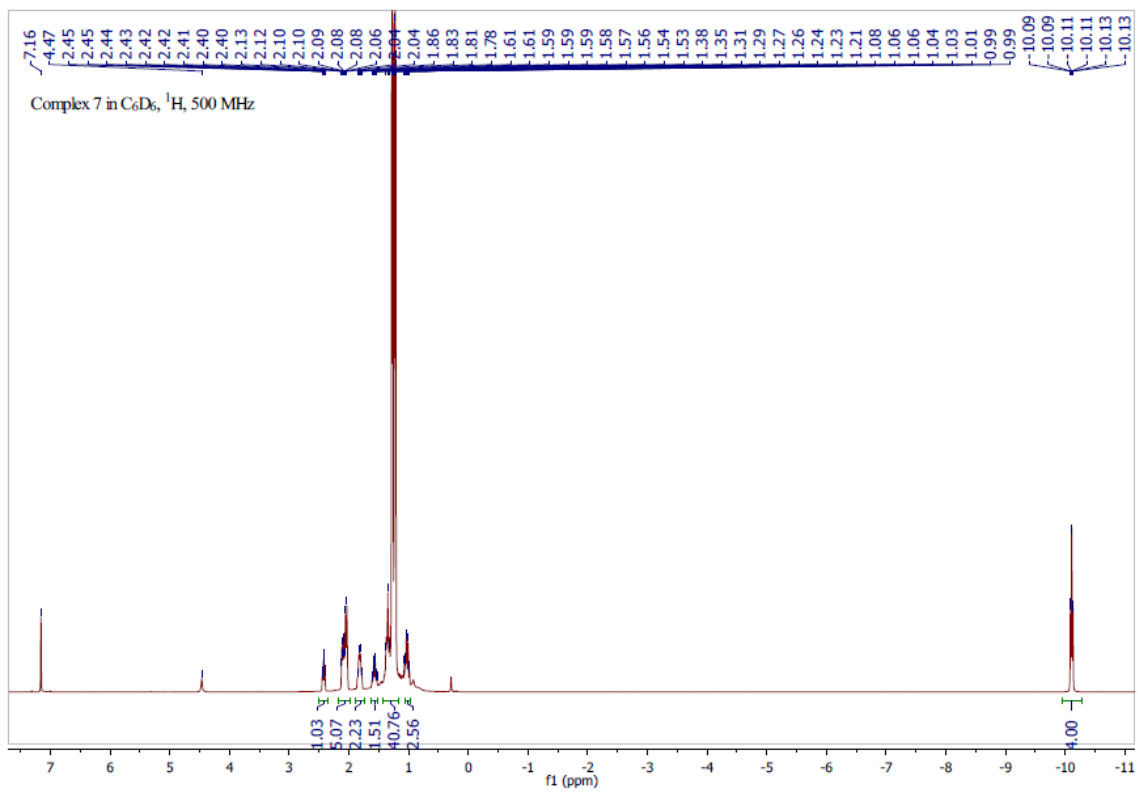

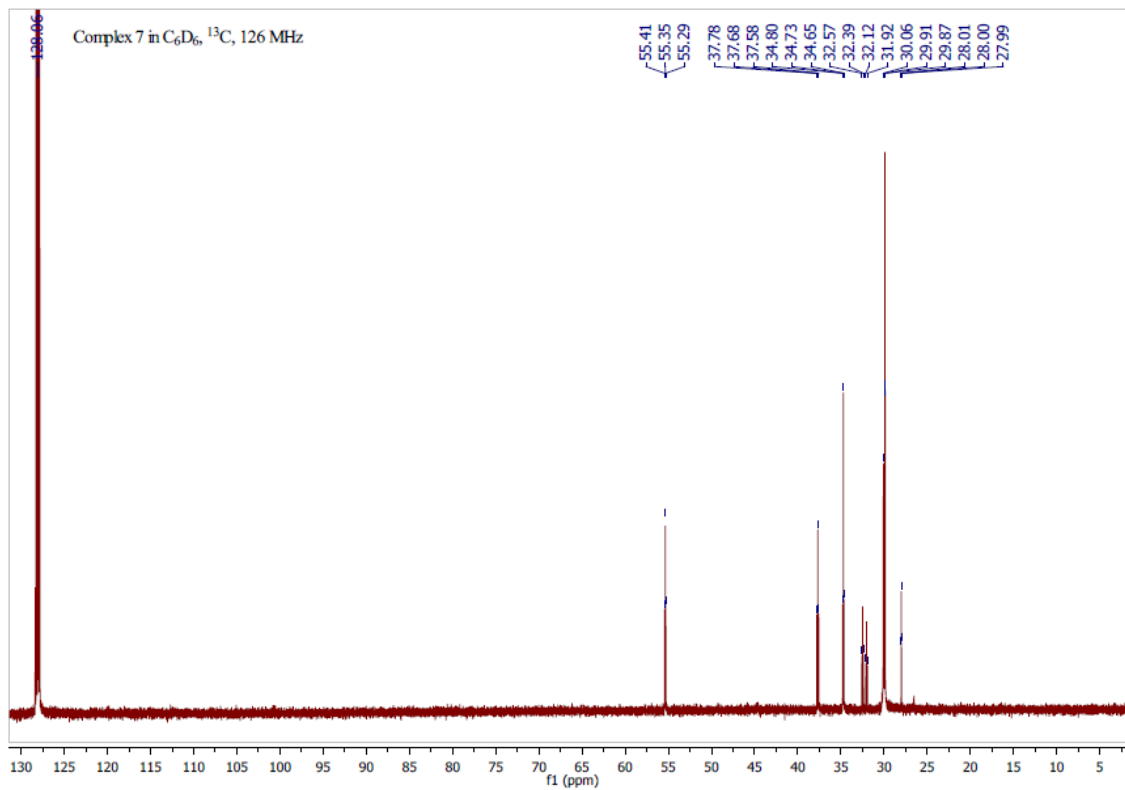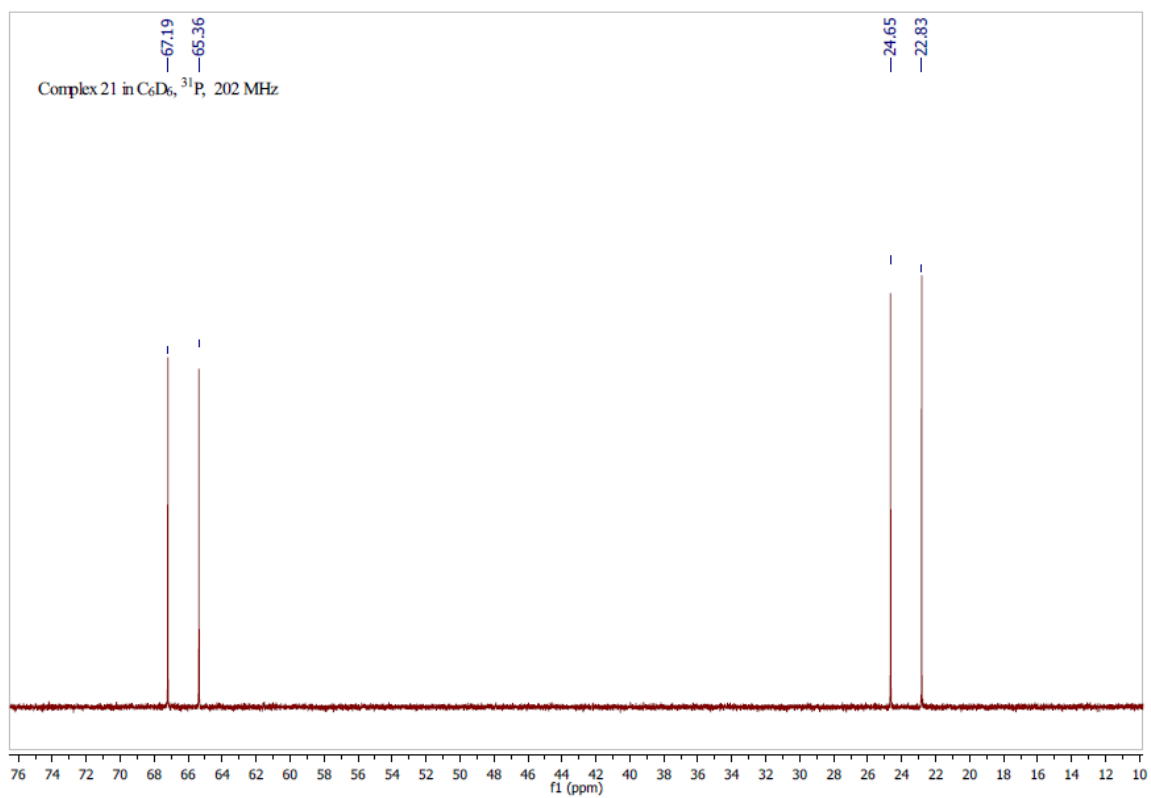

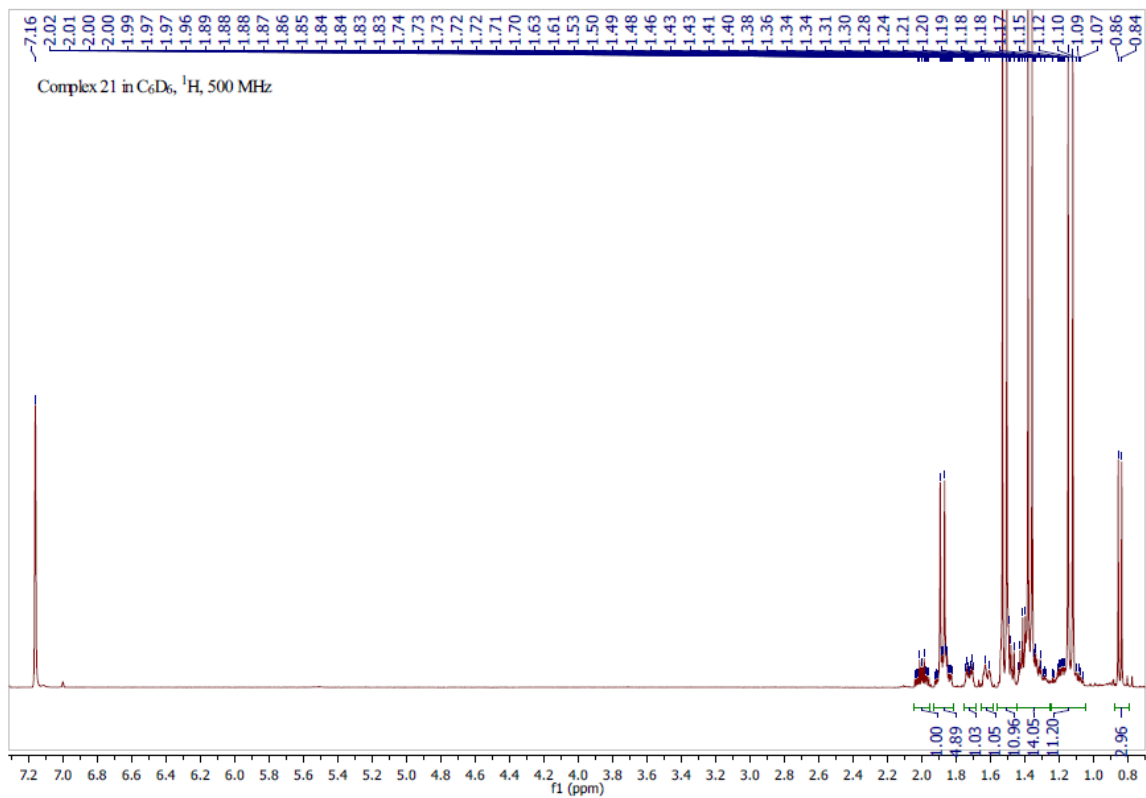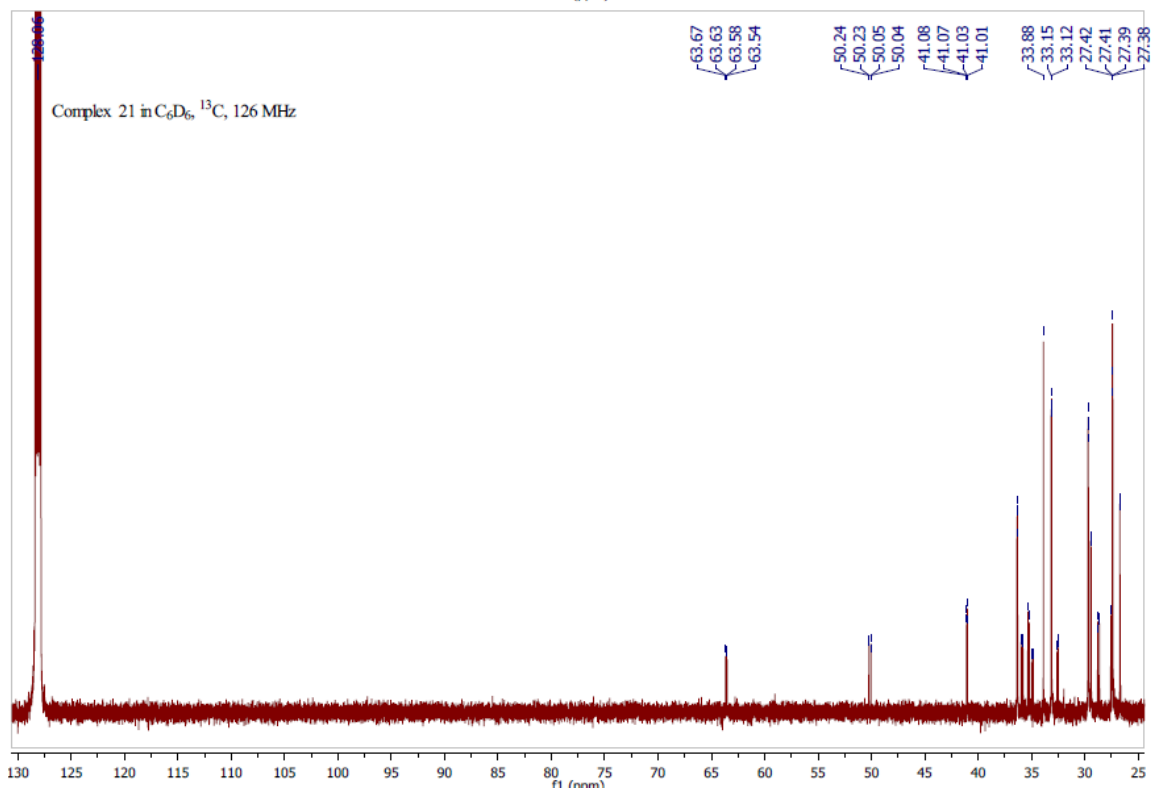

#### 4. References

1. C. J. Moulton, B. L. Shaw, *J. Chem. Soc., Dalton Trans.* 1976, 1020.
2. CrysAlis CCD, Oxford Diffraction Ltd. Abingdon, Oxfordshire, UK, 2005.
3. G. M. Sheldrick, SHELXTL, 5.1, Program for structure solution and least squares refinement, University of Göttingen, Göttingen, Germany, 1998.
4. Jaguar, version 7.6, Schrödinger, LLC, New York, NY, 2009; [www.schrodinger.com](http://www.schrodinger.com).
5. A. D. Becke, *J. Chem. Phys.* 1993, **98**, 5648.
6. C. Lee, W. Yang and R. G. Parr, *Phys. Rev. B.* 1988, **37**, 785.
7. Y. Zhao and D. G. Truhlar, *Theor. Chem. Acc.* 2008, **120**, 215.
8. Y. Zhao and D. G. Truhlar, *J. Chem. Phys.* 2006, **125**, 194101.
9. S. Grimme, J. Antony, S. Ehrlich, H. Krieg, *J. Chem. Phys.* 2010, **132**, 154104.
10. J. M. L. Martin and A. Sundermann, *J. Chem. Phys.* 2001, **114**, 3408.
11. B. Marten, *et al. J. Phys. Chem.* 1996, **100**, 11775.
12. B. B. Averkiev and D. G. Truhlar, *Catal. Sci. Technol.* 2011, **1**, 1526.
13. G. Frenking and N. Fröhlich, *Chem. Rev.* 2000, **100**, 717.
14. G. Frenking, M. Sola and S. F. Vyboishchikov, *J. Organomet. Chem.* **2005**, 690, 6178.
